# Supplementary material for: Randomised controlled trial for high-dose intravenous zinc as adjunctive therapy in SARS-CoV-2 (COVID-19) positive critically ill patients: trial protocol
Source: PubMed Central journal article supplement — BMJ Open. 2020 Dec 2;10(12):e040580. doi: 10.1136/bmjopen-2020-040580 (PMC7712927; doi:10.1136/bmjopen-2020-040580), 2020-12-02
Supplement: bmjopen-2020-040580.draft_revisions.pdf [file bmjopen-2020-040580.draft_revisions.pdf]

# BMJ Open

BMJ Open is committed to open peer review. As part of this commitment we make the peer review history of every article we publish publicly available.

When an article is published we post the peer reviewers' comments and the authors' responses online. We also post the versions of the paper that were used during peer review. These are the versions that the peer review comments apply to.

The versions of the paper that follow are the versions that were submitted during the peer review process. They are not the versions of record or the final published versions. They should not be cited or distributed as the published version of this manuscript.

BMJ Open is an open access journal and the full, final, typeset and author-corrected version of record of the manuscript is available on our site with no access controls, subscription charges or pay-per-view fees (<http://bmjopen.bmj.com>).

If you have any questions on BMJ Open's open peer review process please email [info.bmjopen@bmj.com](mailto:info.bmjopen@bmj.com)

# BMJ Open

## A randomised controlled trial for high-dose intravenous zinc as adjunctive therapy in SARS-CoV-2 (COVID-19) positive critically ill patients: trial protocol

|                               |                                                                                                                                                                                                                                                                                                                                                                                                                                                                                                                                                                                                                                                            |
|-------------------------------|------------------------------------------------------------------------------------------------------------------------------------------------------------------------------------------------------------------------------------------------------------------------------------------------------------------------------------------------------------------------------------------------------------------------------------------------------------------------------------------------------------------------------------------------------------------------------------------------------------------------------------------------------------|
| Journal:                      | <i>BMJ Open</i>                                                                                                                                                                                                                                                                                                                                                                                                                                                                                                                                                                                                                                            |
| Manuscript ID                 | bmjopen-2020-040580                                                                                                                                                                                                                                                                                                                                                                                                                                                                                                                                                                                                                                        |
| Article Type:                 | Protocol                                                                                                                                                                                                                                                                                                                                                                                                                                                                                                                                                                                                                                                   |
| Date Submitted by the Author: | 19-May-2020                                                                                                                                                                                                                                                                                                                                                                                                                                                                                                                                                                                                                                                |
| Complete List of Authors:     | Perera, Marlon; Austin Health, Department of Surgery<br>El Khoury, John; Austin Health, Department of Surgery<br>Chinni, Vidyasagar; Austin Health, Department of Surgery<br>Bolton, Damien ; Austin Health, Department of Surgery<br>Johnson, Paul; Austin Health, Infectious Diseases<br>Trubiano, Jason ; Austin Health, Infectious Diseases<br>McDonald, Christine; Austin Health, Respiratory and Sleep Medicine<br>Jones, Daryl; Austin Health, Intensive Care Unit Austin Hospital<br>Bellomo, Rinaldo; Austin Health, Intensive Care<br>Patel, Oneel; Austin Health, Department of Surgery<br>Ischia, Joseph; Austin Health, Department of Surgery |
| Keywords:                     | Respiratory infections < THORACIC MEDICINE, VIROLOGY, INFECTIOUS DISEASES, PUBLIC HEALTH, Public health < INFECTIOUS DISEASES                                                                                                                                                                                                                                                                                                                                                                                                                                                                                                                              |
|                               |                                                                                                                                                                                                                                                                                                                                                                                                                                                                                                                                                                                                                                                            |

SCHOLARONE™  
Manuscripts

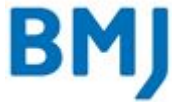

I, the Submitting Author has the right to grant and does grant on behalf of all authors of the Work (as defined in the below author licence), an exclusive licence and/or a non-exclusive licence for contributions from authors who are: i) UK Crown employees; ii) where BMJ has agreed a CC-BY licence shall apply, and/or iii) in accordance with the terms applicable for US Federal Government officers or employees acting as part of their official duties; on a worldwide, perpetual, irrevocable, royalty-free basis to BMJ Publishing Group Ltd ("BMJ") its licensees and where the relevant Journal is co-owned by BMJ to the co-owners of the Journal, to publish the Work in this journal and any other BMJ products and to exploit all rights, as set out in our [licence](#).

The Submitting Author accepts and understands that any supply made under these terms is made by BMJ to the Submitting Author unless you are acting as an employee on behalf of your employer or a postgraduate student of an affiliated institution which is paying any applicable article publishing charge ("APC") for Open Access articles. Where the Submitting Author wishes to make the Work available on an Open Access basis (and intends to pay the relevant APC), the terms of reuse of such Open Access shall be governed by a Creative Commons licence – details of these licences and which [Creative Commons](#) licence will apply to this Work are set out in our licence referred to above.

Other than as permitted in any relevant BMJ Author's Self Archiving Policies, I confirm this Work has not been accepted for publication elsewhere, is not being considered for publication elsewhere and does not duplicate material already published. I confirm all authors consent to publication of this Work and authorise the granting of this licence.

1  
2  
3 **A randomised controlled trial for high-dose intravenous zinc as adjunctive therapy in**  
4 **SARS-CoV-2 (COVID-19) positive critically ill patients: trial protocol**  
5  
6  
7

8 Marlon Perera<sup>1</sup>, John El-Khoury<sup>1</sup>, Vidyasagar Chinni<sup>1</sup>, Damien Bolton<sup>1</sup>, Paul Johnson<sup>2</sup>, Jason  
9 Trubiano<sup>2</sup>, Christine F. McDonald<sup>3,4</sup>, Daryl Jones<sup>4</sup>, Rinaldo Bellomo<sup>4</sup>, Oneel Patel<sup>1</sup>, Joseph  
10 Ischia<sup>1</sup>  
11  
12  
13  
14

- 15 1. Department of Surgery, University of Melbourne, Austin Health, Victoria, 3084
- 16 2. Department of Infectious disease, Austin Health, Victoria, 3084
- 17 3. Department of Respiratory and Sleep Medicine, Austin Health, Victoria, 3084
- 18 4. Department of Medicine, University of Melbourne, Victoria 3084
- 19 5. Department of Intensive Care, University of Melbourne, Austin Health, Victoria, 3084
- 20
- 21
- 22
- 23
- 24

25 Please Address Correspondence to:

26 Dr Marlon Perera

27 Department of Surgery, Austin Health, Victoria, Australia

28 E: marlonLperera@gmail.com  
29  
30  
31  
32

33 Keywords: randomized controlled trial, trial protocol, zinc, COVID, respiratory medicine  
34  
35  
36

37 Disclosure: Nil financial interests

38 This manuscript is original and has not been submitted to any alternate journals  
39  
40  
41  
42  
43  
44  
45  
46  
47  
48  
49  
50  
51  
52  
53  
54  
55  
56  
57  
58  
59  
60

## **Abstract**

### **Introduction**

SARS-CoV-2 (COVID 19) has caused an international pandemic of respiratory illness, resulting in significant healthcare and economic turmoil. To date, no robust vaccine or treatment has been identified. Elemental Zinc has previously been demonstrated to have beneficial effects on coronaviruses and other viral respiratory infections due to its' effect on RNA polymerase. Additionally, Zinc has well demonstrated protective effects against hypoxic injury – a clear mechanism of end-organ injury in respiratory distress syndrome. We aimed to assess the effect of high dose intravenous zinc (HDIVZn) on SARS-CoV-2 infection. The end of study analyses evaluated the reduction of impact of oxygen saturations or requirement of oxygen supplementation.

### **Methods and Analysis**

We designed a double-blind randomised controlled trial of daily HDIVZn (0.5mg/kg) versus placebo. Primary outcome measures are lowest oxygen saturations (or greatest supplemental oxygenation) for non-ventilated patients and worst PaO<sub>2</sub>/FiO<sub>2</sub> for ventilated patients. Following power calculations, 100 hospitalised patients and 160 ventilated patients will be recruited to demonstrate a 20% difference. The duration of the followup is up to the point of discharge.

### **Ethics and dissemination**

Ethical approval was sought through the independent Human Research Ethics Committee. Participant recruitment will commence in May 2020. Results will be published in peer-reviewed medical journals.

### **Trial Registration**

Clinical trial registered with Australian New Zealand Clinical Trials Registry (ACTRN126200000454976)

### **Strengths and Limitations of this study**

- COVID19 associated respiratory infection results in severe respiratory distress syndrome and potentially death
- High dose Zinc has previous demonstrated efficacy in patients with alternate corona virus and further demonstrates protection in end-organ hypoxia
- We aimed to determine the efficacy of high dose intra-venous zinc on respiratory and end-organ outcomes in patients infected with COVID19
- We designed a double-blind placebo-controlled randomised clinical trial with well-defined universal outcome measures
- High dose intravenous zinc has been proven safe in previous studies of critically ill patients.

## **Introduction**

Since December 2019, a new coronavirus, designated SARS-CoV-2, has caused an international pandemic of respiratory illness termed COVID-19, posing significant threats to global health and the economy<sup>1-3</sup>. In more severe cases, COVID-19 enters the lungs, causing respiratory complications such as bronchitis and pneumonia<sup>4,5</sup>. Development of pneumonia leads to a reduced ability for oxygenation and in some cases the development of acute respiratory distress syndrome (ARDS), requiring mechanical ventilation. In the most severe cases, patients can develop multiple organ failure and hypoxic brain injury. In the absence of an effective vaccine or robust treatment for people with the disease<sup>6</sup>, there is an urgent need to find a treatment that inhibits virus replication or reduces the progression of the disease.

Zinc is a naturally occurring essential heavy metal, and zinc deficiency is associated with a range of pathological conditions, including retarded growth and delayed wound healing and tissue repair. Zinc is also important for the maintenance and development of the immune system and plays a role in cell division and growth. Zinc deficiency results in reduced immunity and increases susceptibility to infectious diseases<sup>7,8</sup>. Numerous studies report the potential of zinc and zinc salts to inhibit viral infections in clinical and experimental settings. Viral infections that have been successfully inhibited by zinc include the common cold (a type of coronavirus)<sup>9</sup>, respiratory syncytial virus infections<sup>10</sup>, cytomegalovirus infections<sup>11</sup> and herpes labialis<sup>12</sup>. More importantly, zinc is a potent inhibitor of the replication of SARS-coronavirus (SARS-CoV) and equine arteritis virus (EAV) in cell culture<sup>13</sup>.

Furthermore, our published studies have shown that high dose intravenous zinc (HDIVZn) protects various organs, including the heart, kidneys and liver against the damage caused by hypoxia<sup>7,14-16</sup>. In addition to being efficacious, the dose of elemental zinc at the 0.25mg/kg (~0.5mg/kg ZnCl<sub>2</sub>) dose used for our HDIVZn and applied in our preclinical study in sheep is very safe and well-tolerated in humans as verified from multiple observational reports including the treatment of very sick children in an ICU setting with suspected zinc deficiency<sup>17-20</sup>.

We plan to perform a randomised controlled trial to test the efficacy and safety of HDIVZn administered as a daily injection in subjects with COVID-19 infection to assess whether giving HDIVZn to patients improves clinical outcomes.

## **Methods and Design**

1  
2  
3 Ethical approval was sought through the institutional Human Research Ethics  
4 Committee. This clinical trial was registered with Australian New Zealand Clinical Trials  
5 Registry (ACTRN126200000454976). The protocol design was produced in adherence with  
6 the Standard Protocol Items for Randomised Trials (SPIRIT) <sup>21</sup>.  
7  
8  
9

### 10 11 *Patient and public involvement*

12  
13 The development of the research question stemmed from the urgent global crisis  
14 inflicted by COVID-19, and the urgent need for a therapy to reduce the impact of the disease  
15 on the individual patients. Patients were not intrinsically involved in the design, recruitment  
16 or conduct of the study. Results of the study will be disseminated to patients after  
17 publication in peer-review journal. While the burden of the treatment or placebo was not  
18 assessed directly by patients, it was deemed minimal due to the lack of deviation from  
19 standard care.  
20  
21  
22  
23  
24  
25

### 26 27 *Study design*

28 Institutional ethical approval was sought through the Human Research Ethics  
29 Committee. This is a Phase 2, double-blind, placebo-controlled, randomised study at a single  
30 institution. The study plans to randomise 160 participants and is performed on hospitalised  
31 or critically-ill patients with confirmed COVID-19 (as detailed in Table 2). The study plans to  
32 evaluate the efficacy and safety of HDIVZn over a seven-day period of treatment.  
33  
34  
35  
36  
37

### 38 39 *Dosing rationale*

40 The upper limit for daily zinc intake in an adult is 40mg. However, when 30 mg of  
41 elemental zinc was given orally to humans, it resulted in an only 1.8-fold increase in plasma  
42 zinc in the first 4 hours <sup>22</sup>. A similar study in humans where elemental Zn was given orally at  
43 30 mg/d for six months showed a statistically significant but clinically marginal increase in  
44 the plasma zinc from  $14.18 \pm 1.75 \mu\text{mol/L}$  in the placebo group to  $17.18 \pm 3.48 \mu\text{mol/L}$  in zinc  
45 group <sup>23</sup>. Oral delivery of zinc is affected by several factors, including normal variations in  
46 gut zinc absorption, dietary factors such as the presence of phytate, and interactions with  
47 other metal ions <sup>24</sup>. Also, repeated high oral zinc intake causes a rapid and significant  
48 upregulation of intestinal metallothioneins which markedly decreases subsequent gut zinc,  
49 and importantly copper, absorption <sup>25</sup>. The latter may lead to copper deficiency in patients  
50 administered zinc for prolonged periods.  
51  
52  
53  
54  
55  
56  
57

58 In our recently published sheep study, we determined that a single IV dose of  $\text{ZnCl}_2$   
59  
60



1  
2  
3 at 0.5mg/kg increased the plasma zinc concentration by 4-fold from a baseline  
4 concentration of  $11.3 \pm 0.4 \mu\text{mol/L}$  to  $46.5 \pm 1.5 \mu\text{mol/L}$  within two hours<sup>14</sup>. Interestingly,  
5 two doses of IV  $\text{ZnCl}_2$  at 0.5mg/kg increased the plasma zinc concentration 7-fold from a  
6 baseline concentration of  $11.3 \pm 0.4 \mu\text{mol/L}$  to  $70.1 \pm 5.8 \mu\text{mol/L}$ .  
7  
8  
9

10 Translation of a drug's dose from animals to humans depends on the drug dose  
11 correction factor ( $K_m$ ) which is calculated by dividing the average body weight (kg) of a  
12 species by its body surface area ( $\text{m}^2$ ). For humans,  $K_m$  is 37<sup>26</sup>. Direct carryover of a drug's  
13 pharmacologic dosage, from animals to humans depends on how similar the  $K_m$  value of the  
14 animal species in which efficacy was tested, is to human  $K_m$ . As published in<sup>26</sup>,  $K_m$  for rats is  
15 6, and for rabbit,  $K_m$  is 12. Moreover, for sheep  $K_m$  is 36 (average body weight of sheep is  
16 40kg, and body surface area is  $1.10\text{m}^2$ <sup>27</sup>). Therefore, the near similar  $K_m$  value of sheep (36)  
17 to that of humans (37) has allowed us to conclude that human equivalent elemental zinc  
18 dosage would equate to 0.25mg/kg, the same dose that was shown to be protective in the  
19 sheep study and which we plan to use in our proposed trial.  
20  
21  
22  
23  
24  
25  
26

27 Information regarding the safety of HDIVZn can be derived from published reports  
28 where humans were treated with high doses of zinc<sup>17-20</sup>. The estimated elemental HDIVZn  
29 dosage for an average 70kg human to be used in our proposed study will be  $0.25\text{mg/d} \times$   
30  $70\text{kg}=17\text{mg/d}$ . Elemental zinc has been administered at a substantially higher dose (ranging  
31 from 26.4 to 37.5mg/d for eight successive days) in the treatment of human burns without  
32 any side effects<sup>17-19</sup>. In fact, zinc at doses ranging from 5-22mg/d has been administered in  
33 humans routinely as a component of parenteral nutrition without any reported side effects  
34<sup>28</sup>. Furthermore, a recently published phase I clinical trial in critically ill children with  
35 suspected zinc deficiency involved administration of zinc intravenously at a dose 3-times  
36 higher than is proposed in the current study ( $0.75\text{mg/kg/d}$  for seven days), without any  
37 adverse effects<sup>20</sup>.  
38  
39  
40  
41  
42  
43  
44  
45  
46

#### 47 *Study objective and endpoints*

48 The endpoints of this study are listed in Table 1. The primary objective is to assess  
49 the effect of 7 days of HDIVZn on oxygenation in comparison with placebo in patients with  
50 confirmed COVID19. Oxygenation (litres/minute) will be measured by either the highest  
51 level of supplemental oxygen (non-ventilated patients) or lowest  $\text{PaO}_2/\text{FiO}_2$  ratio in  
52 ventilated patients.  
53  
54  
55  
56

57 Secondary outcome measures include ICU and in-hospital mortality, length of stay in  
58 ICU or hospital, duration of oxygenation, severe adverse drug events and changes based on  
59  
60

WHO R&D Blueprint “Novel Coronavirus COVID-19 Therapeutic Trial synopsis”. The following is based on an eight-point ordinal scale consisting of:

- 0, not hospitalized, no clinical or virological evidence of infection;
- 1, not hospitalized, Infected, and able to resume normal activities;
- 2, not hospitalized, Infected, but unable to resume normal activities;
- 3, hospitalized, no requirement of supplemental oxygen;
- 4, hospitalized, requiring oxygen therapy via mask or nasal prongs;
- 5, hospitalized, non-invasive ventilation, requiring high flow oxygen;
- 6, hospitalized, intubation and mechanical ventilation
- 7, hospitalized, requiring ECMO, invasive mechanical ventilation, additional organ support, RRT;
- 8, death;

#### *Sample size*

The primary outcome of this study is related to the effect of zinc therapy on the level of oxygenation expressed either as worst (highest) oxygen flow (in litres/min) in non-ventilated patients or worst (lowest) PaO<sub>2</sub> (in mmHg)/FiO<sub>2</sub> (as a fraction of 1) ratio in ventilated patients. We hypothesize that zinc therapy will decrease the worst level of oxygenation during the first week (of the treatment period) by 20% compared to placebo from a mean worst value of 10L/min (placebo) to a mean of 8L/min (zinc) or for PaO<sub>2</sub>/FiO<sub>2</sub> ratio from a mean worst value of 150 (placebo) to a mean worst value of 180 (zinc). If patients transition from non-ventilated to ventilated during the study period, the PaO<sub>2</sub>/FiO<sub>2</sub> ratio will be used.

To have an 80% power to see such an effect at an alpha of 0.05 in non-ventilated patients, assuming a standard deviation (SD) for O<sub>2</sub> flow of 4L/min 28 patients would have to be randomized in each arm. In ventilated patients, to have an 80% power to see such an effect at an alpha of 0.05, assuming an SD for the PaO<sub>2</sub>/FiO<sub>2</sub> ratio of 60, 49 patients would have to be randomized in each arm.

Rounding off the first group to 30 per arm and the second group to 50 per arm to account for withdrawals, we estimate that a study of 160 patients would provide a suitable sample size to test our primary hypothesis.

#### **Study procedures**

##### *Eligibility*

1  
2  
3           Consenting COVID-19 symptomatic confirmed hospitalized adult patients who fulfil  
4 World Health Organisation's case definition which includes a positive polymerase chain  
5 reaction (PCR) for COVID-19 from any specimen (e.g. respiratory, blood, urine, stool, other  
6 bodily fluid). Inclusion and exclusion criteria are summarised in Table 2.  
7  
8  
9

### 10 11 *Randomization*

12  
13           This pilot study will be conducted as a randomised double-blinded placebo-  
14 controlled study using a stratified randomization method. Ward and ICU patients will be  
15 enrolled as soon as possible after fulfilling the criteria of stratification. Patients will be  
16 stratified based on whether they required mechanical ventilation. Thereafter, a permuted  
17 block randomisation method with variable block sizes of 2, 4 and 6 will be used to allocate  
18 eligible patients to either the treatment group, receiving HDIVZn or to the control group in a  
19 1:1 ratio. Randomisation will be performed by the randomisation module in Research  
20 Electronic Data Capture (REDCap, Vanderbilt University, USA), which is a secure web  
21 application for managing online data collection. Assessment of the unblinding procedures by  
22 the project research officer in the case of adverse event will be performed if necessary. The  
23 clinical staff involved in patient care will administer the trial drugs as soon as possible after  
24 enrolment.  
25  
26  
27  
28  
29  
30  
31  
32  
33  
34

### 35 *Study drug administration and blinding*

36  
37           Pharmaceutical grade zinc chloride stock solution obtained from an Australian  
38 company (Phebra Pty Ltd, Lane Cove West, NSW, Australia) will be diluted in 250ml of  
39 normal saline and infused, resulting in a final dosage of 0.5mg/kg/d. Patients will be  
40 administered zinc daily for seven days. To standardise administration time, zinc infusions will  
41 commence early morning. Zinc will be administered via central venous or peripheral access  
42 over 3-6 hrs. The clinical trial nurse (allocation concealment) will use a web-based  
43 randomisation program to determine the allocation of patients and then prepare the coded  
44 zinc solution or placebo. Each coded solution bag, which will be indistinguishable  
45 irrespective of study group, will then be dispensed for administration to the patient as per  
46 protocol. This coded identifying study number will also be labelled on the patient case  
47 report form (CRF). The investigators, study coordinators, treating physicians, bedside nurses  
48 and patients/family will remain blinded to the allocated study solution.  
49  
50  
51  
52  
53  
54  
55  
56  
57

### 58 **Study assessment**

### *Screening procedures*

The screening log is designed to monitor patient recruitment at the participating site. A screening log will be maintained at each participating site by the research coordinator to document patients evaluated for enrolment. The log will provide a record of all patients assessed for eligibility and deemed ineligible for the study. When a patient is considered ineligible, the reason(s) will be noted on the log. The log will also be used to assess patient recruitment targets.

### *Physical examination, measurements and laboratory tests*

All data will be collected by trained staff at each study site using a case report form (CRF) worksheet developed by the coordinating centre. Data will then be entered into the REDCap web database (electronic CRF [eCRF]). Randomised patients will be followed up to discharge, death or 28 days post-randomisation whichever occurs first.

Study day 1 commences on randomisation and concludes at the expiry of the calendar day. Data collection will be restricted primarily to those variables necessary to define clinical patient characteristics including baseline demographics, primary diagnoses, physiological parameters, diagnostic interventions, therapeutic interventions and documentation of deaths and other serious adverse events. A complete list of collected data is summarised in Table 3.

### *Adverse events*

An adverse reaction is defined as any untoward and unintended response to an investigational medicinal product related to any dose administered. All adverse events judged by either the reporting investigator or the sponsor as having a reasonable possibility of a causal relationship to an investigational medicinal product will qualify as adverse reactions. All adverse events which are considered to be potentially causally related to the study intervention or are otherwise of concern in the investigator's judgement will be reported. An interim analysis is planned after 50% (80) of the patients have been randomised.

### *Criteria for withdrawal*

The study treatment will be discontinued in cases where the participant wishes to withdraw from the trial or when a Grade 4 severity adverse event occurs.

## **Outcome measures**

### *Safety evaluations*

An independent Data Monitoring Committee (DMC), consisting of experts in intensive care, clinical research and biostatistics will be established before patient enrolment and will review all trial protocols. The role of the DMC will be to provide study oversight to ensure that the rights and safety of patients involved in the study are protected by reviewing reported Adverse Events and making recommendations to the Management Committee (MC).

### *Statistical evaluation*

The descriptive analysis of the data will include the calculation of means, standard deviations, and absolute and relative frequencies of the baseline and follow-up data. Randomisation will be checked by suitable two-sided statistical tests (Chi-Square, or Fisher's exact test for categorical data, Student's t-Test or Mann-Whitney-U tests for continuous data). If normality of the data is not given, non-parametric methods will be used. Potentially confounding factors will be checked for using multivariable logistic regression analysis. All data will be analysed according to the intention-to-treat principle. Continuous data will be tested for normal distribution using histograms. Between-group comparisons for continuous data will be performed with the use of the Student's t-test or the Mann-Whitney U test and for categorical data with the use of Fisher's exact test or chi-square test where appropriate. A p-value 0.05 will indicate statistical significance. A full model with clinical relevant covariates (e.g. sex, age, previous heart surgery, preoperative creatinine) will be used for a stepwise backward variable selection procedure to identify independent risk factors for AKI. Secondary endpoints will be analysed in the ITT collective using Fisher's exact test, or chi-square tests for categorical data, Student's t-tests and Mann-Whitney-U tests for continuous data.

A senior statistician will perform data analysis on an intention-to-treat basis. An interim analysis on the safety and the primary outcomes will be performed when 50% (80/160) of the patients have received zinc for at least seven days. Summary statistics will be used to describe the clinical data and presented as mean  $\pm$  SD, median with interquartile range (IQR) or percentages as appropriate. Chi-squared analysis with Fisher's exact test (when appropriate) and Student's t-test (Mann Whitney U test for non-normal distributions) will be used to compare data between the active treatment group and the control group

1  
2  
3 with statistical significance declared for probability values of 0.05 or less. Analysis of the  
4 outcome of excluded patients due to other trials etc. will be in accordance with the  
5 CONSORT guidelines.  
6  
7  
8  
9

## 10 **Discussion**

11 This single centre, double-blind, randomised controlled trial will assess the role of  
12 HDIVZn in protection against the SARS-CoV-2 virus. The beneficial effects of Zinc on viral  
13 infections have been previously demonstrated. Further, HDIVZn may provide additional  
14 protection to other end organs that may be indirectly affected by pulmonary injury and  
15 impaired oxygenation.  
16  
17  
18  
19

20 In coronaviruses,  $Zn^{2+}$  inhibits both the proteolytic processing of replicase  
21 polyproteins and the RNA-dependent RNA polymerase (RdRp) activity. Although  
22 mechanisms of action of zinc are unknown, several possibilities exist. Firstly, DNA and RNA  
23 polymerases use divalent metal ions like  $Mg^{2+}$  as a co-factor, and one possible mechanism is  
24 that  $Zn^{2+}$  displaces  $Mg^{2+}$  and subsequently inhibits RdRp activity. In support is the  
25 observation that various divalent metals ions sustained the activity of poliovirus RdRp in the  
26 following preference  $Mn^{2+} > Co^{2+} > Ni^{2+} > Fe^{2+} > Mg^{2+} > Ca^{2+} > Cu^{2+}$  <sup>29</sup>. In contrast,  $Zn^{2+}$  was  
27 incapable of sustaining RdRp catalyzed nucleotide incorporation <sup>29</sup>. Secondly, a zinc-binding  
28 pocket has been identified in the Dengue virus and SARS-coronavirus RdRp. Therefore, it is  
29 possible that binding of zinc may induce a structural change in the conformation of RdRp  
30 which disables RdRp to catalyze nucleotide incorporation. Finally, adding high  
31 concentrations of zinc ions to cells impairs viral polyprotein processing which is integral to  
32 virus replication <sup>30</sup>.  
33  
34  
35  
36  
37  
38  
39  
40  
41

42 In addition to the direct effect on viral replication and activity, HDIVZn may play a  
43 protective role in alternate organs. Zinc has been demonstrated to be beneficial in patients  
44 with severe pneumonia due to its anti-inflammatory properties <sup>31 32</sup>. Further, in SARS-CoV-2,  
45 respiratory compromise results in impaired oxygenation and hypoxia to various end organs.  
46 Such hypoxia may contribute to end-organ failure and increase the risk of mortality.  
47 Specifically, such Covid-19 associated hypoxia has been proposed to be contributory to  
48 cardiac injury <sup>33</sup>, hepatic injury <sup>34</sup> and renal injury <sup>35 36</sup>. Our published studies have shown  
49 that high dose intravenous zinc (HDIVZn) protects various organs, including the heart,  
50 kidneys and liver against the damage caused by hypoxia. It should be noted that hypoxia  
51 and oxidative stress, result in an increase in reactive oxygen species (ROS), including  
52 superoxide ( $O_2^-$ ), hydrogen peroxide ( $H_2O_2$ ) and hydroxyl radical ( $\cdot OH$ ) – which results in  
53  
54  
55  
56  
57  
58  
59  
60

1  
2  
3 intracellular damage<sup>37 38</sup>. Zinc appears to limit ROS production by several mechanisms.  
4 Firstly, metallothioneins (MTs), small cysteine-rich and heavy metal-binding proteins,  
5 participate in the intracellular defence against reactive oxygen and nitrogen species<sup>39</sup> and  
6 zinc has been shown to induce MT mRNA and protein expression. Secondly, zinc competes  
7 with Fe<sup>2+</sup> and Cu<sup>2+</sup> ions for binding to cell membranes and proteins – normally, these active  
8 metals catalyze the production of hydroxyl radical from H<sub>2</sub>O<sub>2</sub> via Fenton chemistry. Thirdly,  
9 zinc upregulates the production and activation of antioxidant proteins, molecules and  
10 enzymes such as glutathione, catalase and superoxide dismutase (SOD), which catalyze O<sub>2</sub><sup>-</sup>  
11 to oxygen or H<sub>2</sub>O<sub>2</sub><sup>40</sup>. Finally, zinc reduces the activation of oxidant-promoting enzymes such  
12 as inducible nitric acid synthase and NADPH enzyme, which catalyze oxygen to O<sub>2</sub><sup>-</sup>.  
13 Accordingly, we hypothesize that Zinc may provide protection against the hypoxic injury that  
14 critically ill patients with Covid-19 may experience.  
15

16  
17  
18  
19  
20  
21  
22  
23 The specific strengths of the current protocol design are a) prolonged exposure of  
24 HDIVZn and b) assessment of critically ill patients, a population where a benefit would be  
25 observed if truly present. There is an inherent difficulty in assessing pulmonary response in  
26 clinical trials, and accordingly, the primary outcome measure is a possible criticism.  
27 However, maximal oxygen requirements and PaO<sub>2</sub>/FiO<sub>2</sub> are well established surrogate  
28 markers<sup>41-43</sup>.  
29

30  
31  
32  
33 The safety of HDIVZn has been addressed in previous literature<sup>17-20</sup>. Elemental zinc  
34 has been administered at a substantially higher dose (ranging from 26.4 to 37.5mg/d for  
35 eight successive days) in the treatment of burns and did not produce any side effects in  
36 humans<sup>17-19</sup>. In the setting of critically ill patients, zinc intravenously at 3-times higher dose  
37 than the current study (0.75mg/kg/d for seven days), and it did not produce any adverse  
38 effects<sup>20</sup>.  
39

40  
41  
42  
43 In conclusion, we designed a single-centre, double-blind, randomised controlled trial  
44 to assess the potential benefit of HDIVZn for hospitalised or critically ill patients with SARS-  
45 CoV-2 infection and associated respiratory compromise. We believe that our well-designed  
46 trial will be able to expediently identify a potential agent that may improve outcomes for  
47 these critically ill patients.  
48  
49  
50  
51  
52  
53  
54  
55  
56  
57  
58  
59  
60



Contributors: MP assisted in protocol design, ethical submission and manuscript production. JEK and VC were involved in data collection and manuscript production. PJ, JT, CM were involved in patient care and study protocol design. DJ, DB, RB, OP and JI were involved in project design, patient care, manuscript production and supervision.

Competing interests: Nil

Funding: Funded by Austin Hospital Research Grant

## References

1. Hu Y, Sun J, Dai Z, et al. Prevalence and severity of corona virus disease 2019 (COVID-19): A systematic review and meta-analysis. *J Clin Virol* 2020;127:104371. doi: 10.1016/j.jcv.2020.104371 [published Online First: 2020/04/22]
2. Tu H, Tu S, Gao S, et al. The epidemiological and clinical features of COVID-19 and lessons from this global infectious public health event. *J Infect* 2020 doi: 10.1016/j.jinf.2020.04.011 [published Online First: 2020/04/22]
3. Weston S, Frieman MB. COVID-19: Knowns, Unknowns, and Questions. *mSphere* 2020;5(2) doi: 10.1128/mSphere.00203-20 [published Online First: 2020/03/20]
4. Zhu J, Zhong Z, Li H, et al. CT imaging features of 4,121 patients with COVID-19: a meta-analysis. *J Med Virol* 2020 doi: 10.1002/jmv.25910 [published Online First: 2020/04/22]
5. Ledford H. How does COVID-19 kill? Uncertainty is hampering doctors' ability to choose treatments. *Nature* 2020;580(7803):311-12. doi: 10.1038/d41586-020-01056-7 [published Online First: 2020/04/11]
6. Wang Y, Zhang D, Du G, et al. Remdesivir in adults with severe COVID-19: a randomised, double-blind, placebo-controlled, multicentre trial. *The Lancet* 2020 doi: 10.1016/S0140-6736(20)31022-9
7. Ischia J, Bolton DM, Patel O. Why is it worth testing the ability of zinc to protect against ischaemia reperfusion injury for human application. *Metallomics* 2019;11(8):1330-43. doi: 10.1039/c9mt00079h
8. Prasad AS. Zinc is an Antioxidant and Anti-Inflammatory Agent: Its Role in Human Health. *Frontiers in nutrition* 2014;1:14.
9. Hulisz D. Efficacy of zinc against common cold viruses: an overview. *J Am Pharm Assoc* 2004;44(5):594-603. doi: 10.1331/1544-3191.44.5.594.hulisz [published Online First: 2004/10/22]
10. Suara RO, Crowe JE, Jr. Effect of zinc salts on respiratory syncytial virus replication. *Antimicrob Agents Chemother* 2004;48(3):783-90. doi: 10.1128/aac.48.3.783-790.2004 [published Online First: 2004/02/26]
11. Li D, Wen LZ, H Yu. [Observation on clinical efficacy of combined therapy of zinc supplement and jinye baidu granule in treating human cytomegalovirus infection]. *Zhongguo Zhong Xi Yi Jie He Za Zhi* 2005;25(5):449-51. [published Online First: 2005/06/17]
12. Femiano F, Gombos F, Scully C. Recurrent herpes labialis: a pilot study of the efficacy of zinc therapy. *J Oral Pathol Med* 2005;34(7):423-5. doi:



- 1  
2  
3 10.1111/j.1600-0714.2005.00327.x [published Online First:  
4 2005/07/14]  
5  
6 13. te Velthuis AJ, van den Worm SH, Sims AC, et al. Zn(2+) inhibits coronavirus  
7 and arterivirus RNA polymerase activity in vitro and zinc ionophores  
8 block the replication of these viruses in cell culture. *PLoS Pathog*  
9 2010;6(11):e1001176. doi: 10.1371/journal.ppat.1001176 [published  
10 Online First: 2010/11/17]  
11  
12 14. O'Kane D, Gibson L, May CN, et al. Zinc preconditioning protects against renal  
13 ischaemia reperfusion injury in a preclinical sheep large animal model.  
14 *Biometals* 2018;31(5):821-34. doi: 10.1007/s10534-018-0125-3  
15  
16 15. Rao K, Sethi K, Ischia J, et al. Protective effect of zinc preconditioning against  
17 renal ischemia reperfusion injury is dose dependent. *PLoS ONE*  
18 2017;12(7):e0180028. doi: 10.1371/journal.pone.0180028  
19  
20 16. Cheung E, Nikfarjam M, Jackett L, et al. The Protective Effect of Zinc Against  
21 Liver Ischaemia Reperfusion Injury in a Rat Model of Global Ischaemia.  
22 *Journal of Clinical and Experimental Hepatology* 2019;August 20, 2019, In  
23 press. doi: 10.1016/j.jceh.2019.07.006  
24  
25 17. Berger MM, Baines M, Raffoul W, et al. Trace element supplementation after  
26 major burns modulates antioxidant status and clinical course by way of  
27 increased tissue trace element concentrations. *Am J Clin Nutr*  
28 2007;85(5):1293-300. doi: 10.1093/ajcn/85.5.1293  
29  
30 18. Berger MM, Binnert C, Chioloro RL, et al. Trace element supplementation  
31 after major burns increases burned skin trace element concentrations  
32 and modulates local protein metabolism but not whole-body substrate  
33 metabolism. *Am J Clin Nutr* 2007;85(5):1301-6. doi:  
34 10.1093/ajcn/85.5.1301  
35  
36 19. Berger MM, Spertini F, Shenkin A, et al. Trace element supplementation  
37 modulates pulmonary infection rates after major burns: a double-blind,  
38 placebo-controlled trial. *Am J Clin Nutr* 1998;68(2):365-71. doi:  
39 10.1093/ajcn/68.2.365  
40  
41 20. Cvijanovich NZ, King JC, Flori HR, et al. Safety and Dose Escalation Study of  
42 Intravenous Zinc Supplementation in Pediatric Critical Illness. *JPEN J*  
43 *Parenter Enteral Nutr* 2016;40(6):860-8. doi:  
44 10.1177/0148607115572193  
45  
46 21. Chan AW, Tetzlaff JM, Altman DG, et al. SPIRIT 2013 statement: defining  
47 standard protocol items for clinical trials. *Ann Intern Med*  
48 2013;158(3):200-7. doi: 10.7326/0003-4819-158-3-201302050-00583  
49 [published Online First: 2013/01/09]  
50  
51 22. Solomons NW, Romero-Abal ME, Weiss G, et al. Bioavailability of zinc from  
52 NutriSet zinc tablets compared with aqueous zinc sulfate. *Eur J Clin Nutr*  
53 2011;65(1):125-31. doi: 10.1038/ejcn.2010.198  
54  
55 23. Feillet-Coudray C, Meunier N, Rambeau M, et al. Long-term moderate zinc  
56 supplementation increases exchangeable zinc pool masses in late-middle-  
57 aged men: the Zenith Study. *Am J Clin Nutr* 2005;82(1):103-10. doi:  
58 10.1093/ajcn.82.1.103  
59  
60 24. Keyzer JJ, Oosting E, Wolthers BG, et al. Zinc absorption after oral  
administration of zinc sulfate. *Pharm Weekbl Sci* 1983;5(5):252-3.

- 1
- 2
- 3
- 4 25. Hempe JM, Carlson JM, Cousins RJ. Intestinal metallothionein gene expression
- 5 and zinc absorption in rats are zinc-responsive but refractory to
- 6 dexamethasone and interleukin 1 alpha. *J Nutr* 1991;121(9):1389-96.
- 7
- 8 26. Nair AB, Jacob S. A simple practice guide for dose conversion between
- 9 animals and human. *J Basic Clin Pharm* 2016;7(2):27-31. doi:
- 10 10.4103/0976-0105.177703
- 11
- 12 27. Bennett JW. Regional Body Surface-Area of Sheep. *J Agric Sci*
- 13 1973;81(Dec):429-32. doi: Doi 10.1017/S0021859600086469
- 14
- 15 28. Stehle P, Stoffel-Wagner B, Kuhn KS. Parenteral trace element provision:
- 16 recent clinical research and practical conclusions. *Eur J Clin Nutr*
- 17 2016;70(8):886-93. doi: 10.1038/ejcn.2016.53
- 18
- 19 29. Arnold JJ, Ghosh SK, Cameron CE. Poliovirus RNA-dependent RNA
- 20 polymerase (3D(pol)). Divalent cation modulation of primer, template,
- 21 and nucleotide selection. *J Biol Chem* 1999;274(52):37060-9. doi:
- 22 10.1074/jbc.274.52.37060 [published Online First: 1999/12/22]
- 23
- 24 30. Butterworth BE, Korant BD. Characterization of the large picornaviral
- 25 polypeptides produced in the presence of zinc ion. *J Virol* 1974;14(2):282-
- 26 91. [published Online First: 1974/08/01]
- 27
- 28 31. Srinivasan MG, Ndeezi G, Mboijana CK, et al. Zinc adjunct therapy reduces
- 29 case fatality in severe childhood pneumonia: a randomized double blind
- 30 placebo-controlled trial. *BMC Med* 2012;10:14. doi: 10.1186/1741-7015-
- 31 10-14 [published Online First: 2012/02/10]
- 32
- 33 32. Brooks WA, Yunus M, Santosham M, et al. Zinc for severe pneumonia in very
- 34 young children: double-blind placebo-controlled trial. *Lancet*
- 35 2004;363(9422):1683-8. doi: 10.1016/S0140-6736(04)16252-1
- 36 [published Online First: 2004/05/26]
- 37
- 38 33. Zhu H, Rhee JW, Cheng P, et al. Cardiovascular Complications in Patients with
- 39 COVID-19: Consequences of Viral Toxicities and Host Immune Response.
- 40 *Curr Cardiol Rep* 2020;22(5):32. doi: 10.1007/s11886-020-01292-3
- 41 [published Online First: 2020/04/23]
- 42
- 43 34. Feng G, Zheng KI, Yan QQ, et al. COVID-19 and Liver Dysfunction: Current
- 44 Insights and Emergent Therapeutic Strategies. *J Clin Transl Hepatol*
- 45 2020;8(1):18-24. doi: 10.14218/jcth.2020.00018 [published Online First:
- 46 2020/04/11]
- 47
- 48 35. Fanelli V, Fiorentino M, Cantaluppi V, et al. Acute kidney injury in SARS-CoV-2
- 49 infected patients. *Crit Care* 2020;24(1):155. doi: 10.1186/s13054-020-
- 50 02872-z [published Online First: 2020/04/18]
- 51
- 52 36. Mubarak M, Nasri H. COVID-19 nephropathy; an emerging condition caused
- 53 by novel coronavirus infection. *J Nephrothol* 2020;9(3):e21-e21. doi:
- 54 10.34172/jnp.2020.21
- 55
- 56 37. Castro L, Freeman BA. Reactive oxygen species in human health and disease.
- 57 *Nutrition* 2001;17(2):161-65. doi: 10.1016/S0899-9007(00)00570-0
- 58
- 59 38. Lachance PA, Nakat Z, Jeong WS. Antioxidants: An integrative approach.
- 60 *Nutrition* 2001;17(10):835-38. doi: 10.1016/S0899-9007(01)00636-0
39. Ruttkay-Nedecky B, Nejdil L, Gumulec J, et al. The role of metallothionein in oxidative stress. *Int J Mol Sci* 2013;14(3):6044-66. doi: 10.3390/ijms14036044 [published Online First: 2013/03/19]
40. Prasad AS. Zinc: an antioxidant and anti-inflammatory agent: role of zinc in degenerative disorders of aging. *J Trace Elem Med Biol* 2014;28(4):364-

- 1  
2  
3 71. doi: 10.1016/j.jtemb.2014.07.019 [published Online First:  
4 2014/09/10]  
5  
6 41. Frat JP, Ricard JD, Quenot JP, et al. Non-invasive ventilation versus high-flow  
7 nasal cannula oxygen therapy with apnoeic oxygenation for  
8 preoxygenation before intubation of patients with acute hypoxaemic  
9 respiratory failure: a randomised, multicentre, open-label trial. *Lancet*  
10 *Respir Med* 2019;7(4):303-12. doi: 10.1016/s2213-2600(19)30048-7  
11 [published Online First: 2019/03/23]  
12  
13 42. He H, Sun B, Liang L, et al. A multicenter RCT of noninvasive ventilation in  
14 pneumonia-induced early mild acute respiratory distress syndrome. *Crit*  
15 *Care* 2019;23(1):300. doi: 10.1186/s13054-019-2575-6 [published  
16 Online First: 2019/09/06]  
17  
18 43. Pennisi MA, Bello G, Congedo MT, et al. Early nasal high-flow versus Venturi  
19 mask oxygen therapy after lung resection: a randomized trial. *Crit Care*  
20 2019;23(1):68. doi: 10.1186/s13054-019-2361-5 [published Online First:  
21 2019/03/02]  
22  
23  
24  
25  
26  
27  
28  
29  
30  
31  
32  
33  
34  
35  
36  
37  
38  
39  
40  
41  
42  
43  
44  
45  
46  
47  
48  
49  
50  
51  
52  
53  
54  
55  
56  
57  
58  
59  
60

Table 1: Primary and secondary outcomes

| Key Primary Outcome                                                                                                                                                          | Key Secondary Outcomes                                                                                                                                                                                                                                                                                                                                                                                                                                                                                                                               |
|------------------------------------------------------------------------------------------------------------------------------------------------------------------------------|------------------------------------------------------------------------------------------------------------------------------------------------------------------------------------------------------------------------------------------------------------------------------------------------------------------------------------------------------------------------------------------------------------------------------------------------------------------------------------------------------------------------------------------------------|
| Mean change in the highest level of oxygenation (oxygen flow measured litre/min) in non-ventilated patients<br>Mean change in lowest PaO <sub>2</sub> in ventilated patients | Mortality (ICU or in-hospital)<br>Duration of mechanical ventilation<br>Duration of oxygen therapy<br>Duration of hospitalisation<br>Length of Stay in ICU                                                                                                                                                                                                                                                                                                                                                                                           |
| Other Secondary Outcomes                                                                                                                                                     |                                                                                                                                                                                                                                                                                                                                                                                                                                                                                                                                                      |
| Adverse Drug Events<br>Acute kidney injury<br>Acute liver injury<br>Duration of vasopressor drugs<br>Sequential Organ Failure Assessment (SOFA) respiratory score            | Clinical improvement based on an eight-point ordinal scale recommended in the document published by WHO R&D Blueprint "Novel Coronavirus COVID-19 Therapeutic Trial Synopsis". <ul style="list-style-type: none"> <li>• Percentage of patients reporting each severity rating on an 8-point ordinal scale [Time Frame: Day 14]</li> <li>• Time to improvement in one category from admission using the 8-point ordinal scale [ Time Frame: Up to day 28]</li> <li>• Mean change in the 8-point ordinal scale [ Time Frame: Up to day 28 ]</li> </ul> |

1  
2  
3  
4  
5  
6  
7  
8  
9  
10  
11  
12  
13  
14  
15  
16  
17  
18  
19  
20  
21  
22  
23  
24  
25  
26  
27  
28  
29  
30  
31  
32  
33  
34  
35  
36  
37  
38  
39  
40  
41  
42  
43  
44  
45  
46

Table 2: inclusion and exclusion criteria

| Inclusion criteria                                                                                                                                                                                                                                                                                                                                                                                                                                                                                                                                                                                                                                                                                                                                                                                                                                                                                                                                                                                                                                                                     | Exclusion criteria                                                                                                                                                                                                                                                                                                                                                                                                                                                                                                                                                                                                                                                                                                                                                                                                                                                                                                                                                                                                                                                                                                                                                                                                                                                                                                                                                                                                                                     |
|----------------------------------------------------------------------------------------------------------------------------------------------------------------------------------------------------------------------------------------------------------------------------------------------------------------------------------------------------------------------------------------------------------------------------------------------------------------------------------------------------------------------------------------------------------------------------------------------------------------------------------------------------------------------------------------------------------------------------------------------------------------------------------------------------------------------------------------------------------------------------------------------------------------------------------------------------------------------------------------------------------------------------------------------------------------------------------------|--------------------------------------------------------------------------------------------------------------------------------------------------------------------------------------------------------------------------------------------------------------------------------------------------------------------------------------------------------------------------------------------------------------------------------------------------------------------------------------------------------------------------------------------------------------------------------------------------------------------------------------------------------------------------------------------------------------------------------------------------------------------------------------------------------------------------------------------------------------------------------------------------------------------------------------------------------------------------------------------------------------------------------------------------------------------------------------------------------------------------------------------------------------------------------------------------------------------------------------------------------------------------------------------------------------------------------------------------------------------------------------------------------------------------------------------------------|
| <ul style="list-style-type: none"> <li>• Consenting adult patients adult male or female, age ≥ 18 years old. Laboratory-confirmed SARS-CoV-2 infection as determined by polymerase chain reaction (PCR) or another commercial or public health assay</li> <li>• Hospitalized with an illness of any duration with evidence of pneumonia and severe disease, critical disease, or multi-system organ dysfunction at baseline</li> <li>• Ability to provide informed consent signed by study patient or legally acceptable representative</li> <li>• Willingness and ability to comply with study-related procedures/assessments</li> <li>• Have an oxygen saturation (SaO<sub>2</sub>) of 94% or less while they were breathing ambient air or a ratio of the partial pressure of oxygen (PaO<sub>2</sub>) to the fraction of inspired oxygen (FiO<sub>2</sub>) (Pao<sub>2</sub>: Fio<sub>2</sub>) at or below 300 mg Hg.</li> <li>• No chronic kidney disease (CKD) defined by stage II or higher using the Kidney Disease Improving Global Outcomes (KDIGO) classification</li> </ul> | <ul style="list-style-type: none"> <li>• Age &lt;18 or pregnant or lactating female</li> <li>• Allergy to zinc</li> <li>• Severe hepatic impairment defined as Child C liver disease.</li> <li>• eGFR ≤ 60 mL/min/1.73 m<sup>2</sup> (defined using CKD-EPI SCr formula)</li> <li>• History of any organ transplant which requires active immunosuppressive treatment which can interfere with kidney function</li> <li>• If a patient required any of the following within seven days prior to cardiac surgery: defibrillation, mechanical ventilation, left ventricular assist device (LVAD), or other forms of mechanical circulatory support (MCS)</li> <li>• If a patient required cardiopulmonary resuscitation (CPR) within 14 days</li> <li>• DNR (do not resuscitate) DNI (do not intubate) orders</li> <li>• Death is deemed imminent or inevitable during this admission, and either the attending physician, patient or substitute decision-maker is not committed to active treatment</li> <li>• Already receiving dialysis (either acute or chronic) or imminent need of dialysis at the time of enrolment</li> <li>• Patients with known HIV infection</li> <li>• Patients with a known or suspected history of oxalate nephropathy or hyperoxaluria, scurvy, chronic iron overload, G-6PD deficiency</li> <li>• Clinician expects to prescribe Zinc for another indication</li> <li>• Patients with known haemochromatosis.</li> </ul> |

Table 3: Collected data during trial

|                                               | All patients                                                                                                                                                                                                                                                                                                                                                                                                                                                                                                                                                                                                                                                     |                                                                                                                                                                                                                                                                                                                                                                                                                                                                                                                                                                                                                                                                           |
|-----------------------------------------------|------------------------------------------------------------------------------------------------------------------------------------------------------------------------------------------------------------------------------------------------------------------------------------------------------------------------------------------------------------------------------------------------------------------------------------------------------------------------------------------------------------------------------------------------------------------------------------------------------------------------------------------------------------------|---------------------------------------------------------------------------------------------------------------------------------------------------------------------------------------------------------------------------------------------------------------------------------------------------------------------------------------------------------------------------------------------------------------------------------------------------------------------------------------------------------------------------------------------------------------------------------------------------------------------------------------------------------------------------|
| Baseline data                                 | Baseline data <ul style="list-style-type: none"> <li>• Demographics: Age, gender, place of residence</li> <li>• Comorbidities: Diabetes mellitus, arterial hypertension, congestive heart failure, chronic obstructive airways disease, chronic liver disease, malignancy, chronic renal failure</li> <li>• Pre-admission medication - ? esp ACEi / A2RB</li> <li>• Functional status / frailty score</li> </ul>                                                                                                                                                                                                                                                 |                                                                                                                                                                                                                                                                                                                                                                                                                                                                                                                                                                                                                                                                           |
|                                               | Non-ventilated patients                                                                                                                                                                                                                                                                                                                                                                                                                                                                                                                                                                                                                                          | Ventilated patients                                                                                                                                                                                                                                                                                                                                                                                                                                                                                                                                                                                                                                                       |
| Daily observations                            | <ul style="list-style-type: none"> <li>• Daily saturations (Worst values)</li> <li>• Daily oxygen flow</li> <li>• Fluid input</li> <li>• Urine output</li> <li>• Fluid balance</li> </ul>                                                                                                                                                                                                                                                                                                                                                                                                                                                                        | <ul style="list-style-type: none"> <li>• Daily PaO<sub>2</sub>/FiO<sub>2</sub> ratio</li> <li>• Daily oxygen flow</li> <li>• Fluid input</li> <li>• Urine output</li> <li>• Fluid balance</li> <li>• Vasopressor data</li> </ul>                                                                                                                                                                                                                                                                                                                                                                                                                                          |
| Laboratory investigations (collected at 0800) | <ul style="list-style-type: none"> <li>• Daily serum creatinine</li> <li>• Daily liver function</li> <li>• Daily blood count</li> <li>• Daily Zinc and trace metal concentration</li> <li>• Daily Cardiac troponin</li> <li>• Daily lactate level</li> </ul>                                                                                                                                                                                                                                                                                                                                                                                                     | <ul style="list-style-type: none"> <li>• Daily serum creatinine</li> <li>• Daily liver function</li> <li>• Daily blood count</li> <li>• Daily Zinc and trace metal concentration</li> <li>• Daily Cardiac troponin</li> <li>• Daily lactate level</li> </ul>                                                                                                                                                                                                                                                                                                                                                                                                              |
| Primary outcome measures                      | <ul style="list-style-type: none"> <li>• Mean change in highest level of oxygenation requirement (oxygen flow in litres/min)</li> </ul>                                                                                                                                                                                                                                                                                                                                                                                                                                                                                                                          | <ul style="list-style-type: none"> <li>• Mean change in lowest PaO<sub>2</sub>/FiO<sub>2</sub> ratio (in mmHg)</li> </ul>                                                                                                                                                                                                                                                                                                                                                                                                                                                                                                                                                 |
| Secondary outcome measures                    | <ul style="list-style-type: none"> <li>• Mortality [Time Frame: Up to day 28]</li> <li>• Duration of oxygen therapy (days)</li> <li>• Duration of hospitalization (days)</li> <li>• Length of stay in the intensive care unit and hospital</li> <li>• Frequency of Serious Adverse Drug Events</li> <li>• Acute kidney injury</li> <li>• Acute liver injury</li> <li>• Time to resolution of fever for at least 48 hours without antipyretics by clinical severity</li> <li>• Incidence of severe or life-threatening bacterial, invasive fungal, or opportunistic infection</li> <li>• Number of patients admitted into an intensive care unit (ICU)</li> </ul> | <ul style="list-style-type: none"> <li>• Mortality [Time Frame: Up to day 28]</li> <li>• Duration of mechanical ventilation(days)</li> <li>• Duration of oxygen therapy (days)</li> <li>• Duration of hospitalization (days)</li> <li>• Length of stay in the intensive care unit and hospital</li> <li>• Frequency of Serious Adverse Drug Events</li> <li>• Acute kidney injury</li> <li>• Acute liver injury</li> <li>• Use, duration and dosage of vasopressor drugs</li> <li>• Time to resolution of fever for at least 48 hours without antipyretics by clinical severity</li> <li>• Incidence of severe or life-threatening bacterial, invasive fungal,</li> </ul> |

1  
2  
3  
4  
5  
6  
7  
8  
9  
10  
11  
12  
13  
14  
15  
16  
17  
18  
19  
20  
21  
22  
23  
24  
25  
26  
27  
28  
29  
30  
31  
32  
33  
34  
35  
36  
37  
38  
39  
40  
41  
42  
43  
44  
45  
46

|  |                                                                                                                                                                                                                                                                                                                                                                                                                                                                                                                                                                                                                                                                                                                                                                                                                                |                                                                                                                                                                                                                                                                                                                                                                                                                                                                                                                                                                                                                                                                                                                                                                                                                                                                                                                                      |
|--|--------------------------------------------------------------------------------------------------------------------------------------------------------------------------------------------------------------------------------------------------------------------------------------------------------------------------------------------------------------------------------------------------------------------------------------------------------------------------------------------------------------------------------------------------------------------------------------------------------------------------------------------------------------------------------------------------------------------------------------------------------------------------------------------------------------------------------|--------------------------------------------------------------------------------------------------------------------------------------------------------------------------------------------------------------------------------------------------------------------------------------------------------------------------------------------------------------------------------------------------------------------------------------------------------------------------------------------------------------------------------------------------------------------------------------------------------------------------------------------------------------------------------------------------------------------------------------------------------------------------------------------------------------------------------------------------------------------------------------------------------------------------------------|
|  | <p>[Time Frame: Up to day 28]</p> <ul style="list-style-type: none"> <li>• Sequential Organ Failure Assessment (SOFA) Respiratory Score [Time Frame: 28 days]. Assigned a point value from 0 (normal) to 4 (high degree of dysfunction/failure)</li> <li>• Clinical improvement based on an eight-point ordinal scale recommended in the document published by WHO R&amp;D Blueprint “Novel Coronavirus COVID-19 Therapeutic Trial Synopsis”. <ul style="list-style-type: none"> <li>○ Percentage of patients reporting each severity rating on an 8-point ordinal scale [Time Frame: Day 14]</li> <li>○ Time to improvement in one category from admission using the 8-point ordinal scale [ Time Frame: Up to day 28]</li> <li>○ Mean change in the 8-point ordinal scale [ Time Frame: Up to day 28]</li> </ul> </li> </ul> | <p>or opportunistic infection</p> <ul style="list-style-type: none"> <li>• Number of patients admitted into an intensive care unit (ICU) [Time Frame: Up to day 28]</li> <li>• Sequential Organ Failure Assessment (SOFA) Respiratory Score [Time Frame: 28 days]. Assigned a point value from 0 (normal) to 4 (high degree of dysfunction/failure)</li> <li>• Clinical improvement based on an eight-point ordinal scale recommended in the document published by WHO R&amp;D Blueprint “Novel Coronavirus COVID-19 Therapeutic Trial Synopsis”. <ul style="list-style-type: none"> <li>○ Percentage of patients reporting each severity rating on an 8-point ordinal scale [Time Frame: Day 14]</li> <li>○ Time to improvement in one category from admission using the 8-point ordinal scale [ Time Frame: Up to day 28 ]</li> <li>○ Mean change in the 8-point ordinal scale [ Time Frame: Up to day 28 ]</li> </ul> </li> </ul> |
|--|--------------------------------------------------------------------------------------------------------------------------------------------------------------------------------------------------------------------------------------------------------------------------------------------------------------------------------------------------------------------------------------------------------------------------------------------------------------------------------------------------------------------------------------------------------------------------------------------------------------------------------------------------------------------------------------------------------------------------------------------------------------------------------------------------------------------------------|--------------------------------------------------------------------------------------------------------------------------------------------------------------------------------------------------------------------------------------------------------------------------------------------------------------------------------------------------------------------------------------------------------------------------------------------------------------------------------------------------------------------------------------------------------------------------------------------------------------------------------------------------------------------------------------------------------------------------------------------------------------------------------------------------------------------------------------------------------------------------------------------------------------------------------------|

# BMJ Open

## A randomised controlled trial for high-dose intravenous zinc as adjunctive therapy in SARS-CoV-2 (COVID-19) positive critically ill patients: trial protocol

|                                 |                                                                                                                                                                                                                                                                                                                                                                                                                                                                                                                                                                                                                                                                                                               |
|---------------------------------|---------------------------------------------------------------------------------------------------------------------------------------------------------------------------------------------------------------------------------------------------------------------------------------------------------------------------------------------------------------------------------------------------------------------------------------------------------------------------------------------------------------------------------------------------------------------------------------------------------------------------------------------------------------------------------------------------------------|
| Journal:                        | <i>BMJ Open</i>                                                                                                                                                                                                                                                                                                                                                                                                                                                                                                                                                                                                                                                                                               |
| Manuscript ID                   | bmjopen-2020-040580.R1                                                                                                                                                                                                                                                                                                                                                                                                                                                                                                                                                                                                                                                                                        |
| Article Type:                   | Protocol                                                                                                                                                                                                                                                                                                                                                                                                                                                                                                                                                                                                                                                                                                      |
| Date Submitted by the Author:   | 02-Sep-2020                                                                                                                                                                                                                                                                                                                                                                                                                                                                                                                                                                                                                                                                                                   |
| Complete List of Authors:       | Perera, Marlon; Austin Health, Department of Surgery<br>El Khoury, John; Austin Health, Department of Surgery<br>Chinni, Vidyasagar; Austin Health, Department of Surgery<br>Bolton, Damien ; Austin Health, Department of Surgery<br>Qu, Liang; Austin Health, Department of Surgery<br>Johnson, Paul; Austin Health, Infectious Diseases<br>Trubiano, Jason ; Austin Health, Infectious Diseases<br>McDonald, Christine; Austin Health, Respiratory and Sleep Medicine<br>Jones, Daryl; Austin Health, Intensive Care Unit Austin Hospital<br>Bellomo, Rinaldo; Austin Health, Intensive Care<br>Patel, Oneel; Austin Health, Department of Surgery<br>Ischia, Joseph; Austin Health, Department of Surgery |
| <b>Primary Subject Heading</b>: | Infectious diseases                                                                                                                                                                                                                                                                                                                                                                                                                                                                                                                                                                                                                                                                                           |
| Secondary Subject Heading:      | Intensive care, Pharmacology and therapeutics, Public health, Infectious diseases, Global health                                                                                                                                                                                                                                                                                                                                                                                                                                                                                                                                                                                                              |
| Keywords:                       | Respiratory infections < THORACIC MEDICINE, VIROLOGY, INFECTIOUS DISEASES, PUBLIC HEALTH, Public health < INFECTIOUS DISEASES                                                                                                                                                                                                                                                                                                                                                                                                                                                                                                                                                                                 |
|                                 |                                                                                                                                                                                                                                                                                                                                                                                                                                                                                                                                                                                                                                                                                                               |

SCHOLARONE™  
Manuscripts





I, the Submitting Author has the right to grant and does grant on behalf of all authors of the Work (as defined in the below author licence), an exclusive licence and/or a non-exclusive licence for contributions from authors who are: i) UK Crown employees; ii) where BMJ has agreed a CC-BY licence shall apply, and/or iii) in accordance with the terms applicable for US Federal Government officers or employees acting as part of their official duties; on a worldwide, perpetual, irrevocable, royalty-free basis to BMJ Publishing Group Ltd ("BMJ") its licensees and where the relevant Journal is co-owned by BMJ to the co-owners of the Journal, to publish the Work in this journal and any other BMJ products and to exploit all rights, as set out in our [licence](#).

The Submitting Author accepts and understands that any supply made under these terms is made by BMJ to the Submitting Author unless you are acting as an employee on behalf of your employer or a postgraduate student of an affiliated institution which is paying any applicable article publishing charge ("APC") for Open Access articles. Where the Submitting Author wishes to make the Work available on an Open Access basis (and intends to pay the relevant APC), the terms of reuse of such Open Access shall be governed by a Creative Commons licence – details of these licences and which [Creative Commons](#) licence will apply to this Work are set out in our licence referred to above.

Other than as permitted in any relevant BMJ Author's Self Archiving Policies, I confirm this Work has not been accepted for publication elsewhere, is not being considered for publication elsewhere and does not duplicate material already published. I confirm all authors consent to publication of this Work and authorise the granting of this licence.

1  
2  
3 **A randomised controlled trial for high-dose intravenous zinc as adjunctive therapy in**  
4 **SARS-CoV-2 (COVID-19) positive critically ill patients: trial protocol**  
5  
6  
7

8 Marlon Perera<sup>1</sup>, John El-Khoury<sup>1</sup>, Vidyasagar Chinni<sup>1</sup>, Damien Bolton<sup>1</sup>, Liang Qu<sup>1</sup>, Paul  
9 Johnson<sup>2</sup>, Jason Trubiano<sup>2</sup>, Christine F. McDonald<sup>3,4</sup>, Daryl Jones<sup>4</sup>, Rinaldo Bellomo<sup>4</sup>, Oneel  
10 Patel<sup>1</sup>, Joseph Ischia<sup>1</sup>  
11  
12  
13

- 14  
15 1. Department of Surgery, University of Melbourne, Austin Health, Victoria, 3084  
16 2. Department of Infectious disease, Austin Health, Victoria, 3084  
17 3. Department of Respiratory and Sleep Medicine, Austin Health, Victoria, 3084  
18 4. Department of Medicine, University of Melbourne, Victoria 3084  
19 5. Department of Intensive Care, University of Melbourne, Austin Health, Victoria, 3084  
20  
21  
22  
23

24  
25 Please Address Correspondence to:

26 Dr Marlon Perera

27 Department of Surgery, Austin Health, Victoria, Australia

28 E: marlonlperera@gmail.com  
29  
30  
31

32  
33 Keywords: randomized controlled trial, trial protocol, zinc, COVID, respiratory medicine  
34  
35

36 Disclosure: Nil financial interests

37 This manuscript is original and has not been submitted to any alternate journals  
38  
39  
40  
41  
42  
43  
44  
45  
46  
47  
48  
49  
50  
51  
52  
53  
54  
55  
56  
57  
58  
59  
60

## **Abstract**

### Introduction

SARS-CoV-2 (COVID19) has caused an international pandemic of respiratory illness, resulting in significant healthcare and economic turmoil. To date, no robust vaccine or treatment has been identified. Elemental zinc has previously been demonstrated to have beneficial effects on coronaviruses and other viral respiratory infections due to its effect on RNA polymerase. Additionally, zinc has well demonstrated protective effects against hypoxic injury – a clear mechanism of end-organ injury in respiratory distress syndrome. We aimed to assess the effect of high dose intravenous zinc (HDIVZn) on SARS-CoV-2 infection. The end of study analyses will evaluate the reduction of impact of oxygen saturations or requirement of oxygen supplementation.

### Methods and Analysis

We designed a double-blind randomised controlled trial of daily HDIVZn (0.5mg/kg) versus placebo. Primary outcome measures are lowest oxygen saturation (or greatest level of supplemental oxygenation) for non-ventilated patients and worst PaO<sub>2</sub>/FiO<sub>2</sub> for ventilated patients. Following power calculations, 60 hospitalised patients and 100 ventilated patients will be recruited to demonstrate a 20% difference. The duration of follow-up is up to the point of discharge.

### Ethics and dissemination

Ethical approval was obtained through the independent Human Research Ethics Committee. Participant recruitment will commence in May 2020. Results will be published in peer-reviewed medical journals.

### Trial Registration

Clinical trial registered with Australian New Zealand Clinical Trials Registry (ACTRN126200000454976). No external funding was sought for the completion of this project.

1  
2  
3  
4  
5 **Strengths and Limitations of this study**  
6

- 7
- 8 • COVID19 associated respiratory infection results in severe respiratory distress  
9 syndrome and potentially death
  - 10 • High dose zinc has previously demonstrated efficacy in patients with alternate  
11 corona virus infection and further demonstrates protection in end-organ hypoxia  
12
  - 13 • This study aims to determine the efficacy of high dose intra-venous zinc on  
14 respiratory and end-organ outcomes in patients infected with COVID19  
15
  - 16 • We designed a double-blind placebo-controlled randomised clinical trial with well-  
17 defined universal outcome measures  
18
  - 19 • Limitations pertain to conducting the current study in Australia, a country with a  
20 relatively low prevalence of COVID19  
21  
22  
23  
24  
25  
26  
27  
28  
29  
30  
31  
32  
33  
34  
35  
36  
37  
38  
39  
40  
41  
42  
43  
44  
45  
46  
47  
48  
49  
50  
51  
52  
53  
54  
55  
56  
57  
58  
59  
60

## **Introduction**

Since December 2019, a new coronavirus, designated SARS-CoV-2, has caused an international pandemic of respiratory illness termed COVID19, posing significant threats to global health and the economy<sup>1-3</sup>. In more severe cases, COVID19 enters the lungs, causing respiratory complications such as bronchitis and pneumonia<sup>4,5</sup>. Development of pneumonia leads to a reduced ability for oxygenation and in some cases the development of acute respiratory distress syndrome (ARDS), requiring mechanical ventilation. In the most severe cases, patients can develop multiple organ failure and hypoxic brain injury. In the absence of an effective vaccine or robust treatment for people with the disease<sup>6</sup>, there is an urgent need to find a treatment that inhibits virus replication or reduces the progression of the disease.

Zinc is a naturally occurring essential heavy metal, and zinc deficiency is associated with a range of pathological conditions, including retarded growth and delayed wound healing and tissue repair. Zinc is also important for the maintenance and development of the immune system and plays a role in cell division and growth. Zinc deficiency results in reduced immunity and increases susceptibility to infectious diseases<sup>7,8</sup>. Numerous studies report the potential of zinc and zinc salts to inhibit viral infections in clinical and experimental settings. Viral infections that have been successfully inhibited by zinc include the common cold (a type of coronavirus)<sup>9</sup>, respiratory syncytial virus infections<sup>10</sup>, cytomegalovirus infections<sup>11</sup> and herpes labialis<sup>12</sup>. More importantly, zinc is a potent inhibitor of the replication of SARS-coronavirus (SARS-CoV) and equine arteritis virus (EAV) in cell culture<sup>13</sup>.

Furthermore, our published studies have shown that high dose intravenous zinc (HDIVZn) protects various organs, including the heart, kidneys and liver against the damage caused by hypoxia<sup>7,14-16</sup>. In addition to being efficacious, the dose of elemental zinc used for this HDIVZn trial (0.25mg/kg (0.5mg/kg ZnCl<sub>2</sub>)) and applied in our preclinical study in sheep is very safe and well-tolerated in humans as verified from multiple observational reports including the treatment of very sick children in an ICU setting with suspected zinc deficiency<sup>17-20</sup>.

We plan to perform a single site randomised controlled trial to test the efficacy and safety of HDIVZn administered as a daily injection in subjects with COVID19 infection to assess whether giving HDIVZn to patients improves clinical outcomes.

## **Methods and Design**

Ethical approval was sought through the Austin Health institutional Human Research Ethics Committee. This clinical trial was registered with Australian New Zealand Clinical Trials Registry (ACTRN126200000454976). The protocol design was produced in adherence with the Standard Protocol Items for Randomised Trials (SPIRIT) <sup>21</sup>. No external funding was sought for the completion of this project.

### *Patient and public involvement*

The development of the research question stemmed from the urgent global crisis inflicted by COVID19, and the urgent need for a therapy to reduce the impact of the disease on the affected patients. Patients were not intrinsically involved in the design, recruitment or conduct of the study. Results of the study will be disseminated to patients after publication in peer-review journal. While the burden of the treatment or placebo was not assessed directly by patients, it was deemed minimal due to the lack of deviation from standard care.

### *Study design*

This is a Phase 2, double-blind, placebo-controlled, randomised study at a single institution. The study plans to randomise 160 hospitalised participants, including 100 critically-ill patients with confirmed COVID19 (as detailed in Table 2) and to evaluate the efficacy and safety of HDIVZn over a seven-day period of treatment.

### *Dosing rationale*

The upper limit for daily zinc intake in an adult is 40mg <sup>22</sup>. However, when 30 mg of elemental zinc was given orally to humans, it resulted in an only 1.8-fold increase in plasma zinc in the first 4 hours <sup>23</sup>. A similar study in humans where elemental zinc (30 mg/d) or placebo were given orally for six months showed a statistically significant increase in the plasma zinc from  $14.18 \pm 1.75 \mu\text{mol/L}$  in the placebo group to  $17.18 \pm 3.48 \mu\text{mol/L}$  in the zinc group <sup>24</sup>. Oral delivery of zinc is affected by several factors, including normal variations in gut zinc absorption, dietary factors such as the presence of phytate, and interactions with other metal ions <sup>25</sup>. Also, repeated high oral zinc intake causes a rapid and significant upregulation of intestinal metallothioneins which markedly decrease subsequent gut zinc, and importantly copper, absorption <sup>26</sup>. The latter may lead to copper deficiency in patients

1  
2  
3 administered zinc for prolonged periods.  
4

5 In our recently published sheep study, we determined that a single IV dose of ZnCl<sub>2</sub>  
6 at 0.5mg/kg increased the plasma zinc concentration by 4-fold from a baseline  
7 concentration of 11.3 ± 0.4 µmol/L to 46.5 ± 1.5 µmol/L within two hours<sup>14</sup>. Interestingly,  
8 two doses of IV ZnCl<sub>2</sub> at 0.5mg/kg increased the plasma zinc concentration 7-fold from a  
9 baseline concentration of 11.3 ± 0.4 µmol/L to 70.1 ± 5.8 µmol/L.  
10  
11  
12

13 Translation of a drug's dose from animals to humans depends on the drug dose  
14 correction factor (K<sub>m</sub>) which is calculated by dividing the average body weight (kg) of a  
15 species by its body surface area (m<sup>2</sup>). For humans, K<sub>m</sub> is 37<sup>27</sup>. Direct carryover of a drug's  
16 pharmacologic dosage, from animals to humans depends on how similar the K<sub>m</sub> value of the  
17 animal species in which efficacy was tested, is to human K<sub>m</sub>. As published by Nair et al<sup>27</sup>, K<sub>m</sub>  
18 for rats is 6, for rabbits is 12 and for sheep is 36 (average body weight of sheep is 40kg, and  
19 body surface area is 1.10m<sup>2</sup><sup>28</sup>). Therefore, the near similar K<sub>m</sub> value of sheep (36) to that of  
20 humans (37) has allowed us to conclude that human equivalent elemental zinc dosage  
21 would equate to 0.25mg/kg, the same dose that was shown to be protective in the sheep  
22 study and which we plan to use in our proposed trial.  
23  
24  
25  
26  
27  
28  
29

30 Information regarding the safety of HDIVZn can be derived from published reports  
31 where humans were treated with high doses of zinc<sup>17-20</sup>. The estimated elemental HDIVZn  
32 dosage for an average 70kg human to be used in our proposed study will be 0.25mg/d x  
33 70kg=17mg/d. Elemental zinc has been administered at a substantially higher dose (ranging  
34 from 26.4 to 37.5mg/d for eight successive days) in the treatment of human burns without  
35 any side effects<sup>17-19</sup>. In fact, zinc at doses ranging from 5-22mg/d has been administered in  
36 humans routinely as a component of parenteral nutrition without any reported side effects  
37<sup>29</sup>. Furthermore, a recently published phase I clinical trial in critically ill children with  
38 suspected zinc deficiency involved administration of zinc intravenously at a dose 3-times  
39 higher than is proposed in the current study (0.75mg/kg/d for seven days), without any  
40 adverse effects<sup>20</sup>.  
41  
42  
43  
44  
45  
46  
47  
48

49 The duration of daily dosing in the current trial was based on previous research  
50 assessing dose escalation of intravenous supplemental zinc<sup>20</sup>. This dose escalation study in  
51 pediatric critical illness highlighted that with sufficiently high doses of intravenous zinc, a  
52 treatment course of seven days resulted in increases of serum zinc.  
53  
54  
55  
56

## 57 **Participants and Randomisation**

### 58 *Eligibility*

59  
60

1  
2  
3 Patients will be eligible for randomisation in this study if they are consenting  
4 symptomatic hospitalized adult patients fulfilling World Health Organisation's case definition  
5 for COVID-19, including a positive polymerase chain reaction (PCR) for COVID19 from any  
6 specimen (e.g. respiratory, blood, urine, stool, other bodily fluid) within 14 days of  
7 presentation. Broadly speaking, patients included will be those with respiratory associated  
8 COVID19 disease. Patients with alternate acute respiratory pathology causing respiratory  
9 compromise, such as bacterial pneumonia, will not be deemed suitable for randomisation.  
10 Inclusion and exclusion criteria are summarised in Table 2. Patients enrolled in the current  
11 trial are eligible to be recruited in alternative trials and may receive other therapeutic  
12 interventions including dexamethasone or remdesivir.  
13  
14  
15  
16  
17  
18  
19  
20  
21

### 22 *Screening procedures*

23 The screening log is designed to monitor patient recruitment. A screening log will be  
24 maintained at the participating site by the research coordinator to document patients  
25 evaluated for enrolment. The log will provide a record of all patients assessed for eligibility  
26 and deemed ineligible for the study. When a patient is considered ineligible, the reason(s)  
27 will be noted on the log. The log will also be used to assess patient recruitment targets.  
28  
29  
30  
31  
32

### 33 *Randomization*

34 This study will be conducted as a randomised double-blinded placebo-controlled  
35 study using a stratified randomization method. Ward and ICU patients will be enrolled as  
36 soon as possible after fulfilling the criteria of stratification. Patients will be stratified based  
37 on whether they require mechanical ventilation. Thereafter, a permuted block  
38 randomisation method with variable block sizes of 2, 4 and 6 will be used to allocate eligible  
39 patients to either the treatment group, receiving HDIVZn or to the control group in a 1:1  
40 ratio. Randomisation will be performed by the randomisation module in Research Electronic  
41 Data Capture (REDCap, Vanderbilt University, USA), which is a secure web application for  
42 managing online data collection. Assessment of the unblinding procedures by the project  
43 research officer in the case of adverse event will be performed if necessary. The clinical staff  
44 involved in patient care will administer the trial drugs as soon as possible after enrolment.  
45  
46  
47  
48  
49  
50  
51  
52  
53  
54

### 55 *Study drug administration and blinding*

56 Pharmaceutical grade zinc chloride stock solution obtained from an Australian  
57 company (Phebra Pty Ltd, Lane Cove West, NSW, Australia) will be diluted in 250ml of  
58  
59  
60



1  
2  
3 normal saline and infused, resulting in a final dosage of 0.5mg/kg/d. Patients will be  
4 administered zinc daily for seven days. To standardise administration time, zinc infusions will  
5 commence in the early morning. Zinc will be administered via central venous or peripheral  
6 access over 3 hours. Zinc will be administered daily until either discharge or seven days of  
7 infusion (depending on which is sooner). The clinical trial nurse (allocation concealment) will  
8 use a web-based randomisation program to determine the allocation of patients and then  
9 prepare the coded zinc solution or placebo. Each coded solution bag, which will be  
10 indistinguishable irrespective of study group, will then be dispensed for administration to  
11 the patient as per protocol. This coded identifying study number will also be labelled on the  
12 patient case report form (CRF). The investigators, study coordinators, treating physicians,  
13 bedside nurses and patients/family will remain blinded to the allocated study solution.  
14  
15  
16  
17  
18  
19  
20  
21  
22

### 23 **Study assessment**

#### 24 *Study objective and endpoints*

25  
26 The endpoints of this study are listed in Table 1. The primary objective is to assess  
27 the effect of 7 days of HDIVZn on oxygenation in comparison with placebo in patients with  
28 confirmed COVID19. Specifically, oxygen saturations and the requirement of supplemental  
29 oxygenation (litres/minute) to maintain acceptable saturations will be measured at various  
30 timepoints in conjunction with measurement of routine observations. If applicable, the  
31 method of supplemental oxygenation provided will be recorded (eg. nasal prongs, Hudson  
32 mask). The primary outcome will be measured by either the highest level of supplemental  
33 oxygen (non-ventilated patients) or lowest PaO<sub>2</sub>/FiO<sub>2</sub> ratio in ventilated patients.  
34  
35  
36  
37  
38  
39

40 Secondary outcome measures include ICU and in-hospital mortality, length of stay in  
41 ICU or hospital, duration of supplemental oxygen, severe adverse drug events and changes  
42 based on WHO R&D Blueprint "Novel Coronavirus COVID19 Therapeutic Trial synopsis". The  
43 following is based on an eight-point ordinal scale consisting of:  
44  
45

- 46 0, not hospitalized, no clinical or virological evidence of infection;
  - 47 1, not hospitalized, Infected, and able to resume normal activities;
  - 48 2, not hospitalized, Infected, but unable to resume normal activities;
  - 49 3, hospitalized, no requirement of supplemental oxygen;
  - 50 4, hospitalized, requiring oxygen therapy via mask or nasal prongs;
  - 51 5, hospitalized, non-invasive ventilation, requiring high flow oxygen;
  - 52 6, hospitalized, intubation and mechanical ventilation
- 53  
54  
55  
56  
57  
58  
59  
60

- 1  
2  
3 7, hospitalized, requiring ECMO, invasive mechanical ventilation, additional organ  
4 support, RRT;  
5  
6 8, death;  
7  
8  
9

### 10 *Physical examination, measurements and laboratory tests*

11 All data will be collected by trained staff using a case report form (CRF) worksheet  
12 developed by the study team. Data will then be entered into the REDCap web database  
13 (electronic CRF [eCRF]). Randomised patients will be followed up to discharge, death or 28  
14 days post-randomisation whichever occurs first.  
15  
16  
17

18 Study day 1 commences on randomisation and concludes at the expiry of the  
19 calendar day. Data collection will be restricted primarily to those variables necessary to  
20 define clinical patient characteristics including baseline demographics, primary diagnoses,  
21 physiological parameters, diagnostic interventions, therapeutic interventions and  
22 documentation of deaths and other serious adverse events. A complete list of collected data  
23 is summarised in Table 3.  
24  
25  
26  
27  
28  
29

### 30 *Adverse events*

31 An adverse reaction is defined as any untoward and unintended response to an  
32 investigational medicinal product related to any dose administered. All adverse events  
33 judged by either the reporting investigator or the sponsor as having a reasonable possibility  
34 of a causal relationship to an investigational medicinal product will qualify as adverse  
35 reactions. Adverse events were classified per the Common Terminology Criteria for Adverse  
36 Events (CTCAE V5)<sup>30</sup>. All adverse events which are considered to be potentially causally  
37 related to the study intervention or are otherwise of concern in the investigator's judgement  
38 will be reported. An interim analysis is planned after 50% (80) of the patients have been  
39 randomised. Development of severe adverse events (Grade 4), such as severe kidney or  
40 hepatic injury, will result in cessation of the trial for the participant and all infusions related  
41 to the trial will be stopped. Additionally, the treatment will be discontinued in cases where  
42 the participant wishes to withdraw from the trial.  
43  
44  
45  
46  
47  
48  
49  
50  
51  
52

### 53 *Safety evaluations*

54 An independent Data Monitoring Committee (DMC), consisting of experts in  
55 intensive care, clinical research and biostatistics will be established before patient  
56 enrolment and will review all trial protocols. The role of the DMC will be to provide study  
57  
58  
59  
60

oversight to ensure that the rights and safety of patients involved in the study are protected by reviewing reported Adverse Events and making recommendations to the Management Committee (MC).

### **Study analysis**

#### *Sample size*

The primary outcome of this study is related to the effect of zinc therapy on the level of oxygenation expressed either as worst (highest) oxygen flow (in litres/min) in non-ventilated patients or worst (lowest) PaO<sub>2</sub> (in mmHg)/FiO<sub>2</sub> (as a fraction of 1) ratio in ventilated patients. We hypothesize that zinc therapy will decrease the worst level of oxygenation during the seven days (of the treatment period) by 20% compared to placebo from a mean worst value of 10L/min (placebo) to a mean of 8L/min (zinc) or for PaO<sub>2</sub>/FiO<sub>2</sub> ratio from a mean worst value of 150 (placebo) to a mean worst value of 180 (zinc). If patients transition from non-ventilated to ventilated during the study period, the PaO<sub>2</sub>/FiO<sub>2</sub> ratio will be used.

To have an 80% power to see such an effect at an alpha of 0.05 in non-ventilated patients, assuming a standard deviation (SD) for O<sub>2</sub> flow of 4L/min 28 patients would have to be randomized in each arm. In ventilated patients, to have an 80% power to see such an effect at an alpha of 0.05, assuming an SD for the PaO<sub>2</sub>/FiO<sub>2</sub> ratio of 60, 49 patients would have to be randomised in each arm.

Rounding off the first group to 30 per arm and the second group to 50 per arm to account for withdrawals, we estimate that a study of 160 patients would provide a suitable sample size to test our primary hypothesis.

#### *Statistical evaluation*

The descriptive analysis of the data will include the calculation of summary statistics including means, standard deviations, and absolute and relative frequencies of the baseline and follow-up data. If baseline variables are not approximately normally distributed, suitable transformations or medians with interquartile ranges will be presented. Any baseline variable differing by greater than 10% or 0.5 standard deviations between arms, will be subsequently investigated in a sensitivity analysis.

Any continuous variable outcomes that appear to be non-normal will be considered for transformation to improve normality of the residuals for subsequent regression analysis. Transformation will depend on: distribution of the variable, distribution of residuals, ease of

1  
2  
3 interpretation, and impact on main results. The co-primary outcome analyses will compare  
4 1) the change in highest level of supplemental oxygenation in non-ventilated patients, and 2)  
5 the change in lowest PaO<sub>2</sub>/FiO<sub>2</sub> ratio in ventilated patients through the use of multivariable  
6 linear regression. Secondary outcome analyses will involve a mix of linear, logistic, and  
7 ordinal logistic regression modelling. Assumptions of the relevant models will be checked  
8 along with alternative transformations or non-parametric methods as appropriate.  
9

10  
11  
12  
13 Tests of interaction between dichotomised variables and treatment pathway will be  
14 carried out to test for differing treatment effect between participants. Sensitivity analyses  
15 will be conducted to explore the robustness of the estimate of the effect. Analyses will  
16 include: complete case analysis; per-protocol analysis, adjustment for baseline, and  
17 adjustment for imbalance at baseline (if baseline measures differ substantially).  
18  
19

20  
21 A p-value 0.05 will indicate statistical significance. A full model with clinical relevant  
22 covariates (e.g. sex, age, previous heart surgery, preoperative creatinine) will be used for a  
23 stepwise backward variable selection procedure to identify independent risk factors for  
24 acute kidney injury (AKI). A senior statistician will perform data analysis on an intention-to-  
25 treat basis. An interim analysis on the safety and the primary outcomes will be performed  
26 when 50% (80/160) of the patients have received zinc or placebo for at least seven days.  
27 Summary statistics will be used to describe the clinical data and presented as mean ± SD,  
28 median with interquartile range (IQR) or percentages as appropriate. Chi-squared analysis  
29 with Fisher's exact test (when appropriate) and Student's t-test (Mann Whitney U test for  
30 non-normal distributions) will be used to compare data between the active treatment group  
31 and the control group with statistical significance declared for probability values of 0.05 or  
32 less. Analysis of the outcome of excluded patients due to other trials etc. will be in  
33 accordance with the CONSORT guidelines.  
34  
35  
36  
37  
38  
39  
40  
41  
42  
43  
44

## 45 **Discussion**

46  
47 This single centre, double-blind, randomised controlled trial will assess the role of  
48 HDIVZn in protection against the sequelae associated with SARS-CoV-2 virus. The beneficial  
49 effects of zinc on viral infections have been previously demonstrated<sup>31 32</sup>. Further, HDIVZn  
50 may provide additional protection to other end organs that may be indirectly affected by  
51 pulmonary injury and impaired oxygenation.  
52  
53

54  
55 In coronaviruses, zinc inhibits both the proteolytic processing of replicase  
56 polyproteins and the RNA-dependent RNA polymerase (RdRp) activity<sup>13</sup>. Although  
57 mechanisms of action of zinc are unknown, several possibilities exist. Firstly, DNA and RNA  
58  
59  
60

1  
2  
3 polymerases use divalent metal ions like  $Mg^{2+}$  as a co-factor, and one possible mechanism is  
4 that zinc displaces  $Mg^{2+}$  and subsequently inhibits RdRp activity<sup>33</sup>. In support is the  
5 observation that various divalent metals ions sustained the activity of poliovirus RdRp in the  
6 following preference  $Mn^{2+} > Co^{2+} > Ni^{2+} > Fe^{2+} > Mg^{2+} > Ca^{2+} > Cu^{2+}$ <sup>34</sup>. In contrast, zinc was  
7 incapable of sustaining RdRp catalyzed nucleotide incorporation<sup>34</sup>. Secondly, a zinc-binding  
8 pocket has been identified in the Dengue virus and SARS-coronavirus RdRp<sup>13</sup>. Therefore, it is  
9 possible that binding of zinc may induce a structural change in the conformation of RdRp  
10 which disables RdRp to catalyze nucleotide incorporation. Finally, adding high  
11 concentrations of zinc ions to cells impairs viral polyprotein processing which is integral to  
12 virus replication<sup>35</sup>.

13  
14  
15  
16  
17  
18  
19  
20 In addition to the direct effect on viral replication and activity, HDIVZn may play a  
21 protective role in alternate organs. Zinc has been demonstrated to be beneficial in reducing  
22 mortality in patients with severe pneumonia<sup>36</sup>. Further, in SARS-CoV-2, respiratory  
23 compromise results in impaired oxygenation and hypoxia to various end organs. Such  
24 hypoxia may contribute to end-organ failure and increase the risk of mortality. Specifically,  
25 such COVID19 associated hypoxia has been proposed to be contributory to cardiac injury<sup>37</sup>,  
26 hepatic injury<sup>38</sup> and renal injury<sup>39 40</sup>. Our published studies have shown that HDIVZn  
27 protects various organs, including the heart, kidneys and liver against the damage caused by  
28 hypoxia. It should be noted that hypoxia and oxidative stress, result in an increase in  
29 reactive oxygen species (ROS), including superoxide ( $O_2^-$ ), hydrogen peroxide ( $H_2O_2$ ) and  
30 hydroxyl radical ( $\cdot OH$ ) – which result in intracellular damage<sup>41 42</sup>. Zinc appears to limit ROS  
31 production by several mechanisms. Firstly, metallothioneins (MTs), small cysteine-rich and  
32 heavy metal-binding proteins, participate in the intracellular defence against reactive oxygen  
33 and nitrogen species<sup>43</sup> and zinc has been shown to induce MT mRNA and protein  
34 expression. Secondly, zinc competes with  $Fe^{2+}$  and  $Cu^{2+}$  ions for binding to cell membranes  
35 and proteins – normally, these active metals catalyze the production of hydroxyl radical  
36 from  $H_2O_2$  via Fenton chemistry. Thirdly, zinc upregulates the production and activation of  
37 antioxidant proteins, molecules and enzymes such as glutathione, catalase and superoxide  
38 dismutase (SOD), which catalyze  $O_2^-$  to oxygen or  $H_2O_2$ <sup>44</sup>. Finally, zinc reduces the activation  
39 of oxidant-promoting enzymes such as inducible nitric acid synthase and NADPH enzyme,  
40 which catalyze oxygen to  $O_2^-$ . Accordingly, we hypothesize that Zinc may provide protection  
41 against the hypoxic injury that critically ill patients with COVID19 may experience.

42  
43  
44  
45  
46  
47  
48  
49  
50  
51  
52  
53  
54  
55  
56  
57 The specific strengths of the current protocol design are a) prolonged exposure of  
58 HDIVZn and b) assessment of critically ill patients, a population where a benefit would be  
59  
60

1  
2  
3 observed if truly present. There is an inherent difficulty in assessing pulmonary response in  
4 clinical trials, and accordingly, the primary outcome measure is a possible criticism.  
5 However, maximal oxygen requirements and  $\text{PaO}_2/\text{FiO}_2$  are well established surrogate  
6 markers<sup>45 46</sup>, and have been used in recent comparable trials<sup>47-49</sup>.  
7  
8  
9

10 The safety of HDIVZn has been addressed in previous literature<sup>17-20</sup>. Elemental zinc  
11 has been administered at a substantially higher dose (ranging from 26.4 to 37.5mg/d for  
12 eight successive days) in the treatment of burns and did not produce any side effects in  
13 humans<sup>17-19</sup>. In the setting of critically ill patients, zinc intravenously at 3-times higher dose  
14 than the current study (0.75mg/kg/d for seven days) did not produce any adverse effects<sup>20</sup>.  
15  
16  
17

18 In conclusion, we designed a single-centre, double-blind, randomised controlled trial  
19 to assess the potential benefit of HDIVZn for hospitalised or critically ill patients with SARS-  
20 CoV-2 infection and associated respiratory compromise. We believe that our well-designed  
21 trial will be able to expediently identify a potential agent that may improve outcomes for  
22 these critically ill patients.  
23  
24  
25  
26  
27  
28  
29  
30  
31  
32  
33  
34  
35  
36  
37  
38  
39  
40  
41  
42  
43  
44  
45  
46  
47  
48  
49  
50  
51  
52  
53  
54  
55  
56  
57  
58  
59  
60

Contributors: MP assisted in protocol design, ethical submission and manuscript production. JEK and VC were involved in data collection and manuscript production. LQ was involved in statistical design and analysis. PJ, JT, CM were involved in patient care and study protocol design. DJ, DB, RB, OP and JI were involved in project design, patient care, manuscript production and supervision.

Competing interests: Nil

Funding: Nil

## References

1. Hu Y, Sun J, Dai Z, et al. Prevalence and severity of corona virus disease 2019 (COVID-19): A systematic review and meta-analysis. *J Clin Virol* 2020;127:104371. doi: 10.1016/j.jcv.2020.104371 [published Online First: 2020/04/22]
2. Tu H, Tu S, Gao S, et al. The epidemiological and clinical features of COVID-19 and lessons from this global infectious public health event. *J Infect* 2020 doi: 10.1016/j.jinf.2020.04.011 [published Online First: 2020/04/22]
3. Weston S, Frieman MB. COVID-19: Knowns, Unknowns, and Questions. *mSphere* 2020;5(2) doi: 10.1128/mSphere.00203-20 [published Online First: 2020/03/20]
4. Zhu J, Zhong Z, Li H, et al. CT imaging features of 4,121 patients with COVID-19: a meta-analysis. *J Med Virol* 2020 doi: 10.1002/jmv.25910 [published Online First: 2020/04/22]
5. Ledford H. How does COVID-19 kill? Uncertainty is hampering doctors' ability to choose treatments. *Nature* 2020;580(7803):311-12. doi: 10.1038/d41586-020-01056-7 [published Online First: 2020/04/11]
6. Wang Y, Zhang D, Du G, et al. Remdesivir in adults with severe COVID-19: a randomised, double-blind, placebo-controlled, multicentre trial. *The Lancet* 2020 doi: 10.1016/S0140-6736(20)31022-9
7. Ischia J, Bolton DM, Patel O. Why is it worth testing the ability of zinc to protect against ischaemia reperfusion injury for human application. *Metallomics* 2019;11(8):1330-43. doi: 10.1039/c9mt00079h
8. Prasad AS. Zinc is an Antioxidant and Anti-Inflammatory Agent: Its Role in Human Health. *Frontiers in nutrition* 2014;1:14.
9. Hulisz D. Efficacy of zinc against common cold viruses: an overview. *J Am Pharm Assoc* 2004;44(5):594-603. doi: 10.1331/1544-3191.44.5.594.hulisz [published Online First: 2004/10/22]
10. Suara RO, Crowe JE, Jr. Effect of zinc salts on respiratory syncytial virus replication. *Antimicrob Agents Chemother* 2004;48(3):783-90. doi: 10.1128/aac.48.3.783-790.2004 [published Online First: 2004/02/26]
11. Li D, Wen LZ, H Yu. [Observation on clinical efficacy of combined therapy of zinc supplement and jinye baidu granule in treating human cytomegalovirus infection]. *Zhongguo Zhong Xi Yi Jie He Za Zhi* 2005;25(5):449-51. [published Online First: 2005/06/17]



- 1  
2  
3  
4  
5  
6  
7  
8  
9  
10  
11  
12  
13  
14  
15  
16  
17  
18  
19  
20  
21  
22  
23  
24  
25  
26  
27  
28  
29  
30  
31  
32  
33  
34  
35  
36  
37  
38  
39  
40  
41  
42  
43  
44  
45  
46  
47  
48  
49  
50  
51  
52  
53  
54  
55  
56  
57  
58  
59  
60
12. Femiano F, Gombos F, Scully C. Recurrent herpes labialis: a pilot study of the efficacy of zinc therapy. *J Oral Pathol Med* 2005;34(7):423-5. doi: 10.1111/j.1600-0714.2005.00327.x [published Online First: 2005/07/14]
  13. te Velthuis AJ, van den Worm SH, Sims AC, et al. Zn(2+) inhibits coronavirus and arterivirus RNA polymerase activity in vitro and zinc ionophores block the replication of these viruses in cell culture. *PLoS Pathog* 2010;6(11):e1001176. doi: 10.1371/journal.ppat.1001176 [published Online First: 2010/11/17]
  14. O'Kane D, Gibson L, May CN, et al. Zinc preconditioning protects against renal ischaemia reperfusion injury in a preclinical sheep large animal model. *Biometals* 2018;31(5):821-34. doi: 10.1007/s10534-018-0125-3
  15. Rao K, Sethi K, Ischia J, et al. Protective effect of zinc preconditioning against renal ischemia reperfusion injury is dose dependent. *PLoS ONE* 2017;12(7):e0180028. doi: 10.1371/journal.pone.0180028
  16. Cheung E, Nikfarjam M, Jackett L, et al. The Protective Effect of Zinc Against Liver Ischaemia Reperfusion Injury in a Rat Model of Global Ischaemia. *Journal of Clinical and Experimental Hepatology* 2019;August 20, 2019, In press. doi: 10.1016/j.jceh.2019.07.006
  17. Berger MM, Baines M, Raffoul W, et al. Trace element supplementation after major burns modulates antioxidant status and clinical course by way of increased tissue trace element concentrations. *Am J Clin Nutr* 2007;85(5):1293-300. doi: 10.1093/ajcn/85.5.1293
  18. Berger MM, Binnert C, Chioloro RL, et al. Trace element supplementation after major burns increases burned skin trace element concentrations and modulates local protein metabolism but not whole-body substrate metabolism. *Am J Clin Nutr* 2007;85(5):1301-6. doi: 10.1093/ajcn/85.5.1301
  19. Berger MM, Spertini F, Shenkin A, et al. Trace element supplementation modulates pulmonary infection rates after major burns: a double-blind, placebo-controlled trial. *Am J Clin Nutr* 1998;68(2):365-71. doi: 10.1093/ajcn/68.2.365
  20. Cvijanovich NZ, King JC, Flori HR, et al. Safety and Dose Escalation Study of Intravenous Zinc Supplementation in Pediatric Critical Illness. *JPEN J Parenter Enteral Nutr* 2016;40(6):860-8. doi: 10.1177/0148607115572193
  21. Chan AW, Tetzlaff JM, Altman DG, et al. SPIRIT 2013 statement: defining standard protocol items for clinical trials. *Ann Intern Med* 2013;158(3):200-7. doi: 10.7326/0003-4819-158-3-201302050-00583 [published Online First: 2013/01/09]
  22. Institute of Medicine Panel on M. Dietary Reference Intakes for Vitamin A, Vitamin K, Arsenic, Boron, Chromium, Copper, Iodine, Iron, Manganese, Molybdenum, Nickel, Silicon, Vanadium, and Zinc. Washington (DC): National Academies Press (US)
- Copyright 2001 by the National Academy of Sciences. All rights reserved. 2001.
23. Solomons NW, Romero-Abal ME, Weiss G, et al. Bioavailability of zinc from NutriSet zinc tablets compared with aqueous zinc sulfate. *Eur J Clin Nutr* 2011;65(1):125-31. doi: 10.1038/ejcn.2010.198



- 1  
2  
3  
4  
5  
6  
7  
8  
9  
10  
11  
12  
13  
14  
15  
16  
17  
18  
19  
20  
21  
22  
23  
24  
25  
26  
27  
28  
29  
30  
31  
32  
33  
34  
35  
36  
37  
38  
39  
40  
41  
42  
43  
44  
45  
46  
47  
48  
49  
50  
51  
52  
53  
54  
55  
56  
57  
58  
59  
60
24. Feillet-Coudray C, Meunier N, Rambeau M, et al. Long-term moderate zinc supplementation increases exchangeable zinc pool masses in late-middle-aged men: the Zenith Study. *Am J Clin Nutr* 2005;82(1):103-10. doi: 10.1093/ajcn.82.1.103
  25. Keyzer JJ, Oosting E, Wolthers BG, et al. Zinc absorption after oral administration of zinc sulfate. *Pharm Weekbl Sci* 1983;5(5):252-3.
  26. Hempe JM, Carlson JM, Cousins RJ. Intestinal metallothionein gene expression and zinc absorption in rats are zinc-responsive but refractory to dexamethasone and interleukin 1 alpha. *J Nutr* 1991;121(9):1389-96.
  27. Nair AB, Jacob S. A simple practice guide for dose conversion between animals and human. *J Basic Clin Pharm* 2016;7(2):27-31. doi: 10.4103/0976-0105.177703
  28. Bennett JW. Regional Body Surface-Area of Sheep. *J Agric Sci* 1973;81(Dec):429-32. doi: Doi 10.1017/S0021859600086469
  29. Stehle P, Stoffel-Wagner B, Kuhn KS. Parenteral trace element provision: recent clinical research and practical conclusions. *Eur J Clin Nutr* 2016;70(8):886-93. doi: 10.1038/ejcn.2016.53
  30. Common Terminology Criteria for Adverse Events (CTCAE v5.0). *National Cancer Institute* 2017:[https://ctep.cancer.gov/protocolDevelopment/electronic\\_applications/docs/CTCAE\\_v5\\_Quick\\_Reference\\_8.5x11.pdf](https://ctep.cancer.gov/protocolDevelopment/electronic_applications/docs/CTCAE_v5_Quick_Reference_8.5x11.pdf).
  31. Science M, Johnstone J, Roth DE, et al. Zinc for the treatment of the common cold: a systematic review and meta-analysis of randomized controlled trials. *CMAJ* 2012;184(10):E551-61. doi: 10.1503/cmaj.111990 [published Online First: 2012/05/09]
  32. Bhatnagar S, Wadhwa N, Aneja S, et al. Zinc as adjunct treatment in infants aged between 7 and 120 days with probable serious bacterial infection: a randomised, double-blind, placebo-controlled trial. *Lancet* 2012;379(9831):2072-8. doi: 10.1016/S0140-6736(12)60477-2 [published Online First: 2012/06/05]
  33. Ferrari E, Wright-Minogue J, Fang JW, et al. Characterization of soluble hepatitis C virus RNA-dependent RNA polymerase expressed in *Escherichia coli*. *J Virol* 1999;73(2):1649-54. doi: 10.1128/jvi.73.2.1649-1654.1999 [published Online First: 1999/01/09]
  34. Arnold JJ, Ghosh SK, Cameron CE. Poliovirus RNA-dependent RNA polymerase (3D(pol)). Divalent cation modulation of primer, template, and nucleotide selection. *J Biol Chem* 1999;274(52):37060-9. doi: 10.1074/jbc.274.52.37060 [published Online First: 1999/12/22]
  35. Butterworth BE, Korant BD. Characterization of the large picornaviral polypeptides produced in the presence of zinc ion. *J Virol* 1974;14(2):282-91. [published Online First: 1974/08/01]
  36. Wang L, Song Y. Efficacy of zinc given as an adjunct to the treatment of severe pneumonia: A meta-analysis of randomized, double-blind and placebo-controlled trials. *Clin Respir J* 2018;12(3):857-64. doi: 10.1111/crj.12646 [published Online First: 2017/05/11]
  37. Zhu H, Rhee JW, Cheng P, et al. Cardiovascular Complications in Patients with COVID-19: Consequences of Viral Toxicities and Host Immune Response. *Curr Cardiol Rep* 2020;22(5):32. doi: 10.1007/s11886-020-01292-3 [published Online First: 2020/04/23]

- 1  
2  
3  
4  
5  
6  
7  
8  
9  
10  
11  
12  
13  
14  
15  
16  
17  
18  
19  
20  
21  
22  
23  
24  
25  
26  
27  
28  
29  
30  
31  
32  
33  
34  
35  
36  
37  
38  
39  
40  
41  
42  
43  
44  
45  
46  
47  
48  
49  
50  
51  
52  
53  
54  
55  
56  
57  
58  
59  
60
38. Feng G, Zheng KI, Yan QQ, et al. COVID-19 and Liver Dysfunction: Current Insights and Emergent Therapeutic Strategies. *J Clin Transl Hepatol* 2020;8(1):18-24. doi: 10.14218/jcth.2020.00018 [published Online First: 2020/04/11]
  39. Fanelli V, Fiorentino M, Cantaluppi V, et al. Acute kidney injury in SARS-CoV-2 infected patients. *Crit Care* 2020;24(1):155. doi: 10.1186/s13054-020-02872-z [published Online First: 2020/04/18]
  40. Mubarak M, Nasri H. COVID-19 nephropathy; an emerging condition caused by novel coronavirus infection. *J Nephrothol* 2020;9(3):e21-e21. doi: 10.34172/jnp.2020.21
  41. Castro L, Freeman BA. Reactive oxygen species in human health and disease. *Nutrition* 2001;17(2):161-65. doi: 10.1016/S0899-9007(00)00570-0
  42. Lachance PA, Nakat Z, Jeong WS. Antioxidants: An integrative approach. *Nutrition* 2001;17(10):835-38. doi: 10.1016/S0899-9007(01)00636-0
  43. Ruttkay-Nedecky B, Nejdil L, Gumulec J, et al. The role of metallothionein in oxidative stress. *Int J Mol Sci* 2013;14(3):6044-66. doi: 10.3390/ijms14036044 [published Online First: 2013/03/19]
  44. Prasad AS. Zinc: an antioxidant and anti-inflammatory agent: role of zinc in degenerative disorders of aging. *J Trace Elem Med Biol* 2014;28(4):364-71. doi: 10.1016/j.jtemb.2014.07.019 [published Online First: 2014/09/10]
  45. Matthay MA, McAuley DF, Ware LB. Clinical trials in acute respiratory distress syndrome: challenges and opportunities. *The Lancet Respiratory Medicine* 2017;5(6):524-34. doi: 10.1016/S2213-2600(17)30188-1
  46. Donahoe M. Acute respiratory distress syndrome: A clinical review. *Pulm Circ* 2011;1(2):192-211. doi: 10.4103/2045-8932.83454
  47. Frat JP, Ricard JD, Quenot JP, et al. Non-invasive ventilation versus high-flow nasal cannula oxygen therapy with apnoeic oxygenation for preoxygenation before intubation of patients with acute hypoxaemic respiratory failure: a randomised, multicentre, open-label trial. *Lancet Respir Med* 2019;7(4):303-12. doi: 10.1016/s2213-2600(19)30048-7 [published Online First: 2019/03/23]
  48. He H, Sun B, Liang L, et al. A multicenter RCT of noninvasive ventilation in pneumonia-induced early mild acute respiratory distress syndrome. *Crit Care* 2019;23(1):300. doi: 10.1186/s13054-019-2575-6 [published Online First: 2019/09/06]
  49. Pennisi MA, Bello G, Congedo MT, et al. Early nasal high-flow versus Venturi mask oxygen therapy after lung resection: a randomized trial. *Crit Care* 2019;23(1):68. doi: 10.1186/s13054-019-2361-5 [published Online First: 2019/03/02]

Table 1: Primary and secondary outcomes

| Key Primary Outcome                                                                                                                                                          | Key Secondary Outcomes                                                                                                                                                                                                                                                                                                                                                                                                                                                                                                                               |
|------------------------------------------------------------------------------------------------------------------------------------------------------------------------------|------------------------------------------------------------------------------------------------------------------------------------------------------------------------------------------------------------------------------------------------------------------------------------------------------------------------------------------------------------------------------------------------------------------------------------------------------------------------------------------------------------------------------------------------------|
| Mean change in the highest level of oxygenation (oxygen flow measured litre/min) in non-ventilated patients<br>Mean change in lowest PaO <sub>2</sub> in ventilated patients | Mortality (ICU or in-hospital)<br>Duration of mechanical ventilation<br>Duration of oxygen therapy<br>Duration of hospitalisation<br>Length of Stay in ICU                                                                                                                                                                                                                                                                                                                                                                                           |
| Other Secondary Outcomes                                                                                                                                                     |                                                                                                                                                                                                                                                                                                                                                                                                                                                                                                                                                      |
| Adverse Drug Events<br>Acute kidney injury<br>Acute liver injury<br>Duration of vasopressor drugs<br>Sequential Organ Failure Assessment (SOFA) respiratory score            | Clinical improvement based on an eight-point ordinal scale recommended in the document published by WHO R&D Blueprint "Novel Coronavirus COVID-19 Therapeutic Trial Synopsis". <ul style="list-style-type: none"> <li>• Percentage of patients reporting each severity rating on an 8-point ordinal scale [Time Frame: Day 14]</li> <li>• Time to improvement in one category from admission using the 8-point ordinal scale [ Time Frame: Up to day 28]</li> <li>• Mean change in the 8-point ordinal scale [ Time Frame: Up to day 28 ]</li> </ul> |

Table 2: inclusion and exclusion criteria

| Inclusion criteria                                                                                                                                                                                                                                                                                                                                                                                                                                                                                                                                                                                                                                                                                                                                                                                                                                                                                                                                                                                                                                        | Exclusion criteria                                                                                                                                                                                                                                                                                                                                                                                                                                                                                                                                                                                                                                                                                                                                                                                                                                                                                                                                                                                                                                                                                                                                                                                                                                                                                                                                                                                                                                                     |
|-----------------------------------------------------------------------------------------------------------------------------------------------------------------------------------------------------------------------------------------------------------------------------------------------------------------------------------------------------------------------------------------------------------------------------------------------------------------------------------------------------------------------------------------------------------------------------------------------------------------------------------------------------------------------------------------------------------------------------------------------------------------------------------------------------------------------------------------------------------------------------------------------------------------------------------------------------------------------------------------------------------------------------------------------------------|------------------------------------------------------------------------------------------------------------------------------------------------------------------------------------------------------------------------------------------------------------------------------------------------------------------------------------------------------------------------------------------------------------------------------------------------------------------------------------------------------------------------------------------------------------------------------------------------------------------------------------------------------------------------------------------------------------------------------------------------------------------------------------------------------------------------------------------------------------------------------------------------------------------------------------------------------------------------------------------------------------------------------------------------------------------------------------------------------------------------------------------------------------------------------------------------------------------------------------------------------------------------------------------------------------------------------------------------------------------------------------------------------------------------------------------------------------------------|
| <ul style="list-style-type: none"> <li>• Consenting adult patients adult male or female, age <math>\geq 18</math> years old. Laboratory-confirmed SARS-CoV-2 infection as determined by polymerase chain reaction (PCR)</li> <li>• Hospitalized with an illness of any duration with evidence of pneumonia and severe disease, critical disease, or multi-system organ dysfunction at baseline</li> <li>• Ability to provide informed consent signed by study patient or legally acceptable representative</li> <li>• Willingness and ability to comply with study-related procedures/assessments</li> <li>• Have an oxygen saturation (SaO<sub>2</sub>) of 94% or less while they were breathing ambient air or a ratio of the partial pressure of oxygen (PaO<sub>2</sub>) to the fraction of inspired oxygen (FiO<sub>2</sub>) (Pao<sub>2</sub>: Fio<sub>2</sub>) at or below 300 mg Hg.</li> <li>• No chronic kidney disease (CKD) defined by stage II or higher using the Kidney Disease Improving Global Outcomes (KDIGO) classification</li> </ul> | <ul style="list-style-type: none"> <li>• Age &lt;18 or pregnant or lactating female</li> <li>• Allergy to zinc</li> <li>• Severe hepatic impairment defined as Child C liver disease.</li> <li>• eGFR <math>\leq 60</math> mL/min/1.73 m<sup>2</sup> (defined using CKD-EPI SCr formula)</li> <li>• History of any organ transplant which requires active immunosuppressive treatment which can interfere with kidney function</li> <li>• If a patient required any of the following within seven days prior to cardiac surgery: defibrillation, mechanical ventilation, left ventricular assist device (LVAD), or other forms of mechanical circulatory support (MCS)</li> <li>• If a patient required cardiopulmonary resuscitation (CPR) within 14 days</li> <li>• DNR (do not resuscitate) DNI (do not intubate) orders</li> <li>• Death is deemed imminent or inevitable during this admission, and either the attending physician, patient or substitute decision-maker is not committed to active treatment</li> <li>• Already receiving dialysis (either acute or chronic) or imminent need of dialysis at the time of enrolment</li> <li>• Patients with known HIV infection</li> <li>• Patients with a known or suspected history of oxalate nephropathy or hyperoxaluria, scurvy, chronic iron overload, G-6PD deficiency</li> <li>• Clinician expects to prescribe Zinc for another indication</li> <li>• Patients with known haemochromatosis.</li> </ul> |

Table 3: Collected data during trial

|                                               | All patients                                                                                                                                                                                                                                                                                                                                                                                                                                                                                                                                                    |                                                                                                                                                                                                                                                                                                                                                                                                                                                                                                                                                          |
|-----------------------------------------------|-----------------------------------------------------------------------------------------------------------------------------------------------------------------------------------------------------------------------------------------------------------------------------------------------------------------------------------------------------------------------------------------------------------------------------------------------------------------------------------------------------------------------------------------------------------------|----------------------------------------------------------------------------------------------------------------------------------------------------------------------------------------------------------------------------------------------------------------------------------------------------------------------------------------------------------------------------------------------------------------------------------------------------------------------------------------------------------------------------------------------------------|
| Baseline data                                 | Baseline data <ul style="list-style-type: none"> <li>• Demographics: Age, gender, place of residence</li> <li>• Comorbidities: Diabetes mellitus, arterial hypertension, congestive heart failure, chronic obstructive airways disease, chronic liver disease, malignancy, chronic renal failure</li> <li>• Pre-admission medication</li> <li>• Functional status / frailty score</li> </ul>                                                                                                                                                                    |                                                                                                                                                                                                                                                                                                                                                                                                                                                                                                                                                          |
|                                               | Non-ventilated patients                                                                                                                                                                                                                                                                                                                                                                                                                                                                                                                                         | Ventilated patients                                                                                                                                                                                                                                                                                                                                                                                                                                                                                                                                      |
| Daily observations                            | <ul style="list-style-type: none"> <li>• Daily saturations (Worst values)</li> <li>• Daily oxygen flow</li> <li>• Fluid input</li> <li>• Urine output</li> <li>• Fluid balance</li> </ul>                                                                                                                                                                                                                                                                                                                                                                       | <ul style="list-style-type: none"> <li>• Daily PaO<sub>2</sub>/FiO<sub>2</sub> ratio</li> <li>• Daily oxygen flow</li> <li>• Fluid input</li> <li>• Urine output</li> <li>• Fluid balance</li> <li>• Vasopressor data</li> </ul>                                                                                                                                                                                                                                                                                                                         |
| Laboratory investigations (collected at 0800) | <ul style="list-style-type: none"> <li>• Daily serum creatinine</li> <li>• Daily liver function</li> <li>• Daily blood count</li> <li>• Daily zinc and trace metal concentration (copper, potassium, magnesium)</li> <li>• Daily Cardiac troponin</li> <li>• Daily lactate level</li> </ul>                                                                                                                                                                                                                                                                     | <ul style="list-style-type: none"> <li>• Daily serum creatinine</li> <li>• Daily liver function</li> <li>• Daily blood count</li> <li>• Daily zinc and trace metal concentration (copper, potassium and magnesium)</li> <li>• Daily Cardiac troponin</li> <li>• Daily lactate level</li> </ul>                                                                                                                                                                                                                                                           |
| Primary outcome measures                      | <ul style="list-style-type: none"> <li>• Mean change in highest level of oxygenation requirement (oxygen flow in litres/min)</li> </ul>                                                                                                                                                                                                                                                                                                                                                                                                                         | <ul style="list-style-type: none"> <li>• Mean change in lowest PaO<sub>2</sub>/FiO<sub>2</sub> ratio (in mmHg)</li> </ul>                                                                                                                                                                                                                                                                                                                                                                                                                                |
| Secondary outcome measures                    | <ul style="list-style-type: none"> <li>• Mortality [Time Frame: Up to day 28]</li> <li>• Duration of oxygen therapy (days)</li> <li>• Duration of hospitalization (days)</li> <li>• Length of stay in the intensive care unit and hospital</li> <li>• Frequency of Serious Adverse Drug Events</li> <li>• Acute kidney injury</li> <li>• Acute liver injury</li> <li>• Time to resolution of fever for at least 48 hours without antipyretics by clinical severity</li> <li>• Incidence of severe or life-threatening bacterial, invasive fungal, or</li> </ul> | <ul style="list-style-type: none"> <li>• Mortality [Time Frame: Up to day 28]</li> <li>• Duration of mechanical ventilation(days)</li> <li>• Duration of oxygen therapy (days)</li> <li>• Duration of hospitalization (days)</li> <li>• Length of stay in the intensive care unit and hospital</li> <li>• Frequency of Serious Adverse Drug Events</li> <li>• Acute kidney injury</li> <li>• Acute liver injury</li> <li>• Use, duration and dosage of vasopressor drugs</li> <li>• Time to resolution of fever for at least 48 hours without</li> </ul> |

1  
2  
3  
4  
5  
6  
7  
8  
9  
10  
11  
12  
13  
14  
15  
16  
17  
18  
19  
20  
21  
22  
23  
24  
25  
26  
27  
28  
29  
30  
31  
32  
33  
34  
35  
36  
37  
38  
39  
40  
41  
42  
43  
44  
45  
46

|  |                                                                                                                                                                                                                                                                                                                                                                                                                                                                                                                                                                                                                                                                                                                                                                                                                                                                                                                                             |                                                                                                                                                                                                                                                                                                                                                                                                                                                                                                                                                                                                                                                                                                                                                                                                                                                                                                                                                                                                                                                                   |
|--|---------------------------------------------------------------------------------------------------------------------------------------------------------------------------------------------------------------------------------------------------------------------------------------------------------------------------------------------------------------------------------------------------------------------------------------------------------------------------------------------------------------------------------------------------------------------------------------------------------------------------------------------------------------------------------------------------------------------------------------------------------------------------------------------------------------------------------------------------------------------------------------------------------------------------------------------|-------------------------------------------------------------------------------------------------------------------------------------------------------------------------------------------------------------------------------------------------------------------------------------------------------------------------------------------------------------------------------------------------------------------------------------------------------------------------------------------------------------------------------------------------------------------------------------------------------------------------------------------------------------------------------------------------------------------------------------------------------------------------------------------------------------------------------------------------------------------------------------------------------------------------------------------------------------------------------------------------------------------------------------------------------------------|
|  | <p>opportunistic infection</p> <ul style="list-style-type: none"> <li>• Number of patients admitted into an intensive care unit (ICU) [Time Frame: Up to day 28]</li> <li>• Sequential Organ Failure Assessment (SOFA) Respiratory Score [Time Frame: 28 days]. Assigned a point value from 0 (normal) to 4 (high degree of dysfunction/failure)</li> <li>• Clinical improvement based on an eight-point ordinal scale recommended in the document published by WHO R&amp;D Blueprint “Novel Coronavirus COVID-19 Therapeutic Trial Synopsis”.             <ul style="list-style-type: none"> <li>○ Percentage of patients reporting each severity rating on an 8-point ordinal scale [Time Frame: Day 14]</li> <li>○ Time to improvement in one category from admission using the 8-point ordinal scale [ Time Frame: Up to day 28]</li> <li>○ Mean change in the 8-point ordinal scale [ Time Frame: Up to day 28]</li> </ul> </li> </ul> | <p>antipyretics by clinical severity</p> <ul style="list-style-type: none"> <li>• Incidence of severe or life-threatening bacterial, invasive fungal, or opportunistic infection</li> <li>• Number of patients admitted into an intensive care unit (ICU) [Time Frame: Up to day 28]</li> <li>• Sequential Organ Failure Assessment (SOFA) Respiratory Score [Time Frame: 28 days]. Assigned a point value from 0 (normal) to 4 (high degree of dysfunction/failure)</li> <li>• Clinical improvement based on an eight-point ordinal scale recommended in the document published by WHO R&amp;D Blueprint “Novel Coronavirus COVID-19 Therapeutic Trial Synopsis”.             <ul style="list-style-type: none"> <li>○ Percentage of patients reporting each severity rating on an 8-point ordinal scale [Time Frame: Day 14]</li> <li>○ Time to improvement in one category from admission using the 8-point ordinal scale [ Time Frame: Up to day 28 ]</li> <li>○ Mean change in the 8-point ordinal scale [ Time Frame: Up to day 28 ]</li> </ul> </li> </ul> |
|--|---------------------------------------------------------------------------------------------------------------------------------------------------------------------------------------------------------------------------------------------------------------------------------------------------------------------------------------------------------------------------------------------------------------------------------------------------------------------------------------------------------------------------------------------------------------------------------------------------------------------------------------------------------------------------------------------------------------------------------------------------------------------------------------------------------------------------------------------------------------------------------------------------------------------------------------------|-------------------------------------------------------------------------------------------------------------------------------------------------------------------------------------------------------------------------------------------------------------------------------------------------------------------------------------------------------------------------------------------------------------------------------------------------------------------------------------------------------------------------------------------------------------------------------------------------------------------------------------------------------------------------------------------------------------------------------------------------------------------------------------------------------------------------------------------------------------------------------------------------------------------------------------------------------------------------------------------------------------------------------------------------------------------|

Peer review only

# BMJ Open

## A randomised controlled trial for high-dose intravenous zinc as adjunctive therapy in SARS-CoV-2 (COVID-19) positive critically ill patients: trial protocol

|                                 |                                                                                                                                                                                                                                                                                                                                                                                                                                                                                                                                                                                                                                                                                                               |
|---------------------------------|---------------------------------------------------------------------------------------------------------------------------------------------------------------------------------------------------------------------------------------------------------------------------------------------------------------------------------------------------------------------------------------------------------------------------------------------------------------------------------------------------------------------------------------------------------------------------------------------------------------------------------------------------------------------------------------------------------------|
| Journal:                        | <i>BMJ Open</i>                                                                                                                                                                                                                                                                                                                                                                                                                                                                                                                                                                                                                                                                                               |
| Manuscript ID                   | bmjopen-2020-040580.R2                                                                                                                                                                                                                                                                                                                                                                                                                                                                                                                                                                                                                                                                                        |
| Article Type:                   | Protocol                                                                                                                                                                                                                                                                                                                                                                                                                                                                                                                                                                                                                                                                                                      |
| Date Submitted by the Author:   | 27-Oct-2020                                                                                                                                                                                                                                                                                                                                                                                                                                                                                                                                                                                                                                                                                                   |
| Complete List of Authors:       | Perera, Marlon; Austin Health, Department of Surgery<br>El Khoury, John; Austin Health, Department of Surgery<br>Chinni, Vidyasagar; Austin Health, Department of Surgery<br>Bolton, Damien ; Austin Health, Department of Surgery<br>Qu, Liang; Austin Health, Department of Surgery<br>Johnson, Paul; Austin Health, Infectious Diseases<br>Trubiano, Jason ; Austin Health, Infectious Diseases<br>McDonald, Christine; Austin Health, Respiratory and Sleep Medicine<br>Jones, Daryl; Austin Health, Intensive Care Unit Austin Hospital<br>Bellomo, Rinaldo; Austin Health, Intensive Care<br>Patel, Oneel; Austin Health, Department of Surgery<br>Ischia, Joseph; Austin Health, Department of Surgery |
| <b>Primary Subject Heading</b>: | Infectious diseases                                                                                                                                                                                                                                                                                                                                                                                                                                                                                                                                                                                                                                                                                           |
| Secondary Subject Heading:      | Intensive care, Pharmacology and therapeutics, Public health, Infectious diseases, Global health                                                                                                                                                                                                                                                                                                                                                                                                                                                                                                                                                                                                              |
| Keywords:                       | Respiratory infections < THORACIC MEDICINE, VIROLOGY, INFECTIOUS DISEASES, PUBLIC HEALTH, Public health < INFECTIOUS DISEASES                                                                                                                                                                                                                                                                                                                                                                                                                                                                                                                                                                                 |
|                                 |                                                                                                                                                                                                                                                                                                                                                                                                                                                                                                                                                                                                                                                                                                               |

SCHOLARONE™  
Manuscripts



I, the Submitting Author has the right to grant and does grant on behalf of all authors of the Work (as defined in the below author licence), an exclusive licence and/or a non-exclusive licence for contributions from authors who are: i) UK Crown employees; ii) where BMJ has agreed a CC-BY licence shall apply, and/or iii) in accordance with the terms applicable for US Federal Government officers or employees acting as part of their official duties; on a worldwide, perpetual, irrevocable, royalty-free basis to BMJ Publishing Group Ltd ("BMJ") its licensees and where the relevant Journal is co-owned by BMJ to the co-owners of the Journal, to publish the Work in this journal and any other BMJ products and to exploit all rights, as set out in our [licence](#).

The Submitting Author accepts and understands that any supply made under these terms is made by BMJ to the Submitting Author unless you are acting as an employee on behalf of your employer or a postgraduate student of an affiliated institution which is paying any applicable article publishing charge ("APC") for Open Access articles. Where the Submitting Author wishes to make the Work available on an Open Access basis (and intends to pay the relevant APC), the terms of reuse of such Open Access shall be governed by a Creative Commons licence – details of these licences and which [Creative Commons](#) licence will apply to this Work are set out in our licence referred to above.

Other than as permitted in any relevant BMJ Author's Self Archiving Policies, I confirm this Work has not been accepted for publication elsewhere, is not being considered for publication elsewhere and does not duplicate material already published. I confirm all authors consent to publication of this Work and authorise the granting of this licence.



1  
2  
3 1 **A randomised controlled trial for high-dose intravenous zinc as adjunctive therapy in**  
4 **SARS-CoV-2 (COVID-19) positive critically ill patients: trial protocol**  
5  
6  
7 3

8 4 Marlon Perera<sup>1</sup>, John El-Khoury<sup>1</sup>, Vidyasagar Chinni<sup>1</sup>, Damien Bolton<sup>1</sup>, Liang Qu<sup>1</sup>, Paul  
9 Johnson<sup>2</sup>, Jason Trubiano<sup>2</sup>, Christine F. McDonald<sup>3,4</sup>, Daryl Jones<sup>4</sup>, Rinaldo Bellomo<sup>4</sup>, Oneel  
10 5 Patel<sup>1</sup>, Joseph Ischia<sup>1</sup>  
11  
12 6  
13 7

14 8 1. Department of Surgery, University of Melbourne, Austin Health, Victoria, 3084

15 9 2. Department of Infectious disease, Austin Health, Victoria, 3084

16 10 3. Department of Respiratory and Sleep Medicine, Austin Health, Victoria, 3084

17 11 4. Department of Medicine, University of Melbourne, Victoria 3084

18 12 5. Department of Intensive Care, University of Melbourne, Austin Health, Victoria, 3084  
19  
20  
21  
22  
23  
24

25 14 Please Address Correspondence to:

26 15 Dr Marlon Perera

27 16 Department of Surgery, Austin Health, Victoria, Australia

28 17 E: marlonlperera@gmail.com  
29  
30  
31  
32  
33  
34  
35  
36  
37  
38  
39  
40  
41  
42  
43  
44  
45  
46  
47  
48  
49  
50  
51  
52  
53  
54  
55  
56  
57  
58  
59  
60

19 Keywords: randomized controlled trial, trial protocol, zinc, COVID, respiratory medicine

21 Disclosure: Nil financial interests

22 This manuscript is original and has not been submitted to any alternate journals  
23  
24

1  
2  
3 14 2 **Abstract**5 3 Introduction

6 4 SARS-CoV-2 (COVID19) has caused an international pandemic of respiratory illness, resulting  
7 5 in significant healthcare and economic turmoil. To date, no robust vaccine or treatment has  
8 6 been identified. Elemental zinc has previously been demonstrated to have beneficial effects  
9 7 on coronaviruses and other viral respiratory infections due to its effect on RNA polymerase.  
10 8 Additionally, zinc has well demonstrated protective effects against hypoxic injury – a clear  
11 9 mechanism of end-organ injury in respiratory distress syndrome. We aimed to assess the  
12 10 effect of high dose intravenous zinc (HDIVZn) on SARS-CoV-2 infection. The end of study  
13 11 analyses will evaluate the reduction of impact of oxygen saturations or requirement of  
14 12 oxygen supplementation.

15 13  
16 14 Methods and Analysis

17 15 We designed a double-blind randomised controlled trial of daily HDIVZn (0.5mg/kg) versus  
18 16 placebo. Primary outcome measures are lowest oxygen saturation (or greatest level of  
19 17 supplemental oxygenation) for non-ventilated patients and worst PaO<sub>2</sub>/FiO<sub>2</sub> for ventilated  
20 18 patients. Following power calculations, 60 hospitalised patients and 100 ventilated patients  
21 19 will be recruited to demonstrate a 20% difference. The duration of follow-up is up to the  
22 20 point of discharge.

23 21  
24 22 Ethics and dissemination

25 23 Ethical approval was obtained through the independent Human Research Ethics Committee.  
26 24 Participant recruitment will commence in May 2020. Results will be published in peer-  
27 25 reviewed medical journals.

28 26  
29 27 Trial Registration

30 28 Clinical trial registered with Australian New Zealand Clinical Trials Registry  
31 29 (ACTRN126200000454976). No external funding was sought for the completion of this  
32 30 project.

33  
34  
35  
36  
37  
38  
39  
40  
41  
42  
43  
44  
45  
46  
47  
48  
49  
50  
51  
52  
53  
54  
55  
56  
57  
58  
59  
60

1  
2  
3 1  
4  
5 2 **Strengths and Limitations of this study**  
6 3  
7 4

- This is the first trial designed primarily to assess the effect of high dose intravenous zinc in SARS-CoV-2
  - A strength of this study is its randomised, double-blind, placebo controlled nature of the study design
  - This is an adequately powered study with objective, universal primary and secondary outcome measures
  - Potential limitations pertain to conducting the current study in Australia, a country with a relatively low prevalence of COVID19 with a risk of under recruitment
- 8  
9  
10  
11  
12  
13  
14  
15  
16  
17  
18  
19  
20  
21  
22  
23  
24  
25  
26  
27  
28  
29  
30  
31  
32  
33  
34  
35  
36  
37  
38  
39  
40  
41  
42  
43  
44  
45  
46  
47  
48  
49  
50  
51  
52  
53  
54  
55  
56  
57  
58  
59  
60

## 1 Introduction

2 Since December 2019, a new coronavirus, designated SARS-CoV-2, has caused an  
3 international pandemic of respiratory illness termed COVID19, posing significant threats to  
4 global health and the economy <sup>1-3</sup>. In more severe cases, COVID19 enters the lungs, causing  
5 respiratory complications such as bronchitis and pneumonia <sup>4,5</sup>. Development of pneumonia  
6 leads to a reduced ability for oxygenation and in some cases the development of acute  
7 respiratory distress syndrome (ARDS), requiring mechanical ventilation. In the most severe  
8 cases, patients can develop multiple organ failure and hypoxic brain injury. In the absence of  
9 an effective vaccine or robust treatment for people with the disease <sup>6</sup>, there is an urgent  
10 need to find a treatment that inhibits virus replication or reduces the progression of the  
11 disease.

12 Zinc is a naturally occurring essential heavy metal, and zinc deficiency is associated  
13 with a range of pathological conditions, including retarded growth and delayed wound  
14 healing and tissue repair. Zinc is also important for the maintenance and development of the  
15 immune system and plays a role in cell division and growth. Zinc deficiency results in  
16 reduced immunity and increases susceptibility to infectious diseases <sup>7,8</sup>. Numerous studies  
17 report the potential of zinc and zinc salts to inhibit viral infections in clinical and  
18 experimental settings. Viral infections that have been successfully inhibited by zinc include  
19 the common cold (a type of coronavirus) <sup>9</sup>, respiratory syncytial virus infections <sup>10</sup>,  
20 cytomegalovirus infections <sup>11</sup> and herpes labialis <sup>12</sup>. More importantly, zinc is a potent  
21 inhibitor of the replication of SARS-coronavirus (SARS-CoV) and equine arteritis virus (EAV)  
22 in cell culture <sup>13</sup>.

23 Furthermore, our published studies have shown that high dose intravenous zinc  
24 (HDIVZn) protects various organs, including the heart, kidneys and liver against the damage  
25 caused by hypoxia <sup>7,14-16</sup>. In addition to being efficacious, the dose of elemental zinc used for  
26 this HDIVZn trial (0.25mg/kg (0.5mg/kg ZnCl<sub>2</sub>)) and applied in our preclinical study in sheep is  
27 very safe and well-tolerated in humans as verified from multiple observational reports  
28 including the treatment of very sick children in an ICU setting with suspected zinc deficiency  
29 <sup>17-20</sup>.

30 We plan to perform a single site randomised controlled trial to test the efficacy and  
31 safety of HDIVZn administered as a daily injection in subjects with COVID19 infection to  
32 assess whether giving HDIVZn to patients improves clinical outcomes.

## 1 **Methods and Design**

2 Ethical approval was sought through the Austin Health institutional Human Research  
3 Ethics Committee (Version 2, 4<sup>th</sup> April 2020). Any modifications to the trial protocol will be  
4 approved prospectively by the associated Ethical Committee. This clinical trial was registered  
5 with Australian New Zealand Clinical Trials Registry (ACTRN126200000454976). The protocol  
6 design was produced in adherence with the Standard Protocol Items for Randomised Trials  
7 (SPIRIT) <sup>21</sup>. No external funding was sought for the completion of this project.

### 8 9 *Patient and public involvement*

10 The development of the research question stemmed from the urgent global crisis  
11 inflicted by COVID19, and the urgent need for a therapy to reduce the impact of the disease  
12 on the affected patients. Patients were not intrinsically involved in the design, recruitment  
13 or conduct of the study. Results of the study will be disseminated to patients after  
14 publication in peer-review journal. While the burden of the treatment or placebo was not  
15 assessed directly by patients, it was deemed minimal due to the lack of deviation from  
16 standard care.

### 17 18 *Study design*

19 This is a Phase 2, double-blind, placebo-controlled, randomised study at a single  
20 institution. The study plans to randomise 160 hospitalised participants, including 100  
21 critically-ill patients with confirmed COVID19 (as detailed in Table 1) and to evaluate the  
22 efficacy and safety of HDIVZn over a seven-day period of treatment.

### 23 24 *Dosing rationale*

25 The upper limit for daily zinc intake in an adult is 40mg <sup>22</sup>. However, when 30 mg of  
26 elemental zinc was given orally to humans, it resulted in an only 1.8-fold increase in plasma  
27 zinc in the first 4 hours <sup>23</sup>. A similar study in humans where elemental zinc (30 mg/d) or  
28 placebo were given orally for six months showed a statistically significant increase in the plasma zinc  
29 from  $14.18 \pm 1.75 \mu\text{mol/L}$  in the placebo group to  $17.18 \pm 3.48 \mu\text{mol/L}$  in the zinc group <sup>24</sup>.  
30 Oral delivery of zinc is affected by several factors, including normal variations in gut zinc  
31 absorption, dietary factors such as the presence of phytate, and interactions with other  
32 metal ions <sup>25</sup>. Also, repeated high oral zinc intake causes a rapid and significant upregulation  
33 of intestinal metallothioneins which markedly decrease subsequent gut zinc, and  
34 importantly copper, absorption <sup>26</sup>. The latter may lead to copper deficiency in patients

1 administered zinc for prolonged periods.

2 In our recently published sheep study, we determined that a single IV dose of ZnCl<sub>2</sub>  
3 at 0.5mg/kg increased the plasma zinc concentration by 4-fold from a baseline  
4 concentration of 11.3 ± 0.4 µmol/L to 46.5 ± 1.5 µmol/L within two hours<sup>14</sup>. Interestingly,  
5 two doses of IV ZnCl<sub>2</sub> at 0.5mg/kg increased the plasma zinc concentration 7-fold from a  
6 baseline concentration of 11.3 ± 0.4 µmol/L to 70.1 ± 5.8 µmol/L.

7 Translation of a drug's dose from animals to humans depends on the drug dose  
8 correction factor (K<sub>m</sub>) which is calculated by dividing the average body weight (kg) of a  
9 species by its body surface area (m<sup>2</sup>). For humans, K<sub>m</sub> is 37<sup>27</sup>. Direct carryover of a drug's  
10 pharmacologic dosage, from animals to humans depends on how similar the K<sub>m</sub> value of the  
11 animal species in which efficacy was tested, is to human K<sub>m</sub>. As published by Nair et al<sup>27</sup>, K<sub>m</sub>  
12 for rats is 6, for rabbits is 12 and for sheep is 36 (average body weight of sheep is 40kg, and  
13 body surface area is 1.10m<sup>2</sup><sup>28</sup>). Therefore, the near similar K<sub>m</sub> value of sheep (36) to that of  
14 humans (37) has allowed us to conclude that human equivalent elemental zinc dosage  
15 would equate to 0.25mg/kg, the same dose that was shown to be protective in the sheep  
16 study and which we plan to use in our proposed trial.

17 Information regarding the safety of HDIVZn can be derived from published reports  
18 where humans were treated with high doses of zinc<sup>17-20</sup>. The estimated elemental HDIVZn  
19 dosage for an average 70kg human to be used in our proposed study will be 0.25mg/d x  
20 70kg=17mg/d. Elemental zinc has been administered at a substantially higher dose (ranging  
21 from 26.4 to 37.5mg/d for eight successive days) in the treatment of human burns without  
22 any side effects<sup>17-19</sup>. In fact, zinc at doses ranging from 5-22mg/d has been administered in  
23 humans routinely as a component of parenteral nutrition without any reported side effects  
24<sup>29</sup>. Furthermore, a recently published phase I clinical trial in critically ill children with  
25 suspected zinc deficiency involved administration of zinc intravenously at a dose 3-times  
26 higher than is proposed in the current study (0.75mg/kg/d for seven days), without any  
27 adverse effects<sup>20</sup>.

28 The duration of daily dosing in the current trial was based on previous research  
29 assessing dose escalation of intravenous supplemental zinc<sup>20</sup>. This dose escalation study in  
30 pediatric critical illness highlighted that with sufficiently high doses of intravenous zinc, a  
31 treatment course of seven days resulted in increases of serum zinc.

32

### 33 **Participants and Randomisation**

34 *Eligibility*

35

1 Patients will be eligible for randomisation in this study if they are consenting  
2 symptomatic hospitalized adult patients fulfilling World Health Organisation's case definition  
3 for COVID-19, including a positive polymerase chain reaction (PCR) for COVID19 from any  
4 specimen (e.g. respiratory, blood, urine, stool, other bodily fluid) within 14 days of  
5 presentation. Broadly speaking, patients included will be those with respiratory associated  
6 COVID19 disease. Patients with alternate acute respiratory pathology causing respiratory  
7 compromise, such as bacterial pneumonia, will not be deemed suitable for randomisation.  
8 Inclusion and exclusion criteria are summarised in Table 1. Patients enrolled in the current  
9 trial are eligible to be recruited in alternative trials and may receive other therapeutic  
10 interventions including dexamethasone or remdesivir.

### 11 12 *Screening procedures*

13 The screening log is designed to monitor patient recruitment. A screening log will be  
14 maintained at the participating site by the research coordinator to document patients  
15 evaluated for enrolment. The log will provide a record of all patients assessed for eligibility  
16 and deemed ineligible for the study. When a patient is considered ineligible, the reason(s)  
17 will be noted on the log. The log will also be used to assess patient recruitment targets.  
18 Patients will be consented by trial investigators by completion of consent and assent forms  
19 from the patient directly or surrogates if the patient does not have the ability to consent  
20 (Supplementary 1).

### 21 22 *Randomization*

23 This study will be conducted as a randomised double-blinded placebo-controlled  
24 study using a stratified randomization method. Ward and ICU patients will be enrolled as  
25 soon as possible after fulfilling the criteria of stratification. Consenting patients will be  
26 stratified based on whether they require mechanical ventilation. Thereafter, a permuted  
27 block randomisation method with variable block sizes of 2, 4 and 6 will be used to allocate  
28 eligible patients to either the treatment group, receiving HDIVZn or to the control group in a  
29 1:1 ratio. Randomisation will be performed by the randomisation module in Research  
30 Electronic Data Capture (REDCap, Vanderbilt University, USA), which is a secure web  
31 application for managing online data collection. Patients, clinical staff, outcome assessors  
32 and data analysts will be blinded. Assessment of the unblinding procedures by the project  
33 research officer in the case of adverse event will be performed if necessary. The clinical staff  
34 involved in patient care will administer the trial drugs as soon as possible after enrolment.

1  
2  
3 1  
45 2 *Study drug administration and blinding*

6 3 Pharmaceutical grade zinc chloride stock solution obtained from an Australian  
7 4 company (Phebra Pty Ltd, Lane Cove West, NSW, Australia) will be diluted in 250ml of  
8 5 normal saline and infused, resulting in a final dosage of 0.5mg/kg/d. Patients will be  
9 6 administered zinc daily for seven days. Placebo will be unadjusted 250ml of normal saline.  
10 7 To standardise administration time, zinc infusions or control will commence in the early  
11 8 morning. Zinc or placebo will be administered via central venous or peripheral access over 3  
12 9 hours. Zinc or placebo will be administered daily until either discharge or seven days of  
13 10 infusion (depending on which is sooner). The clinical trial nurse (allocation concealment) will  
14 11 use a web-based randomisation program to determine the allocation of patients and then  
15 12 prepare the coded zinc solution or placebo. Each coded solution bag, which will be  
16 13 indistinguishable irrespective of study group, will then be dispensed for administration to  
17 14 the patient as per protocol. This coded identifying study number will also be labelled on the  
18 15 patient case report form (CRF). The investigators, study coordinators, treating physicians,  
19 16 bedside nurses and patients/family will remain blinded to the allocated study solution.

20 17  
21 18 **Study assessment**22 19 *Study objective and endpoints*

23 20 The endpoints of this study are listed in Table 2. The primary objective is to assess  
24 21 the effect of 7 days of HDIVZn on oxygenation in comparison with placebo in patients with  
25 22 confirmed COVID19. Specifically, oxygen saturations and the requirement of supplemental  
26 23 oxygenation (litres/minute) to maintain acceptable saturations will be measured at various  
27 24 timepoints in conjunction with measurement of routine observations. If applicable, the  
28 25 method of supplemental oxygenation provided will be recorded (eg. nasal prongs, Hudson  
29 26 mask). The primary outcome will be measured by either the highest level of supplemental  
30 27 oxygen (non-ventilated patients) or lowest PaO<sub>2</sub>/FiO<sub>2</sub> ratio in ventilated patients.

31 28 Secondary outcome measures include ICU and in-hospital mortality, length of stay in  
32 29 ICU or hospital, duration of supplemental oxygen, severe adverse drug events and changes  
33 30 based on WHO R&D Blueprint "Novel Coronavirus COVID19 Therapeutic Trial synopsis". The  
34 31 following is based on an eight-point ordinal scale consisting of:

35 32 0, not hospitalized, no clinical or virological evidence of infection;

36 33 1, not hospitalized, Infected, and able to resume normal activities;

37 34 2, not hospitalized, Infected, but unable to resume normal activities;



- 1 3, hospitalized, no requirement of supplemental oxygen;
- 2 4, hospitalized, requiring oxygen therapy via mask or nasal prongs;
- 3 5, hospitalized, non-invasive ventilation, requiring high flow oxygen;
- 4 6, hospitalized, intubation and mechanical ventilation
- 5 7, hospitalized, requiring ECMO, invasive mechanical ventilation, additional organ
- 6 support, RRT;
- 7 8, death;

8

#### 9 *Physical examination, measurements and laboratory tests*

10 All data will be collected by blinded trained staff using a case report form (CRF)

11 worksheet developed by the study team. Data will then be entered into the REDCap web

12 database (electronic CRF [eCRF]). Randomised patients will be followed up to discharge,

13 death or 28 days post-randomisation whichever occurs first.

14 Study day 1 commences on randomisation and concludes at the expiry of the

15 calendar day. Data collection will be restricted primarily to those variables necessary to

16 define clinical patient characteristics including baseline demographics, primary diagnoses,

17 physiological parameters, diagnostic interventions, therapeutic interventions and

18 documentation of deaths and other serious adverse events. A complete list of collected data

19 is summarised in Table 3. Compliance of study protocol will be monitored by daily checklists

20 confirming administration of trial infusion and collection of laboratory investigation and

21 minimum outcome measures.

22 Daily patient assessment will be performed to encourage participant retention,

23 completion of infusion and data collection. Further, daily assessment will allow for prompt

24 recognition of adverse effects of the trial intervention.

25

#### 26 *Adverse events*

27 An adverse reaction is defined as any untoward and unintended response to an

28 investigational medicinal product related to any dose administered. All adverse events

29 judged by either the reporting investigator or the sponsor as having a reasonable possibility

30 of a causal relationship to an investigational medicinal product will qualify as adverse

31 reactions. Adverse events were classified per the Common Terminology Criteria for Adverse

32 Events (CTCAE V5)<sup>30</sup>. All adverse events which are considered to be potentially causally

33 related to the study intervention or are otherwise of concern in the investigator's judgement

34 will be reported. An interim analysis is planned after 50% (80) of the patients have been

1  
2  
3 1 randomised. Development of severe adverse events (Grade 4), such as severe kidney or  
4 2 hepatic injury, will result in cessation of the trial for the participant and all infusions related  
5 3 to the trial will be stopped. For patients suffering adverse events, aftercare will be provided  
6 4 by in-hospital specialists units as part of ongoing care. Additionally, the treatment will be  
7 5 discontinued in cases where the participant wishes to withdraw from the trial.  
8  
9

### 10 6 11 12 13 7 *Safety evaluations*

14  
15 8 An independent Data Monitoring Committee (DMC), consisting of experts in  
16 9 intensive care, clinical research and biostatistics will be established before patient  
17 10 enrolment and will review all trial protocols. The role of the DMC will be to provide study  
18 11 oversight to ensure that the rights and safety of patients involved in the study are protected  
19 12 by reviewing reported Adverse Events and making recommendations to the Management  
20 13 Committee (MC).  
21  
22  
23  
24

### 25 14 26 27 15 **Study analysis**

#### 28 16 *Sample size*

29  
30 17 The primary outcome of this study is related to the effect of zinc therapy on the  
31 18 level of oxygenation expressed either as worst (highest) oxygen flow (in litres/min) in non-  
32 19 ventilated patients or worst (lowest) PaO<sub>2</sub> (in mmHg)/FiO<sub>2</sub> (as a fraction of 1) ratio in  
33 20 ventilated patients. We hypothesize that zinc therapy will decrease the worst level of  
34 21 oxygenation during the seven days (of the treatment period) by 20% compared to placebo  
35 22 from a mean worst value of 10L/min (placebo) to a mean of 8L/min (zinc) or for PaO<sub>2</sub>/FiO<sub>2</sub>  
36 23 ratio from a mean worst value of 150 (placebo) to a mean worst value of 180 (zinc). If  
37 24 patients transition from non-ventilated to ventilated during the study period, the PaO<sub>2</sub>/FiO<sub>2</sub>  
38 25 ratio will be used.  
39  
40  
41  
42  
43  
44

45 26 To have an 80% power to see such an effect at an alpha of 0.05 in non-ventilated  
46 27 patients, assuming a standard deviation (SD) for O<sub>2</sub> flow of 2.5L/min, 25 patients would have  
47 28 to be randomized in each arm. In ventilated patients, to have an 80% power to see such an  
48 29 effect at an alpha of 0.05, assuming an SD for the PaO<sub>2</sub>/FiO<sub>2</sub> ratio of 50, 44 patients would  
49 30 have to be randomised in each arm.  
50  
51  
52

53 31 Rounding off the first group to 30 per arm and the second group to 50 per arm to  
54 32 account for withdrawals, we estimate that a study of 160 patients would provide a suitable  
55 33 sample size to test our primary hypothesis.  
56  
57  
58  
59  
60

## 1 *Statistical evaluation*

2 De-identified data will be extracted to an Microsoft Excel 2019 (Redmond,  
3 Washington, USA) and will be made available to trial investigators, senior statisticians and  
4 the principal investigator. The descriptive analysis of the data will include the calculation of  
5 summary statistics including means, standard deviations, and absolute and relative  
6 frequencies of the baseline and follow-up data. If baseline variables are not approximately  
7 normally distributed, suitable transformations or medians with interquartile ranges will be  
8 presented. Any baseline variable differing by greater than 10% or 0.5 standard deviations  
9 between arms, will be subsequently investigated in a sensitivity analysis.

10 Any continuous variable outcomes that appear to be non-normal will be considered  
11 for transformation to improve normality of the residuals for subsequent regression analysis.  
12 Transformation will depend on: distribution of the variable, distribution of residuals, ease of  
13 interpretation, and impact on main results. The co-primary outcome analyses will compare  
14 1) the change in highest level of supplemental oxygenation in non-ventilated patients, and 2)  
15 the change in lowest PaO<sub>2</sub>/FiO<sub>2</sub> ratio in ventilated patients through the use of multivariable  
16 linear regression. Secondary outcome analyses will involve a mix of linear, logistic, and  
17 ordinal logistic regression modelling. Assumptions of the relevant models will be checked  
18 along with alternative transformations or non-parametric methods as appropriate.

19 Tests of interaction between dichotomised variables and treatment pathway will be  
20 carried out to test for differing treatment effect between participants. Sensitivity analyses  
21 will be conducted to explore the robustness of the estimate of the effect. Analyses will  
22 include: complete case analysis; per-protocol analysis, adjustment for baseline, and  
23 adjustment for imbalance at baseline (if baseline measures differ substantially).

24 A p-value 0.05 will indicate statistical significance. A full model with clinical relevant  
25 covariates (e.g. sex, age, previous heart surgery, preoperative creatinine) will be used for a  
26 stepwise backward variable selection procedure to identify independent risk factors for  
27 acute kidney injury (AKI). A senior statistician will perform data analysis on an intention-to-  
28 treat basis. An interim analysis on the safety and the primary outcomes will be performed  
29 when 50% (80/160) of the patients have received zinc or placebo for at least seven days.  
30 Summary statistics will be used to describe the clinical data and presented as mean  $\pm$  SD,  
31 median with interquartile range (IQR) or percentages as appropriate. Chi-squared analysis  
32 with Fisher's exact test (when appropriate) and Student's t-test (Mann Whitney U test for  
33 non-normal distributions) will be used to compare data between the active treatment group  
34 and the control group with statistical significance declared for probability values of 0.05 or

1 less. Analysis of the outcome of excluded patients due to other trials etc. will be in  
2 accordance with the CONSORT guidelines. Statistical coding will be made upon request.

3 Findings will be published in peer-review journals. Eligible authors will include trial  
4 investigators, principal investigator, statisticians and clinicians involved in manuscript  
5 preparation.

## 6 Discussion

7 This single centre, double-blind, randomised controlled trial will assess the role of  
8 HDIVZn in protection against the sequelae associated with SARS-CoV-2 virus. The beneficial  
9 effects of zinc on viral infections have been previously demonstrated <sup>31 32</sup>. Further, HDIVZn  
10 may provide additional protection to other end organs that may be indirectly affected by  
11 pulmonary injury and impaired oxygenation.

12 In coronaviruses, zinc inhibits both the proteolytic processing of replicase  
13 polyproteins and the RNA-dependent RNA polymerase (RdRp) activity <sup>13</sup>. Although  
14 mechanisms of action of zinc are unknown, several possibilities exist. Firstly, DNA and RNA  
15 polymerases use divalent metal ions like  $Mg^{2+}$  as a co-factor, and one possible mechanism is  
16 that zinc displaces  $Mg^{2+}$  and subsequently inhibits RdRp activity <sup>33</sup>. In support is the  
17 observation that various divalent metals ions sustained the activity of poliovirus RdRp in the  
18 following preference  $Mn^{2+} > Co^{2+} > Ni^{2+} > Fe^{2+} > Mg^{2+} > Ca^{2+} > Cu^{2+}$  <sup>34</sup>. In contrast, zinc was  
19 incapable of sustaining RdRp catalyzed nucleotide incorporation <sup>34</sup>. Secondly, a zinc-binding  
20 pocket has been identified in the Dengue virus and SARS-coronavirus RdRp <sup>13</sup>. Therefore, it is  
21 possible that binding of zinc may induce a structural change in the conformation of RdRp  
22 which disables RdRp to catalyze nucleotide incorporation. Finally, adding high  
23 concentrations of zinc ions to cells impairs viral polyprotein processing which is integral to  
24 virus replication <sup>35</sup>.

25 In addition to the direct effect on viral replication and activity, HDIVZn may play a  
26 protective role in alternate organs. Zinc has been demonstrated to be beneficial in reducing  
27 mortality in patients with severe pneumonia<sup>36</sup>. Further, in SARS-CoV-2, respiratory  
28 compromise results in impaired oxygenation and hypoxia to various end organs. Such  
29 hypoxia may contribute to end-organ failure and increase the risk of mortality. Specifically,  
30 such COVID19 associated hypoxia has been proposed to be contributory to cardiac injury <sup>37</sup>,  
31 hepatic injury <sup>38</sup> and renal injury <sup>39 40</sup>. Our published studies have shown that HDIVZn  
32 protects various organs, including the heart, kidneys and liver against the damage caused by  
33 hypoxia. It should be noted that hypoxia and oxidative stress, result in an increase in  
34

1  
2  
3 1 reactive oxygen species (ROS), including superoxide ( $O_2^-$ ), hydrogen peroxide ( $H_2O_2$ ) and  
4 hydroxyl radical ( $\cdot OH$ ) – which result in intracellular damage<sup>41 42</sup>. Zinc appears to limit ROS  
5 2 production by several mechanisms. Firstly, metallothioneins (MTs), small cysteine-rich and  
6 3 heavy metal-binding proteins, participate in the intracellular defence against reactive oxygen  
7 4 and nitrogen species<sup>43</sup> and zinc has been shown to induce MT mRNA and protein  
8 5 expression. Secondly, zinc competes with  $Fe^{2+}$  and  $Cu^{2+}$  ions for binding to cell membranes  
9 6 and proteins – normally, these active metals catalyze the production of hydroxyl radical  
10 7 from  $H_2O_2$  via Fenton chemistry. Thirdly, zinc upregulates the production and activation of  
11 8 antioxidant proteins, molecules and enzymes such as glutathione, catalase and superoxide  
12 9 dismutase (SOD), which catalyze  $O_2^-$  to oxygen or  $H_2O_2$ <sup>44</sup>. Finally, zinc reduces the activation  
13 10 of oxidant-promoting enzymes such as inducible nitric acid synthase and NADPH enzyme,  
14 11 which catalyze oxygen to  $O_2^-$ . Accordingly, we hypothesize that Zinc may provide protection  
15 12 against the hypoxic injury that critically ill patients with COVID19 may experience.  
16 13

17 14 The specific strengths of the current protocol design are a) prolonged exposure of  
18 15 HDIVZn and b) assessment of critically ill patients, a population where a benefit would be  
19 16 observed if truly present. There is an inherent difficulty in assessing pulmonary response in  
20 17 clinical trials, and accordingly, the primary outcome measure is a possible criticism.  
21 18 However, maximal oxygen requirements and  $PaO_2/FiO_2$  are well established surrogate  
22 19 markers<sup>45 46</sup>, and have been used in recent comparable trials<sup>47-49</sup>.

23 20 The safety of HDIVZn has been addressed in previous literature<sup>17-20</sup>. Elemental zinc  
24 21 has been administered at a substantially higher dose (ranging from 26.4 to 37.5mg/d for  
25 22 eight successive days) in the treatment of burns and did not produce any side effects in  
26 23 humans<sup>17-19</sup>. In the setting of critically ill patients, zinc intravenously at 3-times higher dose  
27 24 than the current study (0.75mg/kg/d for seven days) did not produce any adverse effects<sup>20</sup>.

28 25 In conclusion, we designed a single-centre, double-blind, randomised controlled trial  
29 26 to assess the potential benefit of HDIVZn for hospitalised or critically ill patients with SARS-  
30 27 CoV-2 infection and associated respiratory compromise. We believe that our well-designed  
31 28 trial will be able to expediently identify a potential agent that may improve outcomes for  
32 29 these critically ill patients.  
33 30

Contributors: MP assisted in protocol design, ethical submission and manuscript production. JEK and VC were involved in data collection and manuscript production. LQ was involved in statistical design and analysis. PJ, JT, CM were involved in patient care and study protocol design. DJ, DB, RB, OP and JI were involved in project design, patient care, manuscript production and supervision.

Competing interests: Nil

Funding: Nil

## References

1. Hu Y, Sun J, Dai Z, et al. Prevalence and severity of corona virus disease 2019 (COVID-19): A systematic review and meta-analysis. *J Clin Virol* 2020;127:104371. doi: 10.1016/j.jcv.2020.104371 [published Online First: 2020/04/22]
2. Tu H, Tu S, Gao S, et al. The epidemiological and clinical features of COVID-19 and lessons from this global infectious public health event. *J Infect* 2020 doi: 10.1016/j.jinf.2020.04.011 [published Online First: 2020/04/22]
3. Weston S, Frieman MB. COVID-19: Knowns, Unknowns, and Questions. *mSphere* 2020;5(2) doi: 10.1128/mSphere.00203-20 [published Online First: 2020/03/20]
4. Zhu J, Zhong Z, Li H, et al. CT imaging features of 4,121 patients with COVID-19: a meta-analysis. *J Med Virol* 2020 doi: 10.1002/jmv.25910 [published Online First: 2020/04/22]
5. Ledford H. How does COVID-19 kill? Uncertainty is hampering doctors' ability to choose treatments. *Nature* 2020;580(7803):311-12. doi: 10.1038/d41586-020-01056-7 [published Online First: 2020/04/11]
6. Wang Y, Zhang D, Du G, et al. Remdesivir in adults with severe COVID-19: a randomised, double-blind, placebo-controlled, multicentre trial. *The Lancet* 2020 doi: 10.1016/S0140-6736(20)31022-9
7. Ischia J, Bolton DM, Patel O. Why is it worth testing the ability of zinc to protect against ischaemia reperfusion injury for human application. *Metallomics* 2019;11(8):1330-43. doi: 10.1039/c9mt00079h
8. Prasad AS. Zinc is an Antioxidant and Anti-Inflammatory Agent: Its Role in Human Health. *Frontiers in nutrition* 2014;1:14.
9. Hulisz D. Efficacy of zinc against common cold viruses: an overview. *J Am Pharm Assoc* 2004;44(5):594-603. doi: 10.1331/1544-3191.44.5.594.hulisz [published Online First: 2004/10/22]
10. Suara RO, Crowe JE, Jr. Effect of zinc salts on respiratory syncytial virus replication. *Antimicrob Agents Chemother* 2004;48(3):783-90. doi: 10.1128/aac.48.3.783-790.2004 [published Online First: 2004/02/26]
11. Li D, Wen LZ, H Yu. [Observation on clinical efficacy of combined therapy of zinc supplement and jinye baidu granule in treating human cytomegalovirus infection]. *Zhongguo Zhong Xi Yi Jie He Za Zhi* 2005;25(5):449-51. [published Online First: 2005/06/17]



- 1  
2  
3 1 12. Femiano F, Gombos F, Scully C. Recurrent herpes labialis: a pilot study of the  
4 2 efficacy of zinc therapy. *J Oral Pathol Med* 2005;34(7):423-5. doi:  
5 3 10.1111/j.1600-0714.2005.00327.x [published Online First:  
6 4 2005/07/14]  
7 4  
8 5 13. te Velthuis AJ, van den Worm SH, Sims AC, et al. Zn(2+) inhibits coronavirus  
9 6 and arterivirus RNA polymerase activity in vitro and zinc ionophores  
10 7 block the replication of these viruses in cell culture. *PLoS Pathog*  
11 8 2010;6(11):e1001176. doi: 10.1371/journal.ppat.1001176 [published  
12 9 Online First: 2010/11/17]  
13 9  
14 10 14. O'Kane D, Gibson L, May CN, et al. Zinc preconditioning protects against renal  
15 11 ischaemia reperfusion injury in a preclinical sheep large animal model.  
16 12 *Biometals* 2018;31(5):821-34. doi: 10.1007/s10534-018-0125-3  
17 13  
18 13 15. Rao K, Sethi K, Ischia J, et al. Protective effect of zinc preconditioning against  
19 14 renal ischemia reperfusion injury is dose dependent. *PLoS ONE*  
20 15 2017;12(7):e0180028. doi: 10.1371/journal.pone.0180028  
21 16  
22 16 16. Cheung E, Nikfarjam M, Jackett L, et al. The Protective Effect of Zinc Against  
23 17 Liver Ischaemia Reperfusion Injury in a Rat Model of Global Ischaemia.  
24 18 *Journal of Clinical and Experimental Hepatology* 2019;August 20, 2019, In  
25 19 press. doi: 10.1016/j.jceh.2019.07.006  
26 20  
27 20 17. Berger MM, Baines M, Raffoul W, et al. Trace element supplementation after  
28 21 major burns modulates antioxidant status and clinical course by way of  
29 22 increased tissue trace element concentrations. *Am J Clin Nutr*  
30 23 2007;85(5):1293-300. doi: 10.1093/ajcn/85.5.1293  
31 24  
32 24 18. Berger MM, Binnert C, Chioloro RL, et al. Trace element supplementation  
33 25 after major burns increases burned skin trace element concentrations  
34 26 and modulates local protein metabolism but not whole-body substrate  
35 27 metabolism. *Am J Clin Nutr* 2007;85(5):1301-6. doi:  
36 28 10.1093/ajcn/85.5.1301  
37 29  
38 29 19. Berger MM, Spertini F, Shenkin A, et al. Trace element supplementation  
39 30 modulates pulmonary infection rates after major burns: a double-blind,  
40 31 placebo-controlled trial. *Am J Clin Nutr* 1998;68(2):365-71. doi:  
41 32 10.1093/ajcn/68.2.365  
42 33  
43 33 20. Cvijanovich NZ, King JC, Flori HR, et al. Safety and Dose Escalation Study of  
44 34 Intravenous Zinc Supplementation in Pediatric Critical Illness. *JPEN J*  
45 35 *Parenter Enteral Nutr* 2016;40(6):860-8. doi:  
46 36 10.1177/0148607115572193  
47 37  
48 37 21. Chan AW, Tetzlaff JM, Altman DG, et al. SPIRIT 2013 statement: defining  
49 38 standard protocol items for clinical trials. *Ann Intern Med*  
50 39 2013;158(3):200-7. doi: 10.7326/0003-4819-158-3-201302050-00583  
51 40 [published Online First: 2013/01/09]  
52 41  
53 41 22. Institute of Medicine Panel on M. Dietary Reference Intakes for Vitamin A,  
54 42 Vitamin K, Arsenic, Boron, Chromium, Copper, Iodine, Iron, Manganese,  
55 43 Molybdenum, Nickel, Silicon, Vanadium, and Zinc. Washington (DC):  
56 44 National Academies Press (US)  
57 45 Copyright 2001 by the National Academy of Sciences. All rights reserved. 2001.  
58 46  
59 46 23. Solomons NW, Romero-Abal ME, Weiss G, et al. Bioavailability of zinc from  
60 47 NutriSet zinc tablets compared with aqueous zinc sulfate. *Eur J Clin Nutr*  
61 48 2011;65(1):125-31. doi: 10.1038/ejcn.2010.198

- 1  
2  
3  
4  
5  
6  
7  
8  
9  
10  
11  
12  
13  
14  
15  
16  
17  
18  
19  
20  
21  
22  
23  
24  
25  
26  
27  
28  
29  
30  
31  
32  
33  
34  
35  
36  
37  
38  
39  
40  
41  
42  
43  
44  
45  
46  
47  
48  
49  
50  
51  
52  
53  
54  
55  
56  
57  
58  
59  
60
- 1 24. Feillet-Coudray C, Meunier N, Rambeau M, et al. Long-term moderate zinc  
2 supplementation increases exchangeable zinc pool masses in late-middle-  
3 aged men: the Zenith Study. *Am J Clin Nutr* 2005;82(1):103-10. doi:  
4 10.1093/ajcn.82.1.103
  - 5 25. Keyzer JJ, Oosting E, Wolthers BG, et al. Zinc absorption after oral  
6 administration of zinc sulfate. *Pharm Weekbl Sci* 1983;5(5):252-3.
  - 7 26. Hempe JM, Carlson JM, Cousins RJ. Intestinal metallothionein gene expression  
8 and zinc absorption in rats are zinc-responsive but refractory to  
9 dexamethasone and interleukin 1 alpha. *J Nutr* 1991;121(9):1389-96.
  - 10 27. Nair AB, Jacob S. A simple practice guide for dose conversion between  
11 animals and human. *J Basic Clin Pharm* 2016;7(2):27-31. doi:  
12 10.4103/0976-0105.177703
  - 13 28. Bennett JW. Regional Body Surface-Area of Sheep. *J Agric Sci*  
14 1973;81(Dec):429-32. doi: Doi 10.1017/S0021859600086469
  - 15 29. Stehle P, Stoffel-Wagner B, Kuhn KS. Parenteral trace element provision:  
16 recent clinical research and practical conclusions. *Eur J Clin Nutr*  
17 2016;70(8):886-93. doi: 10.1038/ejcn.2016.53
  - 18 30. Common Terminology Criteria for Adverse Events (CTCAE v5.0). *National*  
19 *Cancer Institute*  
20 2017:[https://ctep.cancer.gov/protocolDevelopment/electronic\\_applications/docs/CTCAE\\_v5\\_Quick\\_Reference\\_8.5x11.pdf](https://ctep.cancer.gov/protocolDevelopment/electronic_applications/docs/CTCAE_v5_Quick_Reference_8.5x11.pdf).
  - 21 31. Science M, Johnstone J, Roth DE, et al. Zinc for the treatment of the common  
22 cold: a systematic review and meta-analysis of randomized controlled  
23 trials. *CMAJ* 2012;184(10):E551-61. doi: 10.1503/cmaj.111990  
24 [published Online First: 2012/05/09]
  - 25 32. Bhatnagar S, Wadhwa N, Aneja S, et al. Zinc as adjunct treatment in infants  
26 aged between 7 and 120 days with probable serious bacterial infection: a  
27 randomised, double-blind, placebo-controlled trial. *Lancet*  
28 2012;379(9831):2072-8. doi: 10.1016/S0140-6736(12)60477-2  
29 [published Online First: 2012/06/05]
  - 30 33. Ferrari E, Wright-Minogue J, Fang JW, et al. Characterization of soluble  
31 hepatitis C virus RNA-dependent RNA polymerase expressed in  
32 Escherichia coli. *J Virol* 1999;73(2):1649-54. doi: 10.1128/jvi.73.2.1649-  
33 1654.1999 [published Online First: 1999/01/09]
  - 34 34. Arnold JJ, Ghosh SK, Cameron CE. Poliovirus RNA-dependent RNA  
35 polymerase (3D(pol)). Divalent cation modulation of primer, template,  
36 and nucleotide selection. *J Biol Chem* 1999;274(52):37060-9. doi:  
37 10.1074/jbc.274.52.37060 [published Online First: 1999/12/22]
  - 38 35. Butterworth BE, Korant BD. Characterization of the large picornaviral  
39 polypeptides produced in the presence of zinc ion. *J Virol* 1974;14(2):282-  
40 91. [published Online First: 1974/08/01]
  - 41 36. Wang L, Song Y. Efficacy of zinc given as an adjunct to the treatment of severe  
42 pneumonia: A meta-analysis of randomized, double-blind and placebo-  
43 controlled trials. *Clin Respir J* 2018;12(3):857-64. doi: 10.1111/crj.12646  
44 [published Online First: 2017/05/11]
  - 45 37. Zhu H, Rhee JW, Cheng P, et al. Cardiovascular Complications in Patients with  
46 COVID-19: Consequences of Viral Toxicities and Host Immune Response.  
47 *Curr Cardiol Rep* 2020;22(5):32. doi: 10.1007/s11886-020-01292-3  
48 [published Online First: 2020/04/23]
  - 49



- 1  
2  
3  
4  
5  
6  
7  
8  
9  
10  
11  
12  
13  
14  
15  
16  
17  
18  
19  
20  
21  
22  
23  
24  
25  
26  
27  
28  
29  
30  
31  
32  
33  
34  
35  
36  
37  
38  
39  
40  
41  
42  
43  
44  
45  
46  
47  
48  
49  
50  
51  
52  
53  
54  
55  
56  
57  
58  
59  
60
- 1 38. Feng G, Zheng KI, Yan QQ, et al. COVID-19 and Liver Dysfunction: Current  
2 Insights and Emergent Therapeutic Strategies. *J Clin Transl Hepatol*  
3 2020;8(1):18-24. doi: 10.14218/jcth.2020.00018 [published Online First:  
4 2020/04/11]
- 5 39. Fanelli V, Fiorentino M, Cantaluppi V, et al. Acute kidney injury in SARS-CoV-2  
6 infected patients. *Crit Care* 2020;24(1):155. doi: 10.1186/s13054-020-  
7 02872-z [published Online First: 2020/04/18]
- 8 40. Mubarak M, Nasri H. COVID-19 nephropathy; an emerging condition caused  
9 by novel coronavirus infection. *J Nephrothol* 2020;9(3):e21-e21. doi:  
10 10.34172/jnp.2020.21
- 11 41. Castro L, Freeman BA. Reactive oxygen species in human health and disease.  
12 *Nutrition* 2001;17(2):161-65. doi: 10.1016/S0899-9007(00)00570-0
- 13 42. Lachance PA, Nakat Z, Jeong WS. Antioxidants: An integrative approach.  
14 *Nutrition* 2001;17(10):835-38. doi: 10.1016/S0899-9007(01)00636-0
- 15 43. Ruttkay-Nedecky B, Nejdil L, Gumulec J, et al. The role of metallothionein in  
16 oxidative stress. *Int J Mol Sci* 2013;14(3):6044-66. doi:  
17 10.3390/ijms14036044 [published Online First: 2013/03/19]
- 18 44. Prasad AS. Zinc: an antioxidant and anti-inflammatory agent: role of zinc in  
19 degenerative disorders of aging. *J Trace Elem Med Biol* 2014;28(4):364-  
20 71. doi: 10.1016/j.jtemb.2014.07.019 [published Online First:  
21 2014/09/10]
- 22 45. Matthay MA, McAuley DF, Ware LB. Clinical trials in acute respiratory  
23 distress syndrome: challenges and opportunities. *The Lancet Respiratory*  
24 *Medicine* 2017;5(6):524-34. doi: 10.1016/S2213-2600(17)30188-1
- 25 46. Donahoe M. Acute respiratory distress syndrome: A clinical review. *Pulm Circ*  
26 2011;1(2):192-211. doi: 10.4103/2045-8932.83454
- 27 47. Frat JP, Ricard JD, Quenot JP, et al. Non-invasive ventilation versus high-flow  
28 nasal cannula oxygen therapy with apnoeic oxygenation for  
29 preoxygenation before intubation of patients with acute hypoxaemic  
30 respiratory failure: a randomised, multicentre, open-label trial. *Lancet*  
31 *Respir Med* 2019;7(4):303-12. doi: 10.1016/s2213-2600(19)30048-7  
32 [published Online First: 2019/03/23]
- 33 48. He H, Sun B, Liang L, et al. A multicenter RCT of noninvasive ventilation in  
34 pneumonia-induced early mild acute respiratory distress syndrome. *Crit*  
35 *Care* 2019;23(1):300. doi: 10.1186/s13054-019-2575-6 [published  
36 Online First: 2019/09/06]
- 37 49. Pennisi MA, Bello G, Congedo MT, et al. Early nasal high-flow versus Venturi  
38 mask oxygen therapy after lung resection: a randomized trial. *Crit Care*  
39 2019;23(1):68. doi: 10.1186/s13054-019-2361-5 [published Online First:  
40 2019/03/02]

1  
2  
3  
4  
5  
6  
7  
8  
9  
10  
11  
12  
13  
14  
15  
16  
17  
18  
19  
20  
21  
22  
23  
24  
25  
26  
27  
28  
29  
30  
31  
32  
33  
34  
35  
36  
37  
38  
39  
40  
41  
42  
43  
44  
45  
46

Table 1: inclusion and exclusion criteria

| Inclusion criteria                                                                                                                                                                                                                                                                                                                                                                                                                                                                                                                                                                                                                                                                                                                                                                                                                                                                                                                                                                                                                        | Exclusion criteria                                                                                                                                                                                                                                                                                                                                                                                                                                                                                                                                                                                                                                                                                                                                                                                                                                                                                                                                                                                                                                                                                                                                                                                                                                                                                                                                                                                                                                     |
|-------------------------------------------------------------------------------------------------------------------------------------------------------------------------------------------------------------------------------------------------------------------------------------------------------------------------------------------------------------------------------------------------------------------------------------------------------------------------------------------------------------------------------------------------------------------------------------------------------------------------------------------------------------------------------------------------------------------------------------------------------------------------------------------------------------------------------------------------------------------------------------------------------------------------------------------------------------------------------------------------------------------------------------------|--------------------------------------------------------------------------------------------------------------------------------------------------------------------------------------------------------------------------------------------------------------------------------------------------------------------------------------------------------------------------------------------------------------------------------------------------------------------------------------------------------------------------------------------------------------------------------------------------------------------------------------------------------------------------------------------------------------------------------------------------------------------------------------------------------------------------------------------------------------------------------------------------------------------------------------------------------------------------------------------------------------------------------------------------------------------------------------------------------------------------------------------------------------------------------------------------------------------------------------------------------------------------------------------------------------------------------------------------------------------------------------------------------------------------------------------------------|
| <ul style="list-style-type: none"> <li>• Consenting adult patients adult male or female, age ≥ 18 years old. Laboratory-confirmed SARS-CoV-2 infection as determined by polymerase chain reaction (PCR)</li> <li>• Hospitalized with an illness of any duration with evidence of pneumonia and severe disease, critical disease, or multi-system organ dysfunction at baseline</li> <li>• Ability to provide informed consent signed by study patient or legally acceptable representative</li> <li>• Willingness and ability to comply with study-related procedures/assessments</li> <li>• Have an oxygen saturation (SaO<sub>2</sub>) of 94% or less while they were breathing ambient air or a ratio of the partial pressure of oxygen (PaO<sub>2</sub>) to the fraction of inspired oxygen (FiO<sub>2</sub>) (Pao<sub>2</sub>: Fio<sub>2</sub>) at or below 300 mg Hg.</li> <li>• No chronic kidney disease (CKD) defined by stage II or higher using the Kidney Disease Improving Global Outcomes (KDIGO) classification</li> </ul> | <ul style="list-style-type: none"> <li>• Age &lt;18 or pregnant or lactating female</li> <li>• Allergy to zinc</li> <li>• Severe hepatic impairment defined as Child C liver disease.</li> <li>• eGFR ≤ 60 mL/min/1.73 m<sup>2</sup> (defined using CKD-EPI SCr formula)</li> <li>• History of any organ transplant which requires active immunosuppressive treatment which can interfere with kidney function</li> <li>• If a patient required any of the following within seven days prior to cardiac surgery: defibrillation, mechanical ventilation, left ventricular assist device (LVAD), or other forms of mechanical circulatory support (MCS)</li> <li>• If a patient required cardiopulmonary resuscitation (CPR) within 14 days</li> <li>• DNR (do not resuscitate) DNI (do not intubate) orders</li> <li>• Death is deemed imminent or inevitable during this admission, and either the attending physician, patient or substitute decision-maker is not committed to active treatment</li> <li>• Already receiving dialysis (either acute or chronic) or imminent need of dialysis at the time of enrolment</li> <li>• Patients with known HIV infection</li> <li>• Patients with a known or suspected history of oxalate nephropathy or hyperoxaluria, scurvy, chronic iron overload, G-6PD deficiency</li> <li>• Clinician expects to prescribe Zinc for another indication</li> <li>• Patients with known haemochromatosis.</li> </ul> |

Table 2: Primary and secondary outcomes

| Key Primary Outcome                                                                                                                                                          | Key Secondary Outcomes                                                                                                                                                                                                                                                                                                                                                                                                                                                                                                                               |
|------------------------------------------------------------------------------------------------------------------------------------------------------------------------------|------------------------------------------------------------------------------------------------------------------------------------------------------------------------------------------------------------------------------------------------------------------------------------------------------------------------------------------------------------------------------------------------------------------------------------------------------------------------------------------------------------------------------------------------------|
| Mean change in the highest level of oxygenation (oxygen flow measured litre/min) in non-ventilated patients<br>Mean change in lowest PaO <sub>2</sub> in ventilated patients | Mortality (ICU or in-hospital)<br>Duration of mechanical ventilation<br>Duration of oxygen therapy<br>Duration of hospitalisation<br>Length of Stay in ICU                                                                                                                                                                                                                                                                                                                                                                                           |
| Other Secondary Outcomes                                                                                                                                                     |                                                                                                                                                                                                                                                                                                                                                                                                                                                                                                                                                      |
| Adverse Drug Events<br>Acute kidney injury<br>Acute liver injury<br>Duration of vasopressor drugs<br>Sequential Organ Failure Assessment (SOFA) respiratory score            | Clinical improvement based on an eight-point ordinal scale recommended in the document published by WHO R&D Blueprint "Novel Coronavirus COVID-19 Therapeutic Trial Synopsis". <ul style="list-style-type: none"> <li>• Percentage of patients reporting each severity rating on an 8-point ordinal scale [Time Frame: Day 14]</li> <li>• Time to improvement in one category from admission using the 8-point ordinal scale [ Time Frame: Up to day 28]</li> <li>• Mean change in the 8-point ordinal scale [ Time Frame: Up to day 28 ]</li> </ul> |

Table 3: Collected data during trial

|                                               | All patients                                                                                                                                                                                                                                                                                                                                                                                                                                                                                                                                                    |                                                                                                                                                                                                                                                                                                                                                                                                                                                                                                                                                          |
|-----------------------------------------------|-----------------------------------------------------------------------------------------------------------------------------------------------------------------------------------------------------------------------------------------------------------------------------------------------------------------------------------------------------------------------------------------------------------------------------------------------------------------------------------------------------------------------------------------------------------------|----------------------------------------------------------------------------------------------------------------------------------------------------------------------------------------------------------------------------------------------------------------------------------------------------------------------------------------------------------------------------------------------------------------------------------------------------------------------------------------------------------------------------------------------------------|
| Baseline data                                 | Baseline data <ul style="list-style-type: none"> <li>• Demographics: Age, gender, place of residence</li> <li>• Comorbidities: Diabetes mellitus, arterial hypertension, congestive heart failure, chronic obstructive airways disease, chronic liver disease, malignancy, chronic renal failure</li> <li>• Pre-admission medication</li> <li>• Functional status / frailty score</li> </ul>                                                                                                                                                                    |                                                                                                                                                                                                                                                                                                                                                                                                                                                                                                                                                          |
|                                               | Non-ventilated patients                                                                                                                                                                                                                                                                                                                                                                                                                                                                                                                                         | Ventilated patients                                                                                                                                                                                                                                                                                                                                                                                                                                                                                                                                      |
| Daily observations                            | <ul style="list-style-type: none"> <li>• Daily saturations (Worst values)</li> <li>• Daily oxygen flow</li> <li>• Fluid input</li> <li>• Urine output</li> <li>• Fluid balance</li> </ul>                                                                                                                                                                                                                                                                                                                                                                       | <ul style="list-style-type: none"> <li>• Daily PaO<sub>2</sub>/FiO<sub>2</sub> ratio</li> <li>• Daily oxygen flow</li> <li>• Fluid input</li> <li>• Urine output</li> <li>• Fluid balance</li> <li>• Vasopressor data</li> </ul>                                                                                                                                                                                                                                                                                                                         |
| Laboratory investigations (collected at 0800) | <ul style="list-style-type: none"> <li>• Daily serum creatinine</li> <li>• Daily liver function</li> <li>• Daily blood count</li> <li>• Daily zinc and trace metal concentration (copper, potassium, magnesium)</li> <li>• Daily Cardiac troponin</li> <li>• Daily lactate level</li> </ul>                                                                                                                                                                                                                                                                     | <ul style="list-style-type: none"> <li>• Daily serum creatinine</li> <li>• Daily liver function</li> <li>• Daily blood count</li> <li>• Daily zinc and trace metal concentration (copper, potassium and magnesium)</li> <li>• Daily Cardiac troponin</li> <li>• Daily lactate level</li> </ul>                                                                                                                                                                                                                                                           |
| Primary outcome measures                      | <ul style="list-style-type: none"> <li>• Mean change in highest level of oxygenation requirement (oxygen flow in litres/min)</li> </ul>                                                                                                                                                                                                                                                                                                                                                                                                                         | <ul style="list-style-type: none"> <li>• Mean change in lowest PaO<sub>2</sub>/FiO<sub>2</sub> ratio (in mmHg)</li> </ul>                                                                                                                                                                                                                                                                                                                                                                                                                                |
| Secondary outcome measures                    | <ul style="list-style-type: none"> <li>• Mortality [Time Frame: Up to day 28]</li> <li>• Duration of oxygen therapy (days)</li> <li>• Duration of hospitalization (days)</li> <li>• Length of stay in the intensive care unit and hospital</li> <li>• Frequency of Serious Adverse Drug Events</li> <li>• Acute kidney injury</li> <li>• Acute liver injury</li> <li>• Time to resolution of fever for at least 48 hours without antipyretics by clinical severity</li> <li>• Incidence of severe or life-threatening bacterial, invasive fungal, or</li> </ul> | <ul style="list-style-type: none"> <li>• Mortality [Time Frame: Up to day 28]</li> <li>• Duration of mechanical ventilation(days)</li> <li>• Duration of oxygen therapy (days)</li> <li>• Duration of hospitalization (days)</li> <li>• Length of stay in the intensive care unit and hospital</li> <li>• Frequency of Serious Adverse Drug Events</li> <li>• Acute kidney injury</li> <li>• Acute liver injury</li> <li>• Use, duration and dosage of vasopressor drugs</li> <li>• Time to resolution of fever for at least 48 hours without</li> </ul> |

|  |                                                                                                                                                                                                                                                                                                                                                                                                                                                                                                                                                                                                                                                                                                                                                                                                                                                                                                                                 |                                                                                                                                                                                                                                                                                                                                                                                                                                                                                                                                                                                                                                                                                                                                                                                                                                                                                                                                                                                                                                                       |
|--|---------------------------------------------------------------------------------------------------------------------------------------------------------------------------------------------------------------------------------------------------------------------------------------------------------------------------------------------------------------------------------------------------------------------------------------------------------------------------------------------------------------------------------------------------------------------------------------------------------------------------------------------------------------------------------------------------------------------------------------------------------------------------------------------------------------------------------------------------------------------------------------------------------------------------------|-------------------------------------------------------------------------------------------------------------------------------------------------------------------------------------------------------------------------------------------------------------------------------------------------------------------------------------------------------------------------------------------------------------------------------------------------------------------------------------------------------------------------------------------------------------------------------------------------------------------------------------------------------------------------------------------------------------------------------------------------------------------------------------------------------------------------------------------------------------------------------------------------------------------------------------------------------------------------------------------------------------------------------------------------------|
|  | <p>opportunistic infection</p> <ul style="list-style-type: none"> <li>• Number of patients admitted into an intensive care unit (ICU) [Time Frame: Up to day 28]</li> <li>• Sequential Organ Failure Assessment (SOFA) Respiratory Score [Time Frame: 28 days]. Assigned a point value from 0 (normal) to 4 (high degree of dysfunction/failure)</li> <li>• Clinical improvement based on an eight-point ordinal scale recommended in the document published by WHO R&amp;D Blueprint “Novel Coronavirus COVID-19 Therapeutic Trial Synopsis”. <ul style="list-style-type: none"> <li>○ Percentage of patients reporting each severity rating on an 8-point ordinal scale [Time Frame: Day 14]</li> <li>○ Time to improvement in one category from admission using the 8-point ordinal scale [ Time Frame: Up to day 28]</li> <li>○ Mean change in the 8-point ordinal scale [ Time Frame: Up to day 28]</li> </ul> </li> </ul> | <p>antipyretics by clinical severity</p> <ul style="list-style-type: none"> <li>• Incidence of severe or life-threatening bacterial, invasive fungal, or opportunistic infection</li> <li>• Number of patients admitted into an intensive care unit (ICU) [Time Frame: Up to day 28]</li> <li>• Sequential Organ Failure Assessment (SOFA) Respiratory Score [Time Frame: 28 days]. Assigned a point value from 0 (normal) to 4 (high degree of dysfunction/failure)</li> <li>• Clinical improvement based on an eight-point ordinal scale recommended in the document published by WHO R&amp;D Blueprint “Novel Coronavirus COVID-19 Therapeutic Trial Synopsis”. <ul style="list-style-type: none"> <li>○ Percentage of patients reporting each severity rating on an 8-point ordinal scale [Time Frame: Day 14]</li> <li>○ Time to improvement in one category from admission using the 8-point ordinal scale [ Time Frame: Up to day 28 ]</li> <li>○ Mean change in the 8-point ordinal scale [ Time Frame: Up to day 28 ]</li> </ul> </li> </ul> |
|--|---------------------------------------------------------------------------------------------------------------------------------------------------------------------------------------------------------------------------------------------------------------------------------------------------------------------------------------------------------------------------------------------------------------------------------------------------------------------------------------------------------------------------------------------------------------------------------------------------------------------------------------------------------------------------------------------------------------------------------------------------------------------------------------------------------------------------------------------------------------------------------------------------------------------------------|-------------------------------------------------------------------------------------------------------------------------------------------------------------------------------------------------------------------------------------------------------------------------------------------------------------------------------------------------------------------------------------------------------------------------------------------------------------------------------------------------------------------------------------------------------------------------------------------------------------------------------------------------------------------------------------------------------------------------------------------------------------------------------------------------------------------------------------------------------------------------------------------------------------------------------------------------------------------------------------------------------------------------------------------------------|

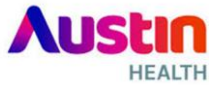

Place Patient Label Here

## Participant Information Sheet/Consent Form (Enrol)

Interventional Study - Adult providing own consent to enrol

|                                     |                                                                                                                                                   |
|-------------------------------------|---------------------------------------------------------------------------------------------------------------------------------------------------|
| <b>Title</b>                        | <b>High-dose Zinc as Adjunctive therapy in COVID positive Critically Ill Patients: A Pilot Randomized Controlled Trial</b>                        |
| <b>Short Title</b>                  | <b>ZINC COVID</b>                                                                                                                                 |
| <b>Protocol Number</b>              | Version 3, 4 <sup>th</sup> April 2020                                                                                                             |
| <b>Local Principal Investigator</b> | Associate Professor Joseph Ischia                                                                                                                 |
| <b>Associate Investigator(s)</b>    | Dr Oneel Patel, Professor Rinaldo Bellomo, Dr Daryl Jones, Professor Damien Bolton, Dr Glenn Eastwood, Prof Paul Johnson, Prof Christine McDonald |
| <b>Location</b>                     | Austin Hospital                                                                                                                                   |

### Part 1 What does my participation involve?

#### 1 Introduction

You are invited to take part in this research project because you have been admitted to the Austin hospital with severe coronavirus infection. During your hospital stay, you may be at high risk of developing difficulty with your breathing and getting enough oxygen. Soon, you may need a machine to help you breath (mechanical ventilation). Currently, there are no standard drugs for preventing the respiratory failure associated with COVID-19 infection. It is possible that zinc may be useful in reducing the severity of the coronavirus infection. However, we really do not know if it is beneficial or not and therefore we are performing this trial.

This Participant Information and Consent Form tells you about the research project. It explains the tests and treatments involved. Knowing what is involved will help you decide if you want to take part in the research.

Please read this information carefully. Ask questions about anything that you don't understand or want to know more about. Before deciding whether or not to take part, you might want to talk about it with a relative, friend or your local doctor.

Participation in this research is voluntary. If you don't wish to take part, you don't have to. You will receive the best possible care whether or not you take part. You are also eligible for new treatments that may arise or other studies that may be suitable for you during your stay.

If you decide you want to take part in the research project, you will be asked to sign this consent form. By signing the consent section, you are telling us that you:

- Understand what you have read
- Consent to take part in the research project

- Consent to have the tests and treatments that are described
- Consent to the use of your personal and health information as described

You will be given a copy of this Participant Information and Consent Form to keep.

## 2 What is the purpose of this research?

A pandemic of a novel coronavirus (COVID-19 or 2019-CoV) infection has posed significant threats to international health and the economy. In the absence of any vaccine for this virus, there is an urgent need to find a treatment that can stop the growth of the virus in the body and the complications it can cause.

In more severe cases, coronavirus enters the lungs. As the virus multiplies, it can cause problems with your breathing like bronchitis and pneumonia. Development of pneumonia leads to a reduced ability of the lungs to absorb oxygen. In a small number of severe cases, COVID-19 infections lead to the development of respiratory failure and acute respiratory distress syndrome (ARDS). Respiratory failure and ARDS are medical terms that define a condition where one can find it increasingly difficult to breathe. In such cases, the patient requires a ventilator which helps them to breathe and maintains oxygen levels in the blood. However, if lungs are damaged beyond a certain level and not enough oxygen is provided to the rest of the body, respiratory failure could lead to failure of other major organs, including the liver, kidney and brain.

Zinc is an essential nutrient which performs various vital functions in the body. Zinc is essential for the maintenance and development of the immune system, which helps fight infections. Zinc is required for wound healing and tissue repair. Zinc protects organs against injury instigated by reduced oxygen supply. Zinc has also been shown to protect against pneumonia.

Numerous research studies have shown the potential of zinc to prevent the growth of a number of other viruses (such as those that cause the common cold) that are similar to coronavirus that causes the COVID-19 illness. Furthermore, intravenous zinc has been shown to protect various organs, including the heart, kidneys and liver against the damage caused by the reduced availability of oxygen.

The amount of zinc that we plan to give is thought to be very safe with minimal side effects. This is based on earlier studies where humans with severe burns were injected with nearly double the amount of zinc that we plan to give, and it did not produce any side effects. Furthermore, in a recent study critically ill children were given a 3-times higher amount of zinc compared to what we plan to give in the current study. Again, it did not produce any adverse effects. Based on these human studies, we are confident that the dose of zinc that we plan to use in this study is very safe and well-tolerated.

In summary, we really do not know if zinc is beneficial in people infected with the coronavirus. Therefore, the goal of this study is to test if zinc given as a daily intravenous injection through your drip in participants with coronavirus infection can reduce the severity of the disease and improve patient outcomes. A positive result of our proposed study will have an enormous impact on the health outcomes of patients who have developed coronavirus infections for which there are currently no treatments.

This research has been initiated by the study doctor, Associate Professor Joseph Ischia.

## 3 What does participation in this research involve?



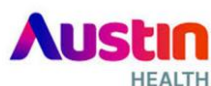

Place Patient Label Here

If you agree to participate in this study, you will be asked to sign the Participant Consent Form.

This study will be conducted over the time you are admitted to the Austin Hospital in the ward or in the intensive care unit.

#### In the ward or in the intensive care unit

You are participating in a randomized controlled research project. Sometimes we do not know which treatment is best for treating a condition. To find out, we need to compare different treatments. We put people into groups and give each group a different treatment. The results are compared to see if one is better. To try and make sure the groups are the same; each participant is put into a group by chance (random).

While you are admitted to the Austin hospital, you will be randomly assigned (like tossing a coin) to receive intravenous zinc or placebo. **A placebo is a medication with no active ingredients. It looks like the real thing but is not.** This means that you will have an equal (50/50) chance of receiving either zinc or placebo. Neither the doctor nor you can decide which treatment you receive.

This trial is a 'double-blind trial'. This means that following randomization, your treating doctors and other staff caring for you in the hospital and intensive care unit will not know which intravenous medicine is being given. The zinc chloride is a colourless fluid in the 250ml saline bag. Therefore, it will be impossible to tell which treatment you are receiving.

After you have been enrolled and randomized, the treating doctor will prescribe the amount (dose and frequency) of the study treatment, as they usually do for either of the study medicines: zinc chloride 0.5 mg/kg or Placebo (normal saline) administered daily around 9 am, but it is safe to give the treatment starting anywhere between 8 am to 12 pm. You will receive the zinc chloride through an exclusive lumen of the central venous catheter or peripheral catheter inserted in your vein, which is part of the standard of care. You will receive the treatment (with zinc or placebo) for 7 days, and then the treatments will stop. The treatment will be given in a 250ml bag of saline solution which will contain zinc chloride or placebo (i.e. not have zinc in it). The saline bag will be given over about a 3-6 hour period depending on what your treating doctors think is best for you.

Apart from this once daily drip, you will receive the usual medical and nursing care by the ward team or intensive care unit team. This study does involve the collection of blood samples (approximately 5-15 ml, size of a tablespoon each time). These will be collected daily as per your usual care. Some of this blood will be sent to Prof Jose Villadangos at the University of Melbourne, Parkville, Melbourne for analysis of inflammatory markers. After analysis, these samples will be destroyed as per normal Melbourne University blood product disposal protocols.

Your general hospital care will not be affected in any way by the study.

There will be no formal follow-up, but we will collect data on how you recover from the infection for the time you are in the hospital recovering for up to 28 days. We request access to your medical record to collect research related data such as blood pressure, heart rate changes and the dates you are discharged from the intensive care unit and from the hospital.

There are no additional costs associated with participating in this research project, nor will you be paid. All medication, tests and medical care required as part of the research project will be provided to you free of charge.



#### 4 What do I have to do?

Your involvement in this study will not have any effect on the standard of care you receive. There will be no restriction on your daily activities, or will there be any dietary restrictions. You can take your regular medication; however, we will take a note of the name of the medicine and the amount you take.

#### 5 Other relevant information about the research project

This study will involve only those participants who are admitted to Austin Hospital. For this study, we will seek the participation of 160 people. Eighty will be randomly assigned (like tossing a coin) to receive intravenous zinc, and another 80 will receive a placebo. This project involves researchers from Austin Hospital, University of Melbourne and Monash University.

#### 6 Do I have to take part in this research project?

Participation in any research project is voluntary. If you do not wish to take part, you do not have to. If you decide to take part and later change your mind, you are free to withdraw from the project at any stage.

If you do decide to take part, you will be given this participant Information and Consent Form to sign, and you will be given a copy to keep.

Your decision whether to take part or not to take part, or to take part and then withdraw, will not affect your routine treatment, your relationship with those treating you or your relationship with the Austin Hospital.

#### 7 What are the alternatives to participation?

If you decide not to participate in this study, you will continue to receive standard care, and your treatment will be unaffected by your decision not to participate.

#### 8 What are the possible benefits of taking part?

We cannot guarantee or promise that you will receive any benefits from this research. This study aims to further medical knowledge and improve the understanding of whether zinc is beneficial in critically ill patients suffering from COVID-19 infection.

#### 9 What are the possible risks and disadvantages of taking part?

Medical treatments often cause side effects. You may have none, some or all of the effects listed below, and they may be mild, moderate or severe. If you have any of these side effects or are worried about them, talk with your study doctor. Your study doctors will also be looking out for the side effects.

Choosing to take part in this study should not pose any additional risk to you above the risks associated with your usual treatment in the hospital. Zinc is an accepted treatment for nutritional deficiency states. Although this medicine has been given to many patients over many years and is in regular current use, there may be additional unforeseen or unknown risks.

Uncommon side effects include:

1  
2  
3  
4  
5  
6  
7  
8  
9  
10  
11  
12  
13  
14  
15  
16  
17  
18  
19  
20  
21  
22  
23  
24  
25  
26  
27  
28  
29  
30  
31  
32  
33  
34  
35  
36  
37  
38  
39  
40  
41  
42  
43  
44  
45  
46  
47  
48  
49  
50  
51  
52  
53  
54  
55  
56  
57  
58  
59  
60

FRH018170



Place Patient Label Here

- Mild and short-lasting - Nausea and vomiting, stomach pain and diarrhoea, flu-like symptoms: fever, chills, cough, headache, a decrease in the good cholesterol (HDL) levels in your blood which is thought to be the protective cholesterol against heart disease, changes in taste perceptions (metallic taste), copper deficiency, mental confusion (**less than 5%**)
- Severe and possibly permanent- acute kidney injury and possible chronic kidney disease or need for dialysis or renal transplant (**unknown or thought to be very low- less than 1%**)

As you will be in the hospital when the study medication is given, you will be closely monitored and treated immediately if any effects were to occur.

If at any point during the study, your study doctor feels it is in your best interests not to continue receiving the study medicine; or if during the study, there is evidence to suggest beyond a reasonable doubt that the study medicine is not beneficial then your involvement in the study may be stopped.

#### 10 What will happen to my test samples?

Some of the blood samples that you provide will be transferred to Austin Pathology for routine analysis for your standard care. Some of the blood will be sent for analysis at a laboratory that measures the levels of zinc and other metals to see if treating with zinc causes major changes in these metals. After these tests, any remaining blood samples will be destroyed.

#### 11 What if new information arises during this research project?

Sometimes during the course of a research project, new information becomes available about the treatment that is being studied. If this happens, your study doctor will tell you about it and discuss with you whether you want to continue in the research project. If during the course of the study, a superior treatment becomes available for COVID-19, you have the right to withdraw from the study. If you decide to withdraw, your study doctor will make arrangements for your regular health care to continue. If you choose to continue in the research project, you will be asked to sign an updated consent form.

Also, on receiving new information, your study doctor might consider it to be in your best interests to withdraw you from the research project. If this happens, he/she will explain the reasons and arrange for your regular health care to continue.

#### 12 Can I have other treatments during this research project?

Whilst you are participating in this research project, you are able to take all of the medications or treatments you have been taking for your condition or for other reasons. It is important to tell your study doctor and the study staff about any treatments or medications you may be taking, including over-the-counter medications, vitamins or herbal remedies, acupuncture or other alternative treatments. You should also tell your study doctor about any changes to these during your participation in the research project.

#### 13 What if I withdraw from this research project?

If you decide to withdraw from the project, please notify a member of the research team before you withdraw. This notice will allow that person or the research supervisor to discuss any health risks or special requirements linked to withdrawing.

If you do withdraw your consent during the research project, the study doctor and relevant study staff will not collect additional personal information from you, although personal information already collected will be retained to ensure that the results of the research project can be measured properly and to comply with the law. You should be aware that data collected by the sponsor up to the time you withdraw will form part of the research project results. If you do not want them to do this, you must tell them before you join the research project.

#### 14 Could this research project be stopped unexpectedly?

This research project may be stopped unexpectedly for a variety of reasons. These may include reasons such as:

- Unacceptable side effects
- The treatment is shown not to be effective
- The treatment is shown to work or not need further testing
- Decisions made by local regulatory/health authorities.
- A superior treatment for COVID-19 is discovered.

#### 15 What happens when the research project ends?

After recruiting the planned 160 participants and following up for 28 days, the study will be closed, and the analysis of results will begin. The results will be reviewed by the study team and a statistician to determine if zinc chloride improves outcomes in patients with COVID-19 infection. We will then publish these results in research papers for the medical and global community. No follow-up is required of the study participants.

Zinc chloride is intended as a treatment for COVID-19. Therefore, once the participants have recovered or discharged from the hospital there is no need to take Zinc chloride, and it will not be available to participants.

You are welcome to receive information about the results of the study after they have been analysed and made public. Please provide a written request to the clinical contact person (Assoc Prof Joseph Ischia) noted at the end of this consent and a copy of the research results papers will be provided to you free of charge.

## Part 2 How is the research project being conducted?

#### 16 What will happen to information about me?

By signing the consent form, you consent to the study doctor and relevant research staff collecting and using personal information about you for the research project. Any information obtained in connection with this research project that can identify you will remain confidential. Data will remain confidentially stored in research offices at the Austin Hospital. The offices will be securely locked and only accessible by the research team. Electronic data will be kept securely on a password-protected database. Only

1  
2  
3  
4  
5  
6  
7  
8  
9  
10  
11  
12  
13  
14  
15  
16  
17  
18  
19  
20  
21  
22  
23  
24  
25  
26  
27  
28  
29  
30  
31  
32  
33  
34  
35  
36  
37  
38  
39  
40  
41  
42  
43  
44  
45  
46  
47  
48  
49  
50  
51  
52  
53  
54  
55  
56  
57  
58  
59  
60

FRH018170



Place Patient Label Here

1  
2  
3  
4  
5  
6  
7  
8  
9  
10  
11  
12  
13  
14  
15  
16  
17  
18  
19  
20  
21  
22  
23  
24  
25  
26  
27  
28  
29  
30  
31  
32  
33  
34  
35  
36  
37  
38  
39  
40  
41  
42  
43  
44  
45  
46  
47  
48  
49  
50  
51  
52  
53  
54  
55  
56  
57  
58  
59  
60

the ZINC COVID study team at the Austin Hospital will have the list that can link your identity to the study code. Your information will only be used for the purpose of this research project, and it will only be disclosed with your permission, except as required by law. Data collected for this study will be stored for 15 years. After this time, electronic data will be destroyed by confidential erasing and paper records will be destroyed confidential shredding.

Information about you may be obtained from your health records held at this and other health services for the purpose of this research. By signing the consent form, you agree to the study team accessing health records if they are relevant to your participation in this research project.

It is anticipated that the results of this research will be published and presented in a variety of forums. In any publication and/or presentation, the information will be provided in such a way that you cannot be identified, except with your permission. Identifiable information will not be made public in any form so that confidentiality is maintained. The study database will contain information from all study participants, but not anything that can identify you as an individual. This information may be made available to other researchers. If this happens, your identity will be protected, and you will not be identified or contacted by other researchers who request access to the study database.

Information about participation in this research may be recorded in your health records. In accordance with relevant Australian state and federal privacy laws, you have the right to request access to your information collected and stored by the research team. You also have the right to request that any information with which you disagree be corrected. Please contact the study team member named at the end of this document if you would like to access your information.

## 17 Complaints and compensation

If you suffer any injuries or complications as a result of this research project, you should contact the study team as soon as possible, and you will be assisted with arranging appropriate medical treatment. If you are eligible for Medicare, you can receive any medical treatment required to treat the injury or complication, free of charge, as a public patient in any Australian public hospital.

In the event of loss or injury, the parties involved in this research project have agreed to a compensation agreement. Compensation may be available if your injury or complication is caused by the study medicines or by the negligence of any of the parties involved in the study. If you receive compensation that includes an amount for medical expenses, you will be required to pay for your medical treatment from those compensation monies.

## 18 Who is organizing and funding the research?

The Principal Investigator for this study is Associate Professor Joseph Ischia. This research has received funding from the Australian Urologic Cancer Research Trust. All monies will be administered through Austin Health and are directed to run the study at the Austin Hospital. This money pays the Austin Hospital for the work done by its staff in this study. No money is paid directly to individual researchers.

## 19 Who has reviewed the research project?

All research in Australia involving humans is reviewed by an independent group of people called a Human Research Ethics Committee (HREC). The ethical aspects of this research project have been approved by the Austin Health Human Research Ethics Committee.

This project will be carried out according to the *National Statement on Ethical Conduct in Human Research (2007)*. This statement has been developed to protect the interests of people who agree to participate in human research studies.

## 20 Further information and who to contact

The person you may need to contact will depend on the nature of your query.

If you want any further information concerning this study or if you have any medical problems which may be related to your involvement in the study (for example, any side effects), you can contact the following people:

### Clinical contact person

|           |                          |
|-----------|--------------------------|
| Name      | Assoc Prof Joseph Ischia |
| Position  | Principal Investigator   |
| Telephone | (03) 9496 3676           |

For matters relating to research at the site at which you are participating, the details of the local site complaints person are:

### Complaints contact person

|           |                                  |
|-----------|----------------------------------|
| Position  | Complaints Officer               |
| Telephone | (03) 9496 4035 or (03) 9496 4090 |
| Email     | ethics@austin.org.au             |

If you have any complaints about any aspect of the project, the way it is being conducted or any questions about being a research participant in general, then you may contact:

### Reviewing HREC approving this research and HREC Executive Officer details

|                        |                                               |
|------------------------|-----------------------------------------------|
| Reviewing HREC name    | Austin Health Human Research Ethics Committee |
| HREC Executive Officer | Mrs Lisa Pedro                                |
| Telephone              | (03) 9496 4035                                |
| Email                  | ethics@austin.org.au                          |

## Consent Form - Adult providing own consent to enrol

Title

**High-dose Zinc as Adjunctive therapy in COVID positive Critically Ill Patients: A Pilot Randomized Controlled Trial**

Short Title

**ZINC COVID**

Protocol Number

Version 2, 1<sup>st</sup> April 2020

Local Principal Investigator

Associate Professor Joseph Ischia

Associate Investigator(s)

Dr Oneel Patel, Professor Rinaldo Bellomo, Dr Daryl Jones, Professor Damien Bolton, Dr Glenn Eastwood, Prof Paul Johnson, Prof Christine McDonald

Location

Austin Hospital

### Declaration by Participant

- I have read the Participant Information Sheet or someone has read it to me in a language that I understand.
- I understand the purposes, procedures and risks of the research described in the project.
- I give permission for my doctors, other health professionals, hospitals or laboratories outside this hospital to release information to Austin Health concerning my condition and treatment for the purposes of this project. I understand that such information will remain confidential.
- I have had an opportunity to ask questions and I am satisfied with the answers I have received.
- I freely agree to participate in this research project as described and understand that I am free to withdraw at any time during the study without affecting my future health care.
- I understand that I will be given a signed copy of this document to keep.

Name of Participant (please print)

Signature

Date

### Declaration by Study Doctor/Senior Researcher<sup>†</sup>

I have given a verbal explanation of the research project, its procedures and risks and I believe that the participant has understood that explanation.

Name of Study Doctor/Senior Researcher<sup>†</sup> (please print)

Signature

Date

<sup>†</sup> A senior member of the research team must provide the explanation of, and information concerning, the research project. Note: All parties signing the consent section must date their own signature. I understand that, if I decide to discontinue the study treatment, a member of the research team may request my permission to obtain access to my medical records for collection of follow-up information for the purposes of research and analysis.

## Form for Withdrawal of Participation - *Adult providing own consent to enrol*

**Title** High-dose Zinc as Adjunctive therapy in COVID positive Critically Ill Patients: A Pilot Randomized Controlled Trial

**Short Title** ZINC COVID

**Protocol Number** Version 2, 1<sup>st</sup> April 2020

**Local Principal Investigator** Associate Professor Joseph Ischia

**Associate Investigator(s)** Dr Oneel Patel, Professor Rinaldo Bellomo, Dr Daryl Jones, Professor Damien Bolton, Dr Glenn Eastwood, Prof Paul Johnson, Prof Christine McDonald

**Location** Austin Hospital

### **Declaration by Participant**

I wish to withdraw from participation in the above research project and understand that such withdrawal will not affect my routine treatment, my relationship with those treating me or my relationship with Austin Health.

|                                    |            |
|------------------------------------|------------|
| Name of Participant (please print) |            |
| Signature _____                    | Date _____ |

Consent provided to use data collected up to the date of withdrawal: Yes No  
 Consent provided to access your medical record to obtain information of health status: Yes No

In the event, the participant decided to withdraw verbally, study doctor/senior researcher to give a description of the circumstances below:

|  |
|--|
|  |
|--|

### **Declaration by Study Doctor/Senior Researcher<sup>†</sup>**

I have given a verbal explanation of the implications of withdrawal from the research project and I believe that the participant has understood that explanation.

|                                                                    |            |
|--------------------------------------------------------------------|------------|
| Name of Study Doctor/Senior Researcher <sup>†</sup> (please print) |            |
| Signature _____                                                    | Date _____ |

<sup>†</sup> A senior member of the research team must provide the explanation of and information concerning withdrawal from the research project.



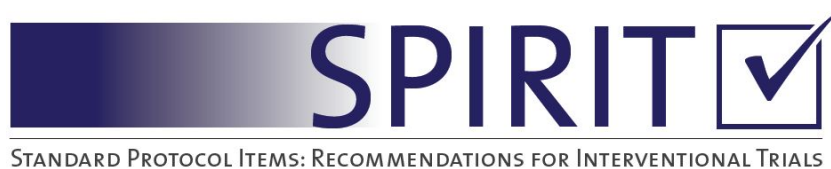

STANDARD PROTOCOL ITEMS: RECOMMENDATIONS FOR INTERVENTIONAL TRIALS

## SPIRIT 2013 Checklist: Recommended items to address in a clinical trial protocol and related documents\*

| Section/item                      | ItemNo | Description                                                                                                                                                                                                                                                                              | Location in protocol                        |
|-----------------------------------|--------|------------------------------------------------------------------------------------------------------------------------------------------------------------------------------------------------------------------------------------------------------------------------------------------|---------------------------------------------|
| <b>Administrative information</b> |        |                                                                                                                                                                                                                                                                                          |                                             |
| Title                             | 1      | Descriptive title identifying the study design, population, interventions, and, if applicable, trial acronym                                                                                                                                                                             | Page 1, Line 1-2                            |
| Trial registration                | 2a     | Trial identifier and registry name. If not yet registered, name of intended registry                                                                                                                                                                                                     | Page 2, Line 29<br>Page 5, Line 5           |
|                                   | 2b     | All items from the World Health Organization Trial Registration Data Set                                                                                                                                                                                                                 | Page 5, Line 5.<br>All other items as below |
| Protocol version                  | 3      | Date and version identifier                                                                                                                                                                                                                                                              | Page 5, Line 3                              |
| Funding                           | 4      | Sources and types of financial, material, and other support                                                                                                                                                                                                                              | Page 5, Line 7                              |
| Roles and responsibilities        | 5a     | Names, affiliations, and roles of protocol contributors                                                                                                                                                                                                                                  | Page 1, Lines 4-6                           |
|                                   | 5b     | Name and contact information for the trial sponsor                                                                                                                                                                                                                                       | Not applicable                              |
|                                   | 5c     | Role of study sponsor and funders, if any, in study design; collection, management, analysis, and interpretation of data; writing of the report; and the decision to submit the report for publication, including whether they will have ultimate authority over any of these activities | Not applicable                              |
|                                   | 5d     | Composition, roles, and responsibilities of the coordinating centre, steering committee, endpoint adjudication committee, data management team, and other individuals or groups overseeing the trial, if applicable (see Item 21a for data monitoring committee)                         | Page 10, Line 8-13                          |
| <b>Introduction</b>               |        |                                                                                                                                                                                                                                                                                          |                                             |
| Background and rationale          | 6a     | Description of research question and justification for undertaking the trial, including summary of relevant studies (published and unpublished) examining benefits and harms for each intervention                                                                                       | Page 4, Lines 30-32                         |



|    |                                                           |     |                                                        |                                   |
|----|-----------------------------------------------------------|-----|--------------------------------------------------------|-----------------------------------|
| 1  |                                                           |     |                                                        |                                   |
| 2  |                                                           | 6b  | Explanation for choice of comparators                  | Page 8, Line 6                    |
| 3  |                                                           |     |                                                        |                                   |
| 4  | Objectives                                                | 7   | Specific objectives or hypotheses                      | Page 8, lines 20-Page 9, Line 7   |
| 5  |                                                           |     |                                                        |                                   |
| 6  | Trial design                                              | 8   | Description of trial design including type of trial    | Page 5, Line 19-22                |
| 7  |                                                           |     | (eg, parallel group, crossover, factorial, single      |                                   |
| 8  |                                                           |     | group), allocation ratio, and framework (eg,           |                                   |
| 9  |                                                           |     | superiority, equivalence, noninferiority,              |                                   |
| 10 |                                                           |     | exploratory)                                           |                                   |
| 11 |                                                           |     |                                                        |                                   |
| 12 |                                                           |     |                                                        |                                   |
| 13 | <b>Methods: Participants, interventions, and outcomes</b> |     |                                                        |                                   |
| 14 |                                                           |     |                                                        |                                   |
| 15 | Study setting                                             | 9   | Description of study settings (eg, community clinic,   | Page 5, Line 19-22                |
| 16 |                                                           |     | academic hospital) and list of countries where         |                                   |
| 17 |                                                           |     | data will be collected. Reference to where list of     |                                   |
| 18 |                                                           |     | study sites can be obtained                            |                                   |
| 19 |                                                           |     |                                                        |                                   |
| 20 | Eligibility criteria                                      | 10  | Inclusion and exclusion criteria for participants. If  | Page 7, Lines 1-10                |
| 21 |                                                           |     | applicable, eligibility criteria for study centres and |                                   |
| 22 |                                                           |     | individuals who will perform the interventions (eg,    |                                   |
| 23 |                                                           |     | surgeons, psychotherapists)                            |                                   |
| 24 |                                                           |     |                                                        |                                   |
| 25 |                                                           |     |                                                        |                                   |
| 26 | Interventions                                             | 11a | Interventions for each group with sufficient detail    | Page 8, Line 3-16                 |
| 27 |                                                           |     | to allow replication, including how and when they      |                                   |
| 28 |                                                           |     | will be administered                                   |                                   |
| 29 |                                                           |     |                                                        |                                   |
| 30 |                                                           |     |                                                        |                                   |
| 31 |                                                           | 11b | Criteria for discontinuing or modifying allocated      | Page 9, Lines 27 - Page10, Line 5 |
| 32 |                                                           |     | interventions for a given trial participant (eg, drug  |                                   |
| 33 |                                                           |     | dose change in response to harms, participant          |                                   |
| 34 |                                                           |     | request, or improving/worsening disease)               |                                   |
| 35 |                                                           |     |                                                        |                                   |
| 36 |                                                           | 11c | Strategies to improve adherence to intervention        | Page 9, Lines -21                 |
| 37 |                                                           |     | protocols, and any procedures for monitoring           |                                   |
| 38 |                                                           |     | adherence (eg, drug tablet return, laboratory tests)   |                                   |
| 39 |                                                           |     |                                                        |                                   |
| 40 |                                                           |     |                                                        |                                   |
| 41 |                                                           | 11d | Relevant concomitant care and interventions that       | Page 7, Line 8-10                 |
| 42 |                                                           |     | are permitted or prohibited during the trial           |                                   |
| 43 |                                                           |     |                                                        |                                   |
| 44 | Outcomes                                                  | 12  | Primary, secondary, and other outcomes,                | Page 8, Line 20 to Page 9, Line 7 |
| 45 |                                                           |     | including the specific measurement variable (eg,       |                                   |
| 46 |                                                           |     | systolic blood pressure), analysis metric (eg,         |                                   |
| 47 |                                                           |     | change from baseline, final value, time to event),     |                                   |
| 48 |                                                           |     | method of aggregation (eg, median, proportion),        |                                   |
| 49 |                                                           |     | and time point for each outcome. Explanation of        |                                   |
| 50 |                                                           |     | the clinical relevance of chosen efficacy and harm     |                                   |
| 51 |                                                           |     | outcomes is strongly recommended                       |                                   |
| 52 |                                                           |     |                                                        |                                   |
| 53 |                                                           |     |                                                        |                                   |
| 54 | Participant timeline                                      | 13  | Time schedule of enrolment, interventions              | Page 8, Line 5-6                  |
| 55 |                                                           |     | (including any run-ins and washouts),                  |                                   |
| 56 |                                                           |     | assessments, and visits for participants. A            |                                   |
| 57 |                                                           |     | schematic diagram is highly recommended (see           |                                   |
| 58 |                                                           |     | Figure)                                                |                                   |
| 59 |                                                           |     |                                                        |                                   |
| 60 |                                                           |     |                                                        |                                   |

|    |             |    |                                                |                     |
|----|-------------|----|------------------------------------------------|---------------------|
| 1  |             |    |                                                |                     |
| 2  | Sample size | 14 | Estimated number of participants needed to     | Page 10, Line 17-33 |
| 3  |             |    | achieve study objectives and how it was        |                     |
| 4  |             |    | determined, including clinical and statistical |                     |
| 5  |             |    | assumptions supporting any sample size         |                     |
| 6  |             |    | calculations                                   |                     |
| 7  |             |    |                                                |                     |
| 8  |             |    |                                                |                     |
| 9  | Recruitment | 15 | Strategies for achieving adequate participant  | Page 10, Line 31-33 |
| 10 |             |    | enrolment to reach target sample size          | Page 7, Line 13-17  |
| 11 |             |    |                                                |                     |

## 12 **Methods: Assignment of interventions (for controlled trials)**

### 13 Allocation:

|    |                    |     |                                                        |                     |
|----|--------------------|-----|--------------------------------------------------------|---------------------|
| 14 |                    |     |                                                        |                     |
| 15 |                    |     |                                                        |                     |
| 16 | Sequence           | 16a | Method of generating the allocation sequence (eg,      | Page 7, Lines 23-34 |
| 17 | generation         |     | computer-generated random numbers), and list of        |                     |
| 18 |                    |     | any factors for stratification. To reduce              |                     |
| 19 |                    |     | predictability of a random sequence, details of any    |                     |
| 20 |                    |     | planned restriction (eg, blocking) should be           |                     |
| 21 |                    |     | provided in a separate document that is                |                     |
| 22 |                    |     | unavailable to those who enrol participants or         |                     |
| 23 |                    |     | assign interventions                                   |                     |
| 24 |                    |     |                                                        |                     |
| 25 |                    |     |                                                        |                     |
| 26 |                    |     |                                                        |                     |
| 27 | Allocation         | 16b | Mechanism of implementing the allocation               | Page 7, Lines 23-34 |
| 28 | concealment        |     | sequence (eg, central telephone; sequentially          |                     |
| 29 | mechanism          |     | numbered, opaque, sealed envelopes), describing        |                     |
| 30 |                    |     | any steps to conceal the sequence until                |                     |
| 31 |                    |     | interventions are assigned                             |                     |
| 32 |                    |     |                                                        |                     |
| 33 |                    |     |                                                        |                     |
| 34 | Implementation     | 16c | Who will generate the allocation sequence, who         | Page 8, Line 10-16  |
| 35 |                    |     | will enrol participants, and who will assign           |                     |
| 36 |                    |     | participants to interventions                          |                     |
| 37 |                    |     |                                                        |                     |
| 38 | Blinding (masking) | 17a | Who will be blinded after assignment to                | Page 7, Line 28     |
| 39 |                    |     | interventions (eg, trial participants, care providers, |                     |
| 40 |                    |     | outcome assessors, data analysts), and how             |                     |
| 41 |                    |     |                                                        |                     |
| 42 |                    |     |                                                        |                     |
| 43 |                    | 17b | If blinded, circumstances under which unblinding       | Page 7, Line 32-34  |
| 44 |                    |     | is permissible, and procedure for revealing a          |                     |
| 45 |                    |     | participant's allocated intervention during the trial  |                     |
| 46 |                    |     |                                                        |                     |

## 47 **Methods: Data collection, management, and analysis**

|    |                 |     |                                                       |                    |
|----|-----------------|-----|-------------------------------------------------------|--------------------|
| 48 |                 |     |                                                       |                    |
| 49 | Data collection | 18a | Plans for assessment and collection of outcome,       | Page 9, Line 10-13 |
| 50 | methods         |     | baseline, and other trial data, including any related |                    |
| 51 |                 |     | processes to promote data quality (eg, duplicate      |                    |
| 52 |                 |     | measurements, training of assessors) and a            |                    |
| 53 |                 |     | description of study instruments (eg,                 |                    |
| 54 |                 |     | questionnaires, laboratory tests) along with their    |                    |
| 55 |                 |     | reliability and validity, if known. Reference to      |                    |
| 56 |                 |     | where data collection forms can be found, if not in   |                    |
| 57 |                 |     | the protocol                                          |                    |
| 58 |                 |     |                                                       |                    |
| 59 |                 |     |                                                       |                    |
| 60 |                 |     |                                                       |                    |

|    |                                 |     |                                                      |                                    |
|----|---------------------------------|-----|------------------------------------------------------|------------------------------------|
| 1  |                                 |     |                                                      |                                    |
| 2  |                                 | 18b | Plans to promote participant retention and           | Page 9, Line 22-24                 |
| 3  |                                 |     | complete follow-up, including list of any outcome    |                                    |
| 4  |                                 |     | data to be collected for participants who            |                                    |
| 5  |                                 |     | discontinue or deviate from intervention protocols   |                                    |
| 6  |                                 |     |                                                      |                                    |
| 7  | Data management                 | 19  | Plans for data entry, coding, security, and storage, | Page 9, Line 10-13                 |
| 8  |                                 |     | including any related processes to promote data      |                                    |
| 9  |                                 |     | quality (eg, double data entry; range checks for     |                                    |
| 10 |                                 |     | data values). Reference to where details of data     |                                    |
| 11 |                                 |     | management procedures can be found, if not in        |                                    |
| 12 |                                 |     | the protocol                                         |                                    |
| 13 |                                 |     |                                                      |                                    |
| 14 |                                 |     |                                                      |                                    |
| 15 | Statistical methods             | 20a | Statistical methods for analysing primary and        | Page 11, Line 1-34                 |
| 16 |                                 |     | secondary outcomes. Reference to where other         |                                    |
| 17 |                                 |     | details of the statistical analysis plan can be      |                                    |
| 18 |                                 |     | found, if not in the protocol                        |                                    |
| 19 |                                 |     |                                                      |                                    |
| 20 |                                 |     |                                                      |                                    |
| 21 |                                 | 20b | Methods for any additional analyses (eg, subgroup    | Page 11, Line 31-34                |
| 22 |                                 |     | and adjusted analyses)                               |                                    |
| 23 |                                 |     |                                                      |                                    |
| 24 |                                 |     |                                                      |                                    |
| 25 |                                 | 20c | Definition of analysis population relating to        | Page 11, Line 19-22                |
| 26 |                                 |     | protocol non-adherence (eg, as randomised            |                                    |
| 27 |                                 |     | analysis), and any statistical methods to handle     |                                    |
| 28 |                                 |     | missing data (eg, multiple imputation)               |                                    |
| 29 |                                 |     |                                                      |                                    |
| 30 | <b>Methods: Monitoring</b>      |     |                                                      |                                    |
| 31 |                                 |     |                                                      |                                    |
| 32 | Data monitoring                 | 21a | Composition of data monitoring committee (DMC);      | Page 10, Line 8-13                 |
| 33 |                                 |     | summary of its role and reporting structure;         |                                    |
| 34 |                                 |     | statement of whether it is independent from the      |                                    |
| 35 |                                 |     | sponsor and competing interests; and reference to    |                                    |
| 36 |                                 |     | where further details about its charter can be       |                                    |
| 37 |                                 |     | found, if not in the protocol. Alternatively, an     |                                    |
| 38 |                                 |     | explanation of why a DMC is not needed               |                                    |
| 39 |                                 |     |                                                      |                                    |
| 40 |                                 |     |                                                      |                                    |
| 41 |                                 | 21b | Description of any interim analyses and stopping     | Page 11, Line 28-29                |
| 42 |                                 |     | guidelines, including who will have access to        |                                    |
| 43 |                                 |     | these interim results and make the final decision    |                                    |
| 44 |                                 |     | to terminate the trial                               |                                    |
| 45 |                                 |     |                                                      |                                    |
| 46 |                                 |     |                                                      |                                    |
| 47 | Harms                           | 22  | Plans for collecting, assessing, reporting, and      | Page 9, Line 27 to Page 10, Line 5 |
| 48 |                                 |     | managing solicited and spontaneously reported        |                                    |
| 49 |                                 |     | adverse events and other unintended effects of       |                                    |
| 50 |                                 |     | trial interventions or trial conduct                 |                                    |
| 51 |                                 |     |                                                      |                                    |
| 52 |                                 |     |                                                      |                                    |
| 53 | Auditing                        | 23  | Frequency and procedures for auditing trial          | Page 11, Line 28-29                |
| 54 |                                 |     | conduct, if any, and whether the process will be     |                                    |
| 55 |                                 |     | independent from investigators and the sponsor       |                                    |
| 56 |                                 |     |                                                      |                                    |
| 57 |                                 |     |                                                      |                                    |
| 58 | <b>Ethics and dissemination</b> |     |                                                      |                                    |
| 59 |                                 |     |                                                      |                                    |
| 60 |                                 |     |                                                      |                                    |

|    |                          |     |                                                        |                    |
|----|--------------------------|-----|--------------------------------------------------------|--------------------|
| 1  |                          |     |                                                        |                    |
| 2  | Research ethics          | 24  | Plans for seeking research ethics                      | Page 5, Line 2-4   |
| 3  | approval                 |     | committee/institutional review board (REC/IRB)         |                    |
| 4  |                          |     | approval                                               |                    |
| 5  |                          |     |                                                        |                    |
| 6  | Protocol amendments      | 25  | Plans for communicating important protocol             | Page 5, Line 3-4   |
| 7  |                          |     | modifications (eg, changes to eligibility criteria,    |                    |
| 8  |                          |     | outcomes, analyses) to relevant parties (eg,           |                    |
| 9  |                          |     | investigators, REC/IRBs, trial participants, trial     |                    |
| 10 |                          |     | registries, journals, regulators)                      |                    |
| 11 |                          |     |                                                        |                    |
| 12 |                          |     |                                                        |                    |
| 13 | Consent or assent        | 26a | Who will obtain informed consent or assent from        | Page 7, Line 18-20 |
| 14 |                          |     | potential trial participants or authorised             |                    |
| 15 |                          |     | surrogates, and how (see Item 32)                      |                    |
| 16 |                          |     |                                                        |                    |
| 17 |                          |     |                                                        |                    |
| 18 |                          | 26b | Additional consent provisions for collection and       | Not applicable     |
| 19 |                          |     | use of participant data and biological specimens in    |                    |
| 20 |                          |     | ancillary studies, if applicable                       |                    |
| 21 |                          |     |                                                        |                    |
| 22 | Confidentiality          | 27  | How personal information about potential and           | Page 11, Line 2-4  |
| 23 |                          |     | enrolled participants will be collected, shared, and   |                    |
| 24 |                          |     | maintained in order to protect confidentiality         |                    |
| 25 |                          |     | before, during, and after the trial                    |                    |
| 26 |                          |     |                                                        |                    |
| 27 |                          |     |                                                        |                    |
| 28 | Declaration of           | 28  | Financial and other competing interests for            | Page 14, Line 7    |
| 29 | interests                |     | principal investigators for the overall trial and each |                    |
| 30 |                          |     | study site                                             |                    |
| 31 |                          |     |                                                        |                    |
| 32 | Access to data           | 29  | Statement of who will have access to the final trial   | Page 11, Line 2-4  |
| 33 |                          |     | dataset, and disclosure of contractual agreements      |                    |
| 34 |                          |     | that limit such access for investigators               |                    |
| 35 |                          |     |                                                        |                    |
| 36 |                          |     |                                                        |                    |
| 37 | Ancillary and post-trial | 30  | Provisions, if any, for ancillary and post-trial care, | Page 10, Line 3-4  |
| 38 | care                     |     | and for compensation to those who suffer harm          |                    |
| 39 |                          |     | from trial participation                               |                    |
| 40 |                          |     |                                                        |                    |
| 41 | Dissemination policy     | 31a | Plans for investigators and sponsor to                 | Page 12, Line 3-5  |
| 42 |                          |     | communicate trial results to participants,             |                    |
| 43 |                          |     | healthcare professionals, the public, and other        |                    |
| 44 |                          |     | relevant groups (eg, via publication, reporting in     |                    |
| 45 |                          |     | results databases, or other data sharing               |                    |
| 46 |                          |     | arrangements), including any publication               |                    |
| 47 |                          |     | restrictions                                           |                    |
| 48 |                          |     |                                                        |                    |
| 49 |                          |     |                                                        |                    |
| 50 |                          |     |                                                        |                    |
| 51 |                          | 31b | Authorship eligibility guidelines and any intended     | Page 12, Line 3-5  |
| 52 |                          |     | use of professional writers                            |                    |
| 53 |                          |     |                                                        |                    |
| 54 |                          | 31c | Plans, if any, for granting public access to the full  | Page 12, Line 2    |
| 55 |                          |     | protocol, participant-level dataset, and statistical   |                    |
| 56 |                          |     | code                                                   |                    |
| 57 |                          |     |                                                        |                    |

## Appendices

|                            |    |                                                                                                                                                                                                |                |
|----------------------------|----|------------------------------------------------------------------------------------------------------------------------------------------------------------------------------------------------|----------------|
| Informed consent materials | 32 | Model consent form and other related documentation given to participants and authorised surrogates                                                                                             | Attached       |
| Biological specimens       | 33 | Plans for collection, laboratory evaluation, and storage of biological specimens for genetic or molecular analysis in the current trial and for future use in ancillary studies, if applicable | Not applicable |

---

\*It is strongly recommended that this checklist be read in conjunction with the SPIRIT 2013 Explanation & Elaboration for important clarification on the items. Amendments to the protocol should be tracked and dated. The SPIRIT checklist is copyrighted by the SPIRIT Group under the Creative Commons "[Attribution-NonCommercial-NoDerivs 3.0 Unported](#)" license.

For peer review only
